# Supplementary material for: On the effects of the basis set superposition error on the change of QTAIM charges in adduct formation. Application to complexes between morphine and cocaine and their main metabolites
Source: Royal Society of Chemistry journal article supplement (doi:10.1039/c6ra22736h), 2016-01-01

**On the effects of the basis set superposition error on the change of QTAIM charges in adduct formation. Application to complexes between morphine and cocaine and their main metabolites.**

David A. Rincón<sup>1</sup>, M. Natália D.S. Cordeiro<sup>2\*</sup>, Ricardo A. Mosquera<sup>1\*</sup>

<sup>1</sup>*Departamento de Química Física, Universidade de Vigo, Lagoas-Marcosende 36310 Vigo, Spain.*

<sup>2</sup>*REQUIMTE, Departamento de Química e Bioquímica, Universidade do Porto, Rua do Campo Alegre 687, 4169-007 Porto, Portugal.*

## SUPPORTING INFORMATION

**Supplementary Table 1** B3LYP/6-31++G\*\* 6d total energies,  $E$ , virial ratios,  $\gamma$ , and zero-point energy corrections,  $ZPE$ , for all the systems studied herein. Recovering errors from QTAIM atomic fragments for energies,  $E - \Sigma E(\Omega)$ , and electron populations,  $N - \Sigma N(\Omega)$ , are, respectively in  $\text{kJ mol}^{-1}$  and in au multiplied by  $10^3$ . All the remaining values are in a.u. except  $ZPE$  which are in  $\text{kJ mol}^{-1}$ . The letters on each acronym correspond to: **M**, morphine; **H**, heroin; **C**, cocaine; and **E**, ecgonine methyl ester.

| Complex    | Monomers | $E$          |              |              |              | $E - \Sigma E(\Omega)$ |         |         |         | $N - \Sigma N(\Omega)$ |         |         |         | $\gamma = -V / T$ |         |         | $ZPE$   |         |         |         |
|------------|----------|--------------|--------------|--------------|--------------|------------------------|---------|---------|---------|------------------------|---------|---------|---------|-------------------|---------|---------|---------|---------|---------|---------|
|            |          | $E^X_X(X)$   | $E^X_X(M)$   | $E^X_M(M)$   | $E^M_M(M)$   | $X^X_X$                | $M^X_X$ | $M^M_X$ | $M^M_M$ | $X^X_X$                | $M^X_X$ | $M^M_X$ | $M^M_M$ | $X^X_X$           | $M^X_X$ | $M^M_X$ | $X^X_X$ | $M^M_M$ |         |         |
| <b>HE1</b> | <b>E</b> | -1917.482893 | -672.161951  | -672.161463  | -672.161793  | -0.15                  | -0.41   | -0.56   | -0.28   | 0.1                    | -0.3    | -0.6    | -0.1    | 2.00931           | 2.00939 | 2.00940 | 2.00936 | 1868.37 | 747.66  |         |
|            | <b>H</b> |              | -1245.348544 | -1245.348144 | -1245.349645 | 0.09                   | 1.45    | 1.13    | 0.3     | 0.3                    | -1.0    | 2.5     | 2.00929 | 2.00931           | 2.00931 | 2.00929 |         |         | 1116.21 | 1116.21 |
| <b>HE2</b> | <b>E</b> | -1917.480451 | -672.161872  | -672.161414  | -672.161793  | 0.27                   | -0.28   | -0.60   | -0.28   | 1.5                    | -0.1    | -0.6    | -0.1    | 2.00931           | 2.00939 | 2.00940 | 2.00936 | 1867.26 | 747.65  |         |
|            | <b>H</b> |              | -1245.345237 | -1245.344774 | -1245.349645 | 0.45                   | -0.10   | 0.81    | 1.7     | 0.8                    | 1.7     | 0.8     | 1.7     | 2.00931           | 2.00932 | 2.00932 | 2.00929 |         |         | 1116.22 |
| <b>MC1</b> | <b>C</b> | -1956.567271 | -1016.583026 | -1016.582277 | -1016.583159 | 0.05                   | 0.05    | -1.03   | 0.24    | 0.4                    | -1.1    | -1.0    | 0.8     | 2.00935           | 2.00941 | 2.00943 | 2.00940 | 1911.83 | 987.62  |         |
|            | <b>M</b> |              | -940.015661  | -940.014773  | -940.014943  | -0.58                  | -0.16   | -0.44   | 0.2     | 0.2                    | -0.4    | -0.6    | 2.00935 | 2.00935           | 2.00937 | 2.00933 |         |         | 920.79  | 920.79  |
| <b>MC2</b> | <b>C</b> | -1956.561552 | -1016.581306 | -1016.580618 | -1016.583159 | -0.20                  | -0.25   | 0.44    | 0.27    | 0.3                    | 0.0     | 1.3     | 0.8     | 2.00935           | 2.00940 | 2.00942 | 2.00940 | 1910.40 | 987.61  |         |
|            | <b>M</b> |              | -940.012101  | -940.011050  | -940.011992  | -0.04                  | 0.93    | -0.19   | 0.4     | 1.7                    | -0.2    | 0.8     | 2.00938 | 2.00938           | 2.00939 | 2.00933 |         |         | 919.46  | 919.46  |
| <b>MC3</b> | <b>C</b> | -1956.560776 | -1016.583420 | -1016.582932 | -1016.583159 | 3.34                   | -1.57   | 0.11    | 0.38    | -0.7                   | -2.3    | 0.4     | 1.0     | 2.00935           | 2.00941 | 2.00943 | 2.00940 | 1908.86 | 987.61  |         |
|            | <b>M</b> |              | -940.017558  | -940.016789  | -940.016991  | -0.21                  | -0.12   | -0.27   | 0.0     | 0.0                    | -0.2    | -0.7    | 2.00934 | 2.00935           | 2.00935 | 2.00933 |         |         | 920.79  | 920.79  |
| <b>MC4</b> | <b>C</b> | -1956.560209 | -1016.582686 | -1016.582213 | -1016.583159 | 0.01                   | -0.05   | -0.19   | 0.29    | 0.8                    | 0.5     | 0.0     | 0.9     | 2.00935           | 2.00940 | 2.00942 | 2.00940 | 1909.42 | 987.62  |         |
|            | <b>M</b> |              | -940.017266  | -940.016541  | -940.016991  | 0.09                   | 0.11    | -0.50   | 0.7     | 0.7                    | -0.0    | -0.8    | 2.00936 | 2.00936           | 2.00938 | 2.00933 |         |         | 920.79  | 920.79  |
| <b>ME1</b> | <b>E</b> | -1612.140055 | -672.162726  | -672.162257  | -672.162493  | -0.58                  | 0.16    | -0.32   | -0.34   | -0.3                   | 0.4     | -0.2    | -0.4    | 2.00934           | 2.00938 | 2.00939 | 2.00936 | 1671.51 | 748.04  |         |
|            | <b>M</b> |              | -940.012077  | -940.011528  | -940.012402  | -0.29                  | 0.95    | -0.02   | 0.5     | -0.1                   | 1.9     | 0.5     | 2.00937 | 2.00937           | 2.00937 | 2.00933 |         |         | 920.38  | 920.38  |
| <b>ME2</b> | <b>E</b> | -1612.143016 | -672.161694  | -672.161267  | -672.161793  | 0.24                   | 0.05    | -0.59   | -0.25   | 0.7                    | 0.4     | -0.7    | -0.1    | 2.00934           | 2.00939 | 2.00940 | 2.00936 | 1671.69 | 747.67  |         |
|            | <b>M</b> |              | -940.017055  | -940.016492  | -940.016991  | 0.06                   | -0.56   | -0.37   | 0.4     | 0.4                    | -0.5    | -0.8    | 2.00937 | 2.00937           | 2.00937 | 2.00933 |         |         | 920.78  | 920.78  |
| <b>ME3</b> | <b>E</b> | -1612.139209 | -672.162126  | -672.161502  | -672.162493  | -0.31                  | -0.98   | -0.27   | -0.35   | 0.1                    | -1.0    | -0.1    | -0.4    | 2.00933           | 2.00936 | 2.00939 | 2.00936 | 1671.21 | 748.03  |         |
|            | <b>M</b> |              | -940.011963  | -940.011206  | -940.012402  | -0.60                  | 0.20    | -0.02   | 0.5     | -0.2                   | 0.5     | 0.5     | 2.00937 | 2.00937           | 2.00938 | 2.00933 |         |         | 920.38  | 920.38  |
| <b>ME4</b> | <b>E</b> | -1612.139783 | -672.162671  | -672.162063  | -672.162493  | -0.48                  | 0.22    | -0.93   | -0.34   | -0.7                   | 0.5     | -1.2    | -0.4    | 2.00934           | 2.00938 | 2.00939 | 2.00936 | 1671.71 | 748.02  |         |
|            | <b>M</b> |              | -940.015068  | -940.014529  | -940.014943  | -0.48                  | 0.29    | -0.44   | 0.7     | -0.3                   | 0.7     | -0.6    | 2.00936 | 2.00936           | 2.00937 | 2.00933 |         |         | 920.79  | 920.79  |
| <b>ME5</b> | <b>E</b> | -1612.138217 | -672.162147  | -672.161600  | -672.162493  | 0.04                   | -0.88   | -0.66   | -0.33   | 1.1                    | -1.0    | -0.7    | -0.4    | 2.00933           | 2.00936 | 2.00939 | 2.00936 | 1671.61 | 748.04  |         |
|            | <b>M</b> |              | -940.015240  | -940.014611  | -940.014943  | 1.17                   | -0.51   | -0.38   | 0.5     | 2.5                    | -0.4    | -0.5    | 2.00936 | 2.00937           | 2.00933 |         |         | 920.79  | 920.79  |         |

**Supplementary Table 2** The atomic property variations,  $P(\Omega)$ , shown are defined as follows:  $\Delta_{\text{def}}P(\Omega)=(P_X^M(\Omega_M)-P_M^M(\Omega_M))$ ,  $-\Delta_{\text{BSSSE}}P(\Omega)=(P_X^X(\Omega_M)-P_X^M(\Omega_M))$ , and  $\Delta_b^{\text{CP}}P(\Omega)=(P_X^X(\Omega_X)-P_X^M(\Omega_M))$ . These properties are the atomic electron population,  $N(\Omega)$ , the atomic energy,  $E(\Omega)$ , and the atomic volume,  $v(\Omega)$ . All the values are in au but energy variations are in  $\text{kJ mol}^{-1}$ . To nomenclature purposes see Figure 1 in manuscript. Moreover, the acronyms T, C, G, G<sup>+</sup>, A<sup>-</sup>, and A<sup>+</sup> respectively correspond to antiperiplanar orientation, synperiplanar, - synclinal, + synclinal, - anticlinal, and + anticlinal.

**Supplementary Table 2.1a** Integrated properties of ecgonine methyl ester in HE1.

| Atom     | $N(\Omega)$ | $E(\Omega)$ | $v(\Omega)$ | $\Delta_{\text{def}}E(\Omega)$ | $-\Delta_{\text{BSSSE}}E(\Omega)$ | $\Delta_b^{\text{CP}}E(\Omega)$ | $\Delta_{\text{def}}N(\Omega)10^3$ | $-\Delta_{\text{BSSSE}}N(\Omega) \cdot 10^3$ | $\Delta_b^{\text{CP}}N(\Omega) \cdot 10^3$ | $\Delta_{\text{def}}V(\Omega) \cdot 10^3$ | $-\Delta_{\text{BSSSE}}v(\Omega) \cdot 10^3$ | $\Delta_b^{\text{CP}}v(\Omega) \cdot 10^3$ |
|----------|-------------|-------------|-------------|--------------------------------|-----------------------------------|---------------------------------|------------------------------------|----------------------------------------------|--------------------------------------------|-------------------------------------------|----------------------------------------------|--------------------------------------------|
| C1       | 5.7246      | -37.91387   | 46.95       | -4.4                           | 0.2                               | 7.1                             | 0                                  | 0                                            | 0                                          | -110                                      | 23                                           | 8                                          |
| H1       | 0.9635      | -0.62342    | 45.73       | -0.5                           | 0.0                               | 0.9                             | 0                                  | 0                                            | -1                                         | -31                                       | -21                                          | -72                                        |
| C2       | 5.9373      | -38.07088   | 48.07       | -2.7                           | 0.1                               | 5.5                             | 0                                  | 0                                            | 0                                          | -42                                       | -35                                          | -49                                        |
| H2       | 0.9537      | -0.61744    | 44.53       | -3.0                           | 0.0                               | -3.8                            | 2                                  | 0                                            | 3                                          | 16                                        | -5                                           | 179                                        |
| C1'      | 4.3834      | -37.02715   | 33.75       | -10.4                          | -0.2                              | 5.6                             | 3                                  | 0                                            | 1                                          | 141                                       | -32                                          | -43                                        |
| O1'      | 9.2095      | -75.99866   | 123.29      | -9.6                           | 1.5                               | 16.1                            | 1                                  | 0                                            | 0                                          | 219                                       | -40                                          | 2                                          |
| O2'      | 9.0940      | -75.97442   | 100.21      | 11.1                           | 0.9                               | 9.6                             | -2                                 | 0                                            | 3                                          | 483                                       | -64                                          | 189                                        |
| C3'      | 5.5379      | -37.75967   | 62.58       | -2.0                           | -0.5                              | 9.6                             | -1                                 | 0                                            | -1                                         | -87                                       | -137                                         | -33                                        |
| Ht(C3')  | 0.9458      | -0.61142    | 45.56       | -0.5                           | 0.0                               | -2.7                            | 1                                  | 0                                            | 3                                          | 45                                        | -56                                          | 148                                        |
| Hg+(C3') | 0.9485      | -0.61085    | 45.59       | -2.4                           | 0.1                               | 6.1                             | 2                                  | 0                                            | -5                                         | 153                                       | 29                                           | -388                                       |
| Hg-(C3') | 0.9487      | -0.61070    | 45.77       | 0.7                            | 0.0                               | -7.2                            | -1                                 | 0                                            | 7                                          | -91                                       | 5                                            | 481                                        |
| C3       | 5.4188      | -37.68551   | 41.34       | 23.5                           | -2.1                              | 18.0                            | -9                                 | 0                                            | -6                                         | 24                                        | 39                                           | -126                                       |
| H3       | 1.0075      | -0.64898    | 45.72       | -1.0                           | 0.1                               | -2.9                            | 1                                  | 0                                            | 3                                          | 313                                       | 11                                           | 285                                        |
| O3       | 9.1651      | -75.84731   | 121.25      | 18.3                           | -1.4                              | -74.0                           | 4                                  | 0                                            | 45                                         | 402                                       | -119                                         | 208                                        |
| H(O3)    | 0.3672      | -0.33302    | 14.05       | 8.2                            | -0.4                              | 46.3                            | 0                                  | 1                                            | -30                                        | 198                                       | 100                                          | -6294                                      |
| C4       | 5.9403      | -38.05421   | 55.44       | 0.2                            | -0.6                              | 9.1                             | -1                                 | 0                                            | -1                                         | 27                                        | -8                                           | -51                                        |
| H4a      | 0.9733      | -0.62014    | 45.20       | 1.3                            | 0.0                               | -3.5                            | -1                                 | 0                                            | 3                                          | 167                                       | -16                                          | 274                                        |
| H4e      | 0.9886      | -0.62439    | 48.65       | -0.2                           | 0.1                               | -1.8                            | -1                                 | 0                                            | 2                                          | -199                                      | 45                                           | 184                                        |
| C5       | 5.7212      | -37.90904   | 48.01       | -4.5                           | 0.0                               | 7.0                             | 0                                  | 0                                            | 0                                          | 32                                        | -96                                          | 10                                         |
| H5       | 0.9663      | -0.62392    | 46.00       | 0.0                            | 0.0                               | -0.9                            | 0                                  | 0                                            | 1                                          | 17                                        | 10                                           | 76                                         |
| C6       | 5.9357      | -38.01419   | 58.09       | -5.0                           | 0.1                               | 8.6                             | 0                                  | 0                                            | 0                                          | 44                                        | 27                                           | -12                                        |
| H6a      | 0.9855      | -0.62525    | 47.27       | -0.6                           | 0.1                               | -3.8                            | 0                                  | 0                                            | 4                                          | 35                                        | 6                                            | 278                                        |
| H6e      | 0.9900      | -0.62917    | 47.53       | 0.2                            | 0.0                               | 1.0                             | 0                                  | 0                                            | -1                                         | 3                                         | 19                                           | -46                                        |
| C7       | 5.9352      | -38.01323   | 58.07       | -5.2                           | 0.0                               | 8.8                             | 0                                  | 0                                            | 0                                          | -22                                       | 29                                           | -4                                         |
| H7e      | 0.9851      | -0.62725    | 47.34       | -0.5                           | -0.1                              | 2.2                             | 0                                  | 0                                            | -2                                         | -101                                      | 59                                           | -131                                       |
| H7a      | 0.9829      | -0.62436    | 46.65       | -0.4                           | 0.0                               | -2.3                            | 0                                  | 0                                            | 2                                          | 120                                       | -23                                          | 167                                        |
| N8       | 8.0348      | -55.35619   | 59.66       | -1.1                           | 1.0                               | 12.7                            | -2                                 | 0                                            | 0                                          | 13                                        | 10                                           | -17                                        |
| H8       | 0.4828      | -0.39983    | 16.93       | -3.6                           | 0.1                               | -1.5                            | 3                                  | 0                                            | 1                                          | 397                                       | 10                                           | 26                                         |
| C8       | 5.6624      | -37.85359   | 64.00       | -5.5                           | -0.6                              | 7.1                             | 2                                  | 0                                            | 0                                          | 61                                        | -75                                          | 23                                         |
| Ha-(C8)  | 0.9443      | -0.60651    | 45.83       | 0.5                            | 0.0                               | 1.0                             | 0                                  | 0                                            | -1                                         | -41                                       | 16                                           | -31                                        |
| Ha+(C8)  | 0.9434      | -0.60601    | 45.84       | -0.1                           | 0.0                               | 2.1                             | 0                                  | 0                                            | -2                                         | -16                                       | 12                                           | -108                                       |
| Hc(C8)   | 0.9558      | -0.61444    | 44.34       | 0.5                            | 0.0                               | 1.1                             | -1                                 | 0                                            | -1                                         | -48                                       | -11                                          | -48                                        |

**Supplementary Table 2.1b** Integrated properties of heroin in HE1.

| Atom      | $N(\Omega)$ | $E(\Omega)$ | $\nu(\Omega)$ | $\Delta_{\text{def}}E(\Omega)$ | $-\Delta_{\text{BSSE}}E(\Omega)$ | $\Delta_{\text{b}}^{\text{CP}}E(\Omega)$ | $\Delta_{\text{def}}N(\Omega) \cdot 10^3$ | $-\Delta_{\text{BSSE}}N(\Omega) \cdot 10^3$ | $\Delta_{\text{b}}^{\text{CP}}N(\Omega) \cdot 10^3$ | $\Delta_{\text{def}}I(\Omega) \cdot 10^3$ | $-\Delta_{\text{BSSE}}I(\Omega) \cdot 10^3$ | $\Delta_{\text{b}}^{\text{CP}}I(\Omega) \cdot 10^3$ |
|-----------|-------------|-------------|---------------|--------------------------------|----------------------------------|------------------------------------------|-------------------------------------------|---------------------------------------------|-----------------------------------------------------|-------------------------------------------|---------------------------------------------|-----------------------------------------------------|
| C1        | 5.9924      | -38.03219   | 84.16         | -5.9                           | 0.1                              | 2.4                                      | 0                                         | 0                                           | -4                                                  | -17                                       | -28                                         | -231                                                |
| H1        | 0.9721      | -0.61544    | 48.56         | -0.1                           | 0.0                              | 8.2                                      | 0                                         | 0                                           | -8                                                  | -5                                        | 9                                           | -559                                                |
| C2        | 5.9643      | -38.03338   | 80.24         | -4.3                           | 0.3                              | 1.7                                      | 0                                         | 0                                           | -3                                                  | -4                                        | -63                                         | -134                                                |
| H2        | 0.9380      | -0.60767    | 43.55         | 0.1                            | 0.0                              | 7.3                                      | 0                                         | 0                                           | -7                                                  | -71                                       | 31                                          | -467                                                |
| C3        | 5.5077      | -37.77227   | 61.89         | 0.2                            | 0.1                              | 2.8                                      | 0                                         | 0                                           | -2                                                  | 264                                       | -42                                         | -67                                                 |
| O3        | 9.1183      | -76.00082   | 99.45         | -13.7                          | 0.7                              | 2.2                                      | 1                                         | 0                                           | -2                                                  | -180                                      | 47                                          | -76                                                 |
| C1'       | 4.4426      | -37.04457   | 38.40         | -1.7                           | 0.1                              | -1.6                                     | 0                                         | 0                                           | 1                                                   | 25                                        | 13                                          | 14                                                  |
| O1'       | 9.2210      | -76.00425   | 126.68        | -0.8                           | 0.9                              | -3.8                                     | -1                                        | 0                                           | 4                                                   | -551                                      | -27                                         | 168                                                 |
| C2'       | 5.9234      | -38.01355   | 70.15         | -2.2                           | 0.3                              | -0.1                                     | 0                                         | 0                                           | 0                                                   | 81                                        | 8                                           | 8                                                   |
| Ha-(C2')  | 0.9517      | -0.60264    | 46.64         | 4.5                            | 0.0                              | 7.5                                      | -1                                        | 0                                           | -7                                                  | 186                                       | -13                                         | -440                                                |
| Ha+(C2')  | 0.9503      | -0.60161    | 46.68         | -5.0                           | 0.0                              | -0.3                                     | 1                                         | 0                                           | 0                                                   | -285                                      | -54                                         | -5                                                  |
| Hc(C2')   | 0.9500      | -0.60797    | 44.75         | 1.1                            | 0.0                              | -2.9                                     | -1                                        | 0                                           | 3                                                   | 56                                        | 6                                           | 109                                                 |
| C4        | 5.4916      | -37.84845   | 58.03         | -6.9                           | -0.1                             | -7.1                                     | 7                                         | 0                                           | 6                                                   | 150                                       | 16                                          | 147                                                 |
| O         | 8.9971      | -75.78898   | 103.84        | 1.9                            | 0.2                              | -6.1                                     | -3                                        | 0                                           | 5                                                   | -935                                      | -22                                         | 360                                                 |
| C5        | 5.5587      | -37.88132   | 41.44         | 13.7                           | 2.1                              | 0.6                                      | -12                                       | -1                                          | 0                                                   | -372                                      | -105                                        | 16                                                  |
| H5        | 0.9754      | -0.64581    | 41.37         | -1.3                           | 0.0                              | 4.4                                      | -1                                        | 0                                           | -4                                                  | -273                                      | 50                                          | -194                                                |
| C6        | 5.4845      | -37.74557   | 44.38         | -17.2                          | -0.7                             | -17.0                                    | 21                                        | -1                                          | 10                                                  | 1652                                      | -86                                         | 90                                                  |
| H6        | 0.9379      | -0.61313    | 42.63         | 15.1                           | 0.1                              | -14.7                                    | -8                                        | 0                                           | 10                                                  | 443                                       | -3                                          | 342                                                 |
| O6        | 9.0779      | -75.93062   | 100.53        | -110.0                         | -1.5                             | 25.3                                     | 18                                        | 0                                           | -10                                                 | -799                                      | -26                                         | -770                                                |
| C1''      | 4.4546      | -37.06264   | 38.81         | 28.7                           | -1.9                             | 11.7                                     | -12                                       | 0                                           | -2                                                  | -21                                       | -7                                          | -225                                                |
| O1''      | 9.2008      | -76.01367   | 133.66        | 126.2                          | 4.9                              | -80.7                                    | -10                                       | 0                                           | 34                                                  | 1475                                      | -145                                        | -6645                                               |
| C2''      | 5.9207      | -38.00503   | 70.64         | -4.0                           | -5.8                             | -13.0                                    | 0                                         | 0                                           | 7                                                   | 16                                        | -25                                         | 259                                                 |
| Hc(C2'')  | 0.9550      | -0.60709    | 46.54         | 2.8                            | -0.4                             | -11.5                                    | -1                                        | 1                                           | -8                                                  | 21                                        | 100                                         | -2960                                               |
| Ha-(C2'') | 0.9657      | -0.60952    | 47.29         | 1.4                            | -0.1                             | 1.5                                      | 0                                         | 0                                           | -10                                                 | 124                                       | -23                                         | -676                                                |
| Ha+(C2'') | 0.9560      | -0.60297    | 47.27         | -9.6                           | -0.1                             | 14.7                                     | 5                                         | 0                                           | -13                                                 | 0                                         | 55                                          | -942                                                |
| C7        | 6.0076      | -38.06548   | 79.77         | 3.1                            | -0.4                             | -0.9                                     | -2                                        | 0                                           | 5                                                   | 107                                       | 49                                          | 440                                                 |
| H7        | 0.9281      | -0.59796    | 45.11         | -1.9                           | 0.0                              | -2.5                                     | 1                                         | 0                                           | 2                                                   | 3                                         | 0                                           | 112                                                 |
| C8        | 6.0257      | -38.04535   | 83.66         | -6.8                           | -0.1                             | 6.9                                      | 0                                         | 0                                           | -8                                                  | -113                                      | -38                                         | -605                                                |
| H8        | 0.9585      | -0.60873    | 47.88         | -0.9                           | 0.0                              | 9.1                                      | 0                                         | 0                                           | -9                                                  | 7                                         | 17                                          | -610                                                |
| C9        | 5.7588      | -37.89155   | 48.46         | -1.3                           | 0.4                              | 1.5                                      | -1                                        | 0                                           | 0                                                   | -68                                       | -14                                         | 34                                                  |
| H9        | 0.9683      | -0.62637    | 46.15         | 0.3                            | 0.0                              | 5.1                                      | 0                                         | 0                                           | -5                                                  | -4                                        | -6                                          | -352                                                |
| C10       | 5.9300      | -37.99894   | 58.42         | -4.5                           | -0.3                             | -0.5                                     | 0                                         | -1                                          | 0                                                   | -65                                       | -159                                        | 47                                                  |
| H10e      | 0.9934      | -0.62968    | 46.38         | -0.1                           | 0.0                              | 7.2                                      | 0                                         | 0                                           | -7                                                  | -25                                       | 40                                          | -346                                                |
| H10a      | 0.9585      | -0.61233    | 46.67         | 0.4                            | 0.0                              | 3.2                                      | 0                                         | 0                                           | -3                                                  | -69                                       | 20                                          | -222                                                |
| C11       | 6.0159      | -38.10707   | 68.98         | -3.9                           | 0.0                              | 2.7                                      | 1                                         | 0                                           | -2                                                  | -31                                       | -6                                          | -62                                                 |
| C12       | 6.0435      | -38.26481   | 59.84         | 0.7                            | -0.2                             | 0.7                                      | 0                                         | 0                                           | 0                                                   | -70                                       | -25                                         | 30                                                  |
| C13       | 5.9564      | -38.12502   | 40.98         | 7.1                            | 0.5                              | 1.7                                      | 2                                         | 0                                           | 0                                                   | 299                                       | 8                                           | 15                                                  |
| C14       | 5.9471      | -38.05244   | 49.20         | -2.2                           | 0.2                              | -0.8                                     | 0                                         | 0                                           | 0                                                   | -3                                        | -41                                         | 3                                                   |
| H14       | 1.0244      | -0.66325    | 42.16         | 1.4                            | 0.0                              | 0.1                                      | -1                                        | 0                                           | 0                                                   | -29                                       | -42                                         | 44                                                  |
| C15       | 5.9247      | -38.02332   | 55.81         | 2.0                            | 0.6                              | -0.6                                     | -1                                        | 1                                           | 1                                                   | 81                                        | 53                                          | -30                                                 |
| H15e      | 0.9557      | -0.61244    | 44.92         | -1.2                           | 0.0                              | -2.0                                     | 1                                         | 0                                           | 2                                                   | 172                                       | -82                                         | 97                                                  |
| H15a      | 0.9975      | -0.63012    | 48.16         | 0.9                            | 0.0                              | -8.5                                     | 0                                         | 0                                           | 8                                                   | 177                                       | 52                                          | 416                                                 |
| C16       | 5.7297      | -37.90167   | 53.81         | 0.1                            | 0.3                              | 2.2                                      | 0                                         | 0                                           | -1                                                  | 27                                        | 56                                          | -1                                                  |
| H16e      | 0.9587      | -0.61828    | 45.79         | 0.0                            | 0.0                              | 2.5                                      | 0                                         | 0                                           | -2                                                  | 45                                        | -26                                         | -106                                                |
| H16a      | 0.9531      | -0.61972    | 42.44         | -1.4                           | 0.0                              | 4.5                                      | 1                                         | 0                                           | -4                                                  | 16                                        | -41                                         | -172                                                |
| N17       | 7.9558      | -55.22503   | 58.84         | 2.2                            | 0.3                              | -0.3                                     | -1                                        | 0                                           | 1                                                   | 53                                        | -24                                         | -35                                                 |
| H17       | 0.5658      | -0.45138    | 27.23         | 1.0                            | 0.0                              | -1.3                                     | -1                                        | 0                                           | 1                                                   | 25                                        | 1                                           | 9                                                   |
| C17       | 5.6728      | -37.86294   | 62.93         | -5.3                           | 0.2                              | -1.7                                     | 3                                         | 0                                           | 1                                                   | 4                                         | -12                                         | 104                                                 |
| Ha+(C17)  | 0.9424      | -0.60576    | 45.54         | 0.3                            | 0.0                              | 5.1                                      | 0                                         | 0                                           | -5                                                  | -81                                       | -30                                         | -254                                                |
| Ha-(C17)  | 0.9406      | -0.60540    | 45.35         | 0.1                            | 0.0                              | 3.6                                      | 0                                         | 0                                           | -3                                                  | -28                                       | 30                                          | -172                                                |
| Hc(C17)   | 0.9447      | -0.60935    | 43.87         | 0.8                            | 0.0                              | 2.9                                      | -1                                        | 0                                           | -3                                                  | 74                                        | -41                                         | -162                                                |

**Supplementary Table 2.2a** Integrated properties of ecgonine methyl ester in HE2.

| Atom     | $N(\Omega)$ | $E(\Omega)$ | $\nu(\Omega)$ | $\Delta_{\text{def}}E(\Omega)$ | $-\Delta_{\text{BSSE}}E(\Omega)$ | $\Delta_{\text{b}}^{\text{CP}}E(\Omega)$ | $\Delta_{\text{def}}N(\Omega) \cdot 10^3$ | $-\Delta_{\text{BSSE}}N(\Omega) \cdot 10^3$ | $\Delta_{\text{b}}^{\text{CP}}N(\Omega) \cdot 10^3$ | $\Delta_{\text{def}}V(\Omega) \cdot 10^3$ | $-\Delta_{\text{BSSE}}V(\Omega) \cdot 10^3$ | $\Delta_{\text{b}}^{\text{CP}}V(\Omega) \cdot 10^3$ |
|----------|-------------|-------------|---------------|--------------------------------|----------------------------------|------------------------------------------|-------------------------------------------|---------------------------------------------|-----------------------------------------------------|-------------------------------------------|---------------------------------------------|-----------------------------------------------------|
| C1       | 5.7246      | -37.91387   | 46.95         | -3.5                           | 0.6                              | 6.8                                      | 0                                         | 0                                           | 0                                                   | -78                                       | 67                                          | 4                                                   |
| H1       | 0.9635      | -0.62342    | 45.73         | -0.5                           | 0.0                              | 0.5                                      | 0                                         | 0                                           | 0                                                   | 17                                        | -1                                          | -40                                                 |
| C2       | 5.9373      | -38.07088   | 48.07         | -2.2                           | 0.0                              | 5.0                                      | 1                                         | 0                                           | 0                                                   | 49                                        | -7                                          | -31                                                 |
| H2       | 0.9537      | -0.61744    | 44.53         | -2.5                           | 0.0                              | -4.7                                     | 2                                         | 0                                           | 4                                                   | 80                                        | -16                                         | 264                                                 |
| C1'      | 4.3834      | -37.02715   | 33.75         | -13.0                          | -0.3                             | 6.9                                      | 5                                         | 0                                           | 1                                                   | 184                                       | -4                                          | -42                                                 |
| O1'      | 9.2095      | -75.99866   | 123.29        | -13.3                          | 1.2                              | 16.4                                     | 0                                         | 0                                           | 0                                                   | -239                                      | 48                                          | -21                                                 |
| O2'      | 9.0940      | -75.97442   | 100.21        | 11.5                           | 0.1                              | 9.2                                      | -2                                        | 0                                           | 4                                                   | 463                                       | -79                                         | 232                                                 |
| C3'      | 5.5379      | -37.75967   | 62.58         | -3.0                           | -0.3                             | 8.9                                      | 0                                         | 0                                           | -1                                                  | -35                                       | -73                                         | 3                                                   |
| Ht(C3')  | 0.9458      | -0.61142    | 45.56         | -0.3                           | 0.0                              | -3.7                                     | 1                                         | 0                                           | 3                                                   | 1                                         | 37                                          | 167                                                 |
| Hg+(C3') | 0.9485      | -0.61085    | 45.59         | -1.7                           | 0.1                              | 5.4                                      | 1                                         | 0                                           | -5                                                  | 33                                        | 4                                           | -289                                                |
| Hg-(C3') | 0.9487      | -0.61070    | 45.77         | 0.6                            | 0.0                              | -4.8                                     | -1                                        | 0                                           | 4                                                   | -107                                      | -18                                         | 327                                                 |
| C3       | 5.4188      | -37.68551   | 41.34         | 26.9                           | -0.8                             | 20.5                                     | -13                                       | 0                                           | -8                                                  | -134                                      | 49                                          | -166                                                |
| H3       | 1.0075      | -0.64898    | 45.72         | -1.5                           | 0.1                              | -3.4                                     | 2                                         | 0                                           | 4                                                   | 159                                       | 17                                          | 312                                                 |
| O3       | 9.1651      | -75.84731   | 121.25        | 16.7                           | -1.8                             | -81.0                                    | 7                                         | 0                                           | 48                                                  | 630                                       | -248                                        | 1119                                                |
| H(O3)    | 0.3672      | -0.33302    | 14.05         | 10.3                           | -0.6                             | 47.8                                     | 0                                         | 1                                           | -33                                                 | 181                                       | 126                                         | -7197                                               |
| C4       | 5.9403      | -38.05421   | 55.44         | -1.6                           | -0.3                             | 8.4                                      | -2                                        | 0                                           | -1                                                  | -119                                      | 65                                          | -74                                                 |
| H4a      | 0.9733      | -0.62014    | 45.20         | 0.4                            | 0.0                              | -2.7                                     | -1                                        | 0                                           | 3                                                   | -109                                      | 13                                          | 233                                                 |
| H4e      | 0.9886      | -0.62439    | 48.65         | 1.0                            | 0.1                              | -4.0                                     | -1                                        | 0                                           | 4                                                   | -155                                      | 27                                          | 345                                                 |
| C5       | 5.7212      | -37.90904   | 48.01         | -3.1                           | -0.2                             | 6.7                                      | 0                                         | 0                                           | 0                                                   | 5                                         | -9                                          | -7                                                  |
| H5       | 0.9663      | -0.62392    | 46.00         | 0.3                            | 0.0                              | -1.6                                     | 0                                         | 0                                           | 2                                                   | 56                                        | -17                                         | 76                                                  |
| C6       | 5.9357      | -38.01419   | 58.09         | -3.8                           | -0.1                             | 8.5                                      | 0                                         | 0                                           | 0                                                   | 121                                       | -94                                         | -13                                                 |
| H6a      | 0.9855      | -0.62525    | 47.27         | -0.2                           | 0.1                              | -4.5                                     | 0                                         | 0                                           | 4                                                   | 73                                        | 83                                          | 311                                                 |
| H6e      | 0.9900      | -0.62917    | 47.53         | 0.1                            | 0.0                              | 0.0                                      | 0                                         | 0                                           | 0                                                   | -14                                       | -23                                         | -8                                                  |
| C7       | 5.9352      | -38.01323   | 58.07         | -4.2                           | 0.0                              | 8.7                                      | 0                                         | 0                                           | 0                                                   | 24                                        | -66                                         | -23                                                 |
| H7e      | 0.9851      | -0.62725    | 47.34         | -0.1                           | 0.0                              | 1.3                                      | 0                                         | 0                                           | -1                                                  | -31                                       | -27                                         | -57                                                 |
| H7a      | 0.9829      | -0.62436    | 46.65         | -1.4                           | 0.1                              | -2.6                                     | 1                                         | 0                                           | 3                                                   | 45                                        | 23                                          | 188                                                 |
| N8       | 8.0348      | -55.35619   | 59.66         | -4.9                           | 0.8                              | 12.3                                     | 0                                         | 0                                           | 0                                                   | -18                                       | -13                                         | 1                                                   |
| H8       | 0.4828      | -0.39983    | 16.93         | -1.6                           | 0.0                              | -0.6                                     | 1                                         | 0                                           | 0                                                   | 106                                       | -6                                          | 7                                                   |
| C8       | 5.6624      | -37.85359   | 64.00         | -4.3                           | -0.4                             | 7.0                                      | 1                                         | 0                                           | 0                                                   | 71                                        | -50                                         | 13                                                  |
| Ha-(C8)  | 0.9443      | -0.60651    | 45.83         | 0.2                            | 0.0                              | 0.8                                      | 0                                         | 0                                           | -1                                                  | -29                                       | 52                                          | -50                                                 |
| Ha+(C8)  | 0.9434      | -0.60601    | 45.84         | -0.4                           | 0.0                              | 2.1                                      | 0                                         | 0                                           | -2                                                  | 21                                        | -40                                         | -104                                                |
| Hc(C8)   | 0.9558      | -0.61444    | 44.34         | 0.4                            | 0.0                              | 0.5                                      | 0                                         | 0                                           | 0                                                   | -5                                        | 28                                          | -73                                                 |

**Supplementary Table 2.2b** Integrated properties of heroin in HE2.

| Atom      | $N(\Omega)$ | $E(\Omega)$ | $v(\Omega)$ | $\Delta_{\text{def}}E(\Omega)$ | $-\Delta_{\text{BSSE}}E(\Omega)$ | $\Delta_{\text{b}}^{\text{CP}}E(\Omega)$ | $\Delta_{\text{def}}N(\Omega) \cdot 10^3$ | $-\Delta_{\text{BSSE}}N(\Omega) \cdot 10^3$ | $\Delta_{\text{b}}^{\text{CP}}N(\Omega) \cdot 10^3$ | $\Delta_{\text{def}}V(\Omega) \cdot 10^3$ | $-\Delta_{\text{BSSE}}V(\Omega) \cdot 10^3$ | $\Delta_{\text{b}}^{\text{CP}}V(\Omega) \cdot 10^3$ |
|-----------|-------------|-------------|-------------|--------------------------------|----------------------------------|------------------------------------------|-------------------------------------------|---------------------------------------------|-----------------------------------------------------|-------------------------------------------|---------------------------------------------|-----------------------------------------------------|
| C1        | 5.9924      | -38.03219   | 84.16       | -1.9                           | 0.0                              | 2.7                                      | -2                                        | 0                                           | -2                                                  | -148                                      | -3                                          | -129                                                |
| H1        | 0.9721      | -0.61544    | 48.56       | 0.2                            | 0.0                              | 2.8                                      | -1                                        | 0                                           | -3                                                  | -78                                       | -49                                         | -228                                                |
| C2        | 5.9643      | -38.03338   | 80.24       | 13.3                           | -0.6                             | 1.3                                      | -11                                       | 0                                           | 4                                                   | -1619                                     | -58                                         | 128                                                 |
| H2        | 0.9380      | -0.60767    | 43.55       | 13.3                           | 0.1                              | -18.0                                    | -24                                       | 0                                           | 15                                                  | -3676                                     | 5                                           | 798                                                 |
| C3        | 5.5077      | -37.77227   | 61.89       | 1.0                            | -0.6                             | -31.8                                    | 25                                        | 0                                           | 20                                                  | 2578                                      | -75                                         | 614                                                 |
| O3        | 9.1183      | -76.00082   | 99.45       | -136.8                         | -1.0                             | 31.5                                     | 25                                        | 0                                           | -10                                                 | -1874                                     | 13                                          | -443                                                |
| C1'       | 4.4426      | -37.04457   | 38.40       | 44.7                           | -3.4                             | 12.0                                     | -19                                       | 0                                           | -1                                                  | -190                                      | -52                                         | -301                                                |
| O1'       | 9.2210      | -76.00425   | 126.68      | 132.1                          | 2.8                              | -94.6                                    | -13                                       | 0                                           | 36                                                  | 958                                       | -264                                        | -7451                                               |
| C2'       | 5.9234      | -38.01355   | 70.15       | -10.2                          | -6.2                             | -9.6                                     | 0                                         | -1                                          | 6                                                   | -403                                      | -177                                        | 262                                                 |
| Ha-(C2')  | 0.9517      | -0.60264    | 46.64       | -5.5                           | -0.1                             | 15.9                                     | 5                                         | 0                                           | -15                                                 | 389                                       | -62                                         | -942                                                |
| Ha+(C2')  | 0.9503      | -0.60161    | 46.68       | -4.2                           | -0.1                             | 14.6                                     | 3                                         | 0                                           | -13                                                 | 87                                        | 85                                          | -909                                                |
| Hc(C2')   | 0.9500      | -0.60797    | 44.75       | 1.7                            | -0.3                             | -1.4                                     | -1                                        | 1                                           | -6                                                  | -56                                       | 137                                         | -1896                                               |
| C4        | 5.4916      | -37.84845   | 58.03       | 6.1                            | -0.2                             | 10.4                                     | 1                                         | 0                                           | -7                                                  | 2349                                      | 15                                          | -267                                                |
| O         | 8.9971      | -75.78898   | 103.84      | -8.0                           | 0.8                              | 0.3                                      | -2                                        | 0                                           | 0                                                   | 737                                       | -53                                         | 3                                                   |
| C5        | 5.5587      | -37.88132   | 41.44       | -6.9                           | 0.3                              | -6.5                                     | 5                                         | 0                                           | 4                                                   | 29                                        | 50                                          | 80                                                  |
| H5        | 0.9754      | -0.64581    | 41.37       | -2.1                           | 0.0                              | 1.3                                      | 0                                         | 0                                           | -1                                                  | -305                                      | -41                                         | -55                                                 |
| C6        | 5.4845      | -37.74557   | 44.38       | 11.9                           | 0.5                              | 4.1                                      | -8                                        | 0                                           | -2                                                  | -799                                      | -65                                         | 18                                                  |
| H6        | 0.9379      | -0.61313    | 42.63       | -12.5                          | 0.0                              | 3.5                                      | 12                                        | 0                                           | -3                                                  | 1395                                      | 6                                           | -198                                                |
| O6        | 9.0779      | -75.93062   | 100.53      | -10.9                          | 1.1                              | 1.0                                      | -1                                        | 0                                           | -2                                                  | -236                                      | 62                                          | -144                                                |
| C1''      | 4.4546      | -37.06264   | 38.81       | -7.5                           | 0.6                              | -3.7                                     | 2                                         | 1                                           | 2                                                   | 53                                        | 206                                         | 28                                                  |
| O1''      | 9.2008      | -76.01367   | 133.66      | -3.2                           | 1.1                              | -0.5                                     | 0                                         | 0                                           | 1                                                   | 370                                       | 28                                          | 58                                                  |
| C2''      | 5.9207      | -38.00503   | 70.64       | -1.8                           | 0.5                              | 0.5                                      | 0                                         | 0                                           | 0                                                   | 46                                        | 29                                          | 22                                                  |
| Hc(C2'')  | 0.9550      | -0.60709    | 46.54       | 1.2                            | 0.0                              | 0.8                                      | 0                                         | 0                                           | -1                                                  | 117                                       | -34                                         | -72                                                 |
| Ha-(C2'') | 0.9657      | -0.60952    | 47.29       | -5.7                           | 0.0                              | -0.9                                     | 1                                         | 0                                           | 1                                                   | -331                                      | -28                                         | 49                                                  |
| Ha+(C2'') | 0.9560      | -0.60297    | 47.27       | 5.8                            | 0.0                              | 6.7                                      | -3                                        | 0                                           | -6                                                  | 14                                        | 43                                          | -426                                                |
| C7        | 6.0076      | -38.06548   | 79.77       | -3.2                           | 0.2                              | 1.1                                      | -1                                        | 0                                           | -2                                                  | -61                                       | -7                                          | -134                                                |
| H7        | 0.9281      | -0.59796    | 45.11       | 2.3                            | 0.0                              | 7.4                                      | -2                                        | 0                                           | -7                                                  | -96                                       | 10                                          | -424                                                |
| C8        | 6.0257      | -38.04535   | 83.66       | -2.3                           | 0.2                              | -0.6                                     | -1                                        | 0                                           | 0                                                   | -287                                      | 66                                          | 9                                                   |
| H8        | 0.9585      | -0.60873    | 47.88       | 0.5                            | 0.0                              | 6.4                                      | -1                                        | 0                                           | -6                                                  | -17                                       | -13                                         | -444                                                |
| C9        | 5.7588      | -37.89155   | 48.46       | 1.5                            | 0.6                              | 0.3                                      | 0                                         | 0                                           | 0                                                   | 25                                        | -28                                         | 48                                                  |
| H9        | 0.9683      | -0.62637    | 46.15       | 0.2                            | 0.0                              | 8.0                                      | -1                                        | 0                                           | -7                                                  | -67                                       | -35                                         | -469                                                |
| C10       | 5.9300      | -37.99894   | 58.42       | -0.2                           | 0.1                              | -1.2                                     | 1                                         | 0                                           | 1                                                   | 94                                        | -74                                         | 57                                                  |
| H10e      | 0.9934      | -0.62968    | 46.38       | 0.4                            | 0.1                              | 4.2                                      | -1                                        | 0                                           | -4                                                  | -37                                       | 0                                           | -227                                                |
| H10a      | 0.9585      | -0.61233    | 46.67       | -0.7                           | 0.0                              | 7.0                                      | 0                                         | 0                                           | -6                                                  | -145                                      | 83                                          | -452                                                |
| C11       | 6.0159      | -38.10707   | 68.98       | -1.4                           | 0.3                              | 3.9                                      | 0                                         | 0                                           | -4                                                  | 138                                       | 49                                          | -253                                                |
| C12       | 6.0435      | -38.26481   | 59.84       | 8.7                            | 0.3                              | 3.3                                      | 3                                         | 0                                           | -4                                                  | 603                                       | -2                                          | -106                                                |
| C13       | 5.9564      | -38.12502   | 40.98       | 14.2                           | 0.1                              | 0.8                                      | 0                                         | 0                                           | -1                                                  | 123                                       | 42                                          | -8                                                  |
| C14       | 5.9471      | -38.05244   | 49.20       | -1.7                           | 0.3                              | 1.4                                      | 1                                         | 0                                           | 0                                                   | 58                                        | -29                                         | 35                                                  |
| H14       | 1.0244      | -0.66325    | 42.16       | -4.5                           | 0.0                              | 4.8                                      | 2                                         | 0                                           | -4                                                  | -245                                      | 16                                          | -238                                                |
| C15       | 5.9247      | -38.02332   | 55.81       | 5.1                            | 0.1                              | 0.8                                      | -3                                        | 0                                           | 0                                                   | -52                                       | -12                                         | -17                                                 |
| H15e      | 0.9557      | -0.61244    | 44.92       | -11.6                          | 0.0                              | -5.2                                     | 11                                        | 0                                           | 4                                                   | 742                                       | -4                                          | 243                                                 |
| H15a      | 0.9975      | -0.63012    | 48.16       | -0.7                           | 0.0                              | 7.5                                      | 0                                         | 0                                           | -7                                                  | 33                                        | -65                                         | -401                                                |
| C16       | 5.7297      | -37.90167   | 53.81       | 3.3                            | 0.0                              | 2.3                                      | -2                                        | 0                                           | -1                                                  | 65                                        | -63                                         | -61                                                 |
| H16e      | 0.9587      | -0.61828    | 45.79       | 0.1                            | 0.0                              | 4.4                                      | 0                                         | 0                                           | -4                                                  | 32                                        | -25                                         | -231                                                |
| H16a      | 0.9531      | -0.61972    | 42.44       | -0.1                           | 0.0                              | -8.2                                     | 1                                         | 0                                           | 7                                                   | 272                                       | 17                                          | 341                                                 |
| N17       | 7.9558      | -55.22503   | 58.84       | -9.9                           | 0.6                              | -1.5                                     | 1                                         | 0                                           | 2                                                   | 0                                         | -7                                          | 68                                                  |
| H17       | 0.5658      | -0.45138    | 27.23       | -0.2                           | 0.0                              | 6.4                                      | 0                                         | 0                                           | -4                                                  | -42                                       | -34                                         | -237                                                |
| C17       | 5.6728      | -37.86294   | 62.93       | -3.9                           | 0.1                              | -0.7                                     | 2                                         | 0                                           | 1                                                   | 278                                       | -79                                         | 21                                                  |
| Ha+(C17)  | 0.9424      | -0.60576    | 45.54       | 1.5                            | 0.0                              | 5.8                                      | -1                                        | 0                                           | -5                                                  | -44                                       | -11                                         | -282                                                |
| Ha-(C17)  | 0.9406      | -0.60540    | 45.35       | 0.4                            | 0.0                              | 4.0                                      | 0                                         | 0                                           | -4                                                  | -25                                       | -5                                          | -227                                                |
| Hc(C17)   | 0.9447      | -0.60935    | 43.87       | 1.4                            | 0.0                              | -5.2                                     | -1                                        | 0                                           | 4                                                   | -51                                       | 66                                          | 220                                                 |

**Supplementary Table 2.3a** Integrated properties of cocaine in MC1.

| Atom     | $N(\Omega)$ | $E(\Omega)$ | $v(\Omega)$ | $\Delta_{\text{def}}E(\Omega)$ | $-\Delta_{\text{BSSE}}E(\Omega)$ | $\Delta_{\text{b}}^{\text{CP}}E(\Omega)$ | $\Delta_{\text{def}}N(\Omega) \cdot 10^3$ | $-\Delta_{\text{BSSE}}N(\Omega) \cdot 10^3$ | $\Delta_{\text{b}}^{\text{CP}}N(\Omega) \cdot 10^3$ | $\Delta_{\text{def}}V(\Omega) \cdot 10^3$ | $-\Delta_{\text{BSSE}}V(\Omega) \cdot 10^3$ | $\Delta_{\text{b}}^{\text{CP}}V(\Omega) \cdot 10^3$ |
|----------|-------------|-------------|-------------|--------------------------------|----------------------------------|------------------------------------------|-------------------------------------------|---------------------------------------------|-----------------------------------------------------|-------------------------------------------|---------------------------------------------|-----------------------------------------------------|
| C1       | 5.7217      | -37.91513   | 46.87       | -3.1                           | 2.2                              | 4.8                                      | -1                                        | 1                                           | -2                                                  | -63                                       | 147                                         | -150                                                |
| H1       | 0.9599      | -0.62192    | 45.51       | -0.6                           | 0.4                              | 5.6                                      | 0                                         | 0                                           | -5                                                  | -50                                       | 21                                          | -313                                                |
| C2       | 5.9346      | -38.06797   | 48.10       | -0.3                           | -0.7                             | 7.3                                      | 0                                         | 0                                           | 0                                                   | 89                                        | -110                                        | 4                                                   |
| H2       | 0.9493      | -0.61574    | 44.25       | -0.6                           | 0.4                              | -1.0                                     | 0                                         | 0                                           | 1                                                   | 57                                        | -39                                         | 53                                                  |
| C1'      | 4.3826      | -37.02931   | 34.00       | 6.3                            | 0.4                              | 7.0                                      | -3                                        | 0                                           | -2                                                  | -20                                       | -27                                         | -21                                                 |
| O1'      | 9.2058      | -76.00379   | 123.22      | -15.1                          | 7.1                              | 12.2                                     | 1                                         | 1                                           | -5                                                  | 4                                         | 87                                          | -394                                                |
| O2'      | 9.0952      | -75.97521   | 101.14      | 1.9                            | 2.4                              | 10.6                                     | -1                                        | 0                                           | 2                                                   | -26                                       | 182                                         | -144                                                |
| C3'      | 5.5449      | -37.76596   | 63.11       | -7.8                           | 2.9                              | -2.1                                     | 4                                         | -1                                          | 4                                                   | 221                                       | -35                                         | 116                                                 |
| Ht(C3')  | 0.9390      | -0.60856    | 45.15       | 1.0                            | 0.7                              | 2.6                                      | -1                                        | -1                                          | -2                                                  | 11                                        | -91                                         | -156                                                |
| Hg+(C3') | 0.9438      | -0.60893    | 45.26       | -0.2                           | -0.7                             | 7.6                                      | 0                                         | 1                                           | -7                                                  | -92                                       | 145                                         | -591                                                |
| Hg-(C3') | 0.9495      | -0.61104    | 46.74       | 1.1                            | -0.8                             | 0.1                                      | -1                                        | 0                                           | 0                                                   | 321                                       | -33                                         | 32                                                  |
| C3       | 5.5144      | -37.76491   | 41.28       | -1.8                           | -5.9                             | -4.7                                     | 11                                        | 0                                           | 9                                                   | 648                                       | 48                                          | 102                                                 |
| H3       | 0.9511      | -0.62938    | 38.82       | 8.0                            | -0.2                             | -11.0                                    | -4                                        | -1                                          | 7                                                   | 556                                       | -440                                        | -321                                                |
| O3       | 9.0940      | -75.96156   | 94.52       | -74.3                          | 2.9                              | 27.9                                     | 14                                        | 0                                           | -8                                                  | -1038                                     | 427                                         | -751                                                |
| O1''     | 9.2315      | -76.01030   | 125.81      | 109.3                          | -7.0                             | -79.8                                    | -12                                       | 0                                           | 43                                                  | 2204                                      | -195                                        | -5708                                               |
| C1''     | 4.4857      | -37.08595   | 39.92       | 11.3                           | -9.3                             | 22.7                                     | -9                                        | 0                                           | 1                                                   | -273                                      | 18                                          | -145                                                |
| C1r      | 5.9883      | -38.09351   | 71.99       | -5.1                           | 1.0                              | 13.1                                     | -1                                        | 1                                           | -2                                                  | -120                                      | 27                                          | 34                                                  |
| C2r      | 5.9847      | -38.06890   | 80.66       | -0.8                           | -3.2                             | 5.3                                      | -1                                        | -1                                          | 3                                                   | 9                                         | 40                                          | -77                                                 |
| H2r      | 0.9600      | -0.61440    | 45.67       | 0.5                            | 0.7                              | -19.8                                    | -1                                        | 0                                           | 19                                                  | 9                                         | -48                                         | 1225                                                |
| C3r      | 5.9817      | -38.05246   | 82.90       | -3.9                           | -0.9                             | 8.8                                      | 0                                         | 0                                           | -2                                                  | 194                                       | -108                                        | -169                                                |
| H3r      | 0.9676      | -0.61568    | 47.77       | -0.4                           | 0.1                              | 0.9                                      | 0                                         | 0                                           | -1                                                  | 42                                        | 15                                          | -98                                                 |
| C4r      | 5.9819      | -38.05524   | 82.08       | -3.1                           | 1.4                              | 7.4                                      | 1                                         | 0                                           | -6                                                  | 100                                       | 110                                         | -580                                                |
| H4r      | 0.9567      | -0.61171    | 47.07       | -1.1                           | 0.1                              | 12.0                                     | 1                                         | 0                                           | -11                                                 | 25                                        | -15                                         | -797                                                |
| C5r      | 5.9817      | -38.05256   | 82.86       | -6.6                           | 2.1                              | 10.4                                     | 1                                         | 0                                           | -7                                                  | 73                                        | -36                                         | -454                                                |
| H5r      | 0.9668      | -0.61536    | 47.70       | -2.5                           | 0.5                              | 13.4                                     | 2                                         | 0                                           | -13                                                 | 101                                       | -40                                         | -970                                                |
| C6r      | 5.9853      | -38.06673   | 80.56       | -6.2                           | 0.4                              | 9.3                                      | 1                                         | 0                                           | -6                                                  | 2                                         | 8                                           | -436                                                |
| H6r      | 0.9676      | -0.62101    | 47.12       | -4.8                           | 0.2                              | 10.0                                     | 3                                         | 1                                           | -10                                                 | 318                                       | 78                                          | -681                                                |
| C4       | 5.9322      | -38.05011   | 55.08       | 9.1                            | -1.7                             | 7.1                                      | -2                                        | 0                                           | 0                                                   | 165                                       | 36                                          | -175                                                |
| H4a      | 0.9743      | -0.62061    | 45.41       | 3.2                            | -0.8                             | 2.3                                      | -3                                        | 0                                           | -2                                                  | -105                                      | -104                                        | 35                                                  |
| H4e      | 0.9615      | -0.61556    | 46.15       | -2.7                           | -0.6                             | -7.7                                     | 4                                         | 1                                           | 4                                                   | 1052                                      | 269                                         | -89                                                 |
| C5       | 5.7204      | -37.91147   | 48.01       | -1.6                           | -1.0                             | 11.3                                     | -1                                        | 1                                           | -3                                                  | -103                                      | 94                                          | -26                                                 |
| H5       | 0.9623      | -0.62236    | 45.76       | -0.4                           | 0.0                              | 2.4                                      | 0                                         | 0                                           | -2                                                  | 12                                        | 68                                          | -135                                                |
| C6       | 5.9450      | -38.02379   | 58.63       | 1.1                            | -2.7                             | -10.8                                    | 0                                         | -1                                          | 9                                                   | 171                                       | -28                                         | 374                                                 |
| H6a      | 0.9433      | -0.60925    | 42.63       | 1.1                            | 0.7                              | 22.8                                     | 0                                         | 0                                           | -25                                                 | 10                                        | -3                                          | -3408                                               |
| H6e      | 0.9930      | -0.63031    | 47.79       | 1.0                            | -0.4                             | -1.8                                     | -1                                        | 0                                           | 2                                                   | -63                                       | 30                                          | 188                                                 |
| C7       | 5.9361      | -38.01588   | 58.09       | -2.3                           | 1.6                              | 5.0                                      | 0                                         | 0                                           | 0                                                   | 91                                        | -36                                         | 31                                                  |
| H7e      | 0.9847      | -0.62729    | 47.27       | 0.0                            | 0.3                              | 2.3                                      | 0                                         | 0                                           | -2                                                  | -33                                       | -25                                         | -175                                                |
| H7a      | 0.9817      | -0.62365    | 46.73       | 1.9                            | -0.4                             | -5.7                                     | -1                                        | 0                                           | 6                                                   | 143                                       | -136                                        | 642                                                 |
| N8       | 8.0341      | -55.35806   | 59.70       | -4.8                           | 6.5                              | 3.3                                      | 0                                         | -1                                          | 1                                                   | 15                                        | 99                                          | -96                                                 |
| H8       | 0.4851      | -0.40157    | 17.12       | 0.7                            | -1.3                             | 0.7                                      | 0                                         | 1                                           | -1                                                  | 38                                        | 101                                         | -117                                                |
| C8       | 5.6642      | -37.85724   | 63.99       | -5.0                           | 0.2                              | 4.2                                      | 2                                         | -1                                          | 1                                                   | 151                                       | -91                                         | 38                                                  |
| Ha-(C8)  | 0.9421      | -0.60559    | 45.58       | 0.6                            | 0.0                              | 3.1                                      | -1                                        | 0                                           | -3                                                  | 17                                        | -114                                        | -213                                                |
| Ha+(C8)  | 0.9419      | -0.60538    | 45.76       | 0.0                            | 0.2                              | 4.9                                      | 0                                         | 0                                           | -4                                                  | -5                                        | 1                                           | -274                                                |
| Hc(C8)   | 0.9535      | -0.61355    | 44.20       | 0.5                            | 0.1                              | 1.3                                      | -1                                        | 0                                           | -1                                                  | 25                                        | -15                                         | -82                                                 |

**Supplementary Table 2.3b** Integrated properties of morphine in MC1.

| Atom     | $N(\Omega)$ | $E(\Omega)$ | $\nu(\Omega)$ | $\Delta_{\text{def}}E(\Omega)$ | $-\Delta_{\text{BSSE}}E(\Omega)$ | $\Delta_{\text{b}}^{\text{CP}}E(\Omega)$ | $\Delta_{\text{def}}N(\Omega)10^3$ | $-\Delta_{\text{BSSE}}N(\Omega) \cdot 10^3$ | $\Delta_{\text{b}}^{\text{CP}}N(\Omega) \cdot 10^3$ | $\Delta_{\text{def}}V(\Omega) \cdot 10^3$ | $-\Delta_{\text{BSSE}}V(\Omega) \cdot 10^3$ | $\Delta_{\text{b}}^{\text{CP}}V(\Omega) \cdot 10^3$ |
|----------|-------------|-------------|---------------|--------------------------------|----------------------------------|------------------------------------------|------------------------------------|---------------------------------------------|-----------------------------------------------------|-------------------------------------------|---------------------------------------------|-----------------------------------------------------|
| C1       | 5.9923      | -38.03414   | 83.83         | -5.2                           | -0.2                             | 0.4                                      | 0                                  | 0                                           | -2                                                  | -89                                       | 33                                          | -60                                                 |
| H1       | 0.9709      | -0.61502    | 48.52         | -0.4                           | 0.0                              | 5.6                                      | 0                                  | 0                                           | -5                                                  | 24                                        | -72                                         | -332                                                |
| C2       | 5.9785      | -38.03813   | 82.72         | -4.4                           | -0.5                             | 0.4                                      | 0                                  | 0                                           | 0                                                   | 30                                        | 24                                          | -26                                                 |
| H2       | 0.9397      | -0.60275    | 46.08         | 0.2                            | 0.1                              | 3.3                                      | 0                                  | 0                                           | -3                                                  | -9                                        | 40                                          | -209                                                |
| C3       | 5.4166      | -37.72356   | 59.40         | -8.3                           | -0.9                             | -2.9                                     | 2                                  | 0                                           | 3                                                   | 61                                        | 39                                          | 110                                                 |
| O3       | 9.1316      | -75.88167   | 121.93        | -1.7                           | 3.9                              | -1.3                                     | -2                                 | 0                                           | -1                                                  | 27                                        | -41                                         | -32                                                 |
| H(O3)    | 0.3869      | -0.34748    | 20.20         | -0.8                           | 0.3                              | -7.1                                     | 0                                  | 0                                           | 5                                                   | -40                                       | 32                                          | 247                                                 |
| C4       | 5.5705      | -37.89597   | 60.48         | -10.8                          | 2.2                              | -4.8                                     | 5                                  | -1                                          | 4                                                   | 78                                        | 14                                          | 93                                                  |
| O        | 9.0173      | -75.77209   | 106.07        | 13.8                           | 1.2                              | -3.7                                     | -4                                 | 1                                           | 7                                                   | 57                                        | 28                                          | 390                                                 |
| C5       | 5.5650      | -37.88149   | 41.75         | 0.2                            | -0.8                             | -0.4                                     | -1                                 | -1                                          | 2                                                   | -112                                      | -80                                         | 60                                                  |
| H5       | 0.9855      | -0.64938    | 42.67         | -1.6                           | -0.7                             | 8.1                                      | 0                                  | 0                                           | -8                                                  | -66                                       | -111                                        | 216                                                 |
| C6       | 5.4160      | -37.68826   | 44.54         | -4.9                           | -7.8                             | 5.3                                      | 7                                  | 0                                           | 0                                                   | 362                                       | -45                                         | -114                                                |
| H6       | 0.9807      | -0.63058    | 47.84         | 2.8                            | 1.2                              | -14.5                                    | -1                                 | 0                                           | 11                                                  | 11                                        | 28                                          | 609                                                 |
| O6       | 9.1622      | -75.82916   | 124.98        | 55.1                           | -0.1                             | -115.9                                   | -6                                 | -1                                          | 75                                                  | 247                                       | -328                                        | 3259                                                |
| H(O6)    | 0.3745      | -0.33917    | 14.27         | 3.6                            | -1.5                             | 58.6                                     | 3                                  | 1                                           | -45                                                 | 389                                       | 283                                         | -8905                                               |
| C7       | 6.0290      | -38.07800   | 81.18         | -3.5                           | -7.5                             | 5.8                                      | -1                                 | -1                                          | -1                                                  | -128                                      | 113                                         | 125                                                 |
| H7       | 0.9534      | -0.60740    | 47.08         | -1.3                           | 1.1                              | -11.4                                    | 0                                  | 0                                           | 10                                                  | 33                                        | -101                                        | 800                                                 |
| C8       | 6.0265      | -38.04937   | 83.61         | -7.1                           | -3.3                             | 4.9                                      | 0                                  | 0                                           | -5                                                  | -38                                       | -88                                         | -196                                                |
| H8       | 0.9626      | -0.61027    | 48.23         | -0.8                           | 0.1                              | 3.0                                      | 1                                  | 0                                           | -3                                                  | 55                                        | -56                                         | -219                                                |
| C9       | 5.7593      | -37.89440   | 48.40         | -1.9                           | 0.7                              | 2.0                                      | -1                                 | -1                                          | 0                                                   | 1                                         | 1                                           | 58                                                  |
| H9       | 0.9722      | -0.62802    | 46.42         | -0.4                           | 0.3                              | 3.6                                      | 0                                  | 0                                           | -3                                                  | -42                                       | 48                                          | -259                                                |
| C10      | 5.9262      | -37.99913   | 58.23         | -5.0                           | 1.1                              | -0.4                                     | 0                                  | 0                                           | 0                                                   | 7                                         | -27                                         | 76                                                  |
| H10e     | 0.9934      | -0.63002    | 46.33         | -1.1                           | -0.2                             | 6.5                                      | 0                                  | 0                                           | -6                                                  | -107                                      | 73                                          | -304                                                |
| H10a     | 0.9673      | -0.61604    | 47.35         | -0.3                           | 0.1                              | -0.3                                     | 0                                  | 0                                           | 0                                                   | -15                                       | -12                                         | 37                                                  |
| C11      | 6.0215      | -38.10776   | 69.53         | -3.4                           | -0.4                             | 1.0                                      | 0                                  | 0                                           | -2                                                  | -35                                       | 20                                          | -177                                                |
| C12      | 6.0427      | -38.26755   | 59.17         | -2.4                           | 3.0                              | -0.6                                     | 0                                  | 0                                           | -1                                                  | -7                                        | 34                                          | -7                                                  |
| C13      | 5.9577      | -38.12462   | 41.10         | 0.6                            | 3.2                              | -2.6                                     | 1                                  | -1                                          | 0                                                   | 90                                        | 47                                          | -41                                                 |
| C14      | 5.9463      | -38.05378   | 49.09         | -3.6                           | -0.4                             | 0.7                                      | 0                                  | 0                                           | -1                                                  | -87                                       | 12                                          | -48                                                 |
| H14      | 1.0267      | -0.66311    | 42.68         | 1.2                            | -1.5                             | 3.1                                      | 0                                  | 0                                           | -2                                                  | 141                                       | -115                                        | 70                                                  |
| C15      | 5.9253      | -38.02542   | 55.68         | -1.7                           | 2.1                              | -2.7                                     | 0                                  | 0                                           | 0                                                   | 43                                        | 54                                          | -128                                                |
| H15e     | 0.9580      | -0.61375    | 44.83         | -0.4                           | 0.3                              | -2.2                                     | 0                                  | 0                                           | 1                                                   | -6                                        | 51                                          | 6                                                   |
| H15a     | 1.0098      | -0.63487    | 48.99         | -0.1                           | 0.1                              | -3.0                                     | 0                                  | 0                                           | 3                                                   | 28                                        | 52                                          | 137                                                 |
| C16      | 5.7291      | -37.90338   | 53.84         | -1.8                           | 1.3                              | 1.0                                      | -1                                 | 1                                           | -1                                                  | -56                                       | 78                                          | -37                                                 |
| H16e     | 0.9598      | -0.61879    | 45.90         | -0.6                           | 0.1                              | 4.5                                      | 0                                  | 0                                           | -4                                                  | -2                                        | -34                                         | -209                                                |
| H16a     | 0.9437      | -0.61589    | 41.75         | -0.2                           | 0.2                              | 1.6                                      | 0                                  | 0                                           | -2                                                  | 133                                       | 23                                          | -164                                                |
| N17      | 7.9538      | -55.22399   | 58.76         | 1.4                            | -0.7                             | 1.7                                      | -1                                 | 1                                           | 0                                                   | -14                                       | 108                                         | -141                                                |
| H17      | 0.5694      | -0.45352    | 27.52         | 0.3                            | 0.1                              | 0.6                                      | 0                                  | 0                                           | -1                                                  | 10                                        | -6                                          | -36                                                 |
| C17      | 5.6744      | -37.86579   | 62.84         | -5.7                           | 2.0                              | -2.3                                     | 2                                  | 0                                           | 1                                                   | -48                                       | 202                                         | -15                                                 |
| Ha+(C17) | 0.9440      | -0.60656    | 45.51         | 0.1                            | 0.3                              | 3.4                                      | 0                                  | 0                                           | -3                                                  | -46                                       | 72                                          | -301                                                |
| Ha-(C17) | 0.9406      | -0.60545    | 45.45         | 0.0                            | 0.1                              | 4.7                                      | 0                                  | 0                                           | -4                                                  | -8                                        | 36                                          | -166                                                |
| Hc(C17)  | 0.9382      | -0.60672    | 43.51         | 0.3                            | -0.3                             | 1.6                                      | 0                                  | 0                                           | -2                                                  | 22                                        | -9                                          | -76                                                 |

**Supplementary Table 2.4a** Integrated properties of cocaine in MC2.

| Atom     | $N(\Omega)$ | $E(\Omega)$ | $\nu(\Omega)$ | $\Delta_{\text{def}}E(\Omega)$ | $-\Delta_{\text{BSSE}}E(\Omega)$ | $\Delta_{\text{b}}^{\text{CP}}E(\Omega)$ | $\Delta_{\text{def}}N(\Omega) \cdot 10^3$ | $-\Delta_{\text{BSSE}}N(\Omega) \cdot 10^3$ | $\Delta_{\text{b}}^{\text{CP}}N(\Omega) \cdot 10^3$ | $\Delta_{\text{def}}V(\Omega) \cdot 10^3$ | $-\Delta_{\text{BSSE}}V(\Omega) \cdot 10^3$ | $\Delta_{\text{b}}^{\text{CP}}V(\Omega) \cdot 10^3$ |
|----------|-------------|-------------|---------------|--------------------------------|----------------------------------|------------------------------------------|-------------------------------------------|---------------------------------------------|-----------------------------------------------------|-------------------------------------------|---------------------------------------------|-----------------------------------------------------|
| C1       | 5.7195      | -37.91069   | 46.70         | 7.5                            | 2.0                              | 6.0                                      | -3                                        | 0                                           | -1                                                  | -257                                      | 57                                          | -35                                                 |
| H1       | 0.9645      | -0.62385    | 45.80         | 3.4                            | 0.0                              | -3.1                                     | -3                                        | 0                                           | 3                                                   | -228                                      | 10                                          | 164                                                 |
| C2       | 5.9319      | -38.06967   | 47.77         | -4.8                           | -1.8                             | 8.4                                      | -2                                        | 0                                           | -1                                                  | -342                                      | -42                                         | 36                                                  |
| H2       | 0.9488      | -0.61727    | 43.63         | -8.9                           | -0.2                             | 3.9                                      | 4                                         | 0                                           | -4                                                  | -296                                      | 10                                          | -269                                                |
| C1'      | 4.3828      | -37.02820   | 33.95         | 11.7                           | -6.2                             | 11.1                                     | -7                                        | 0                                           | 2                                                   | -41                                       | -25                                         | -58                                                 |
| O1'      | 9.2373      | -76.00443   | 123.87        | 49.9                           | 1.2                              | -48.6                                    | 2                                         | 0                                           | 27                                                  | 4811                                      | -118                                        | -4335                                               |
| O2'      | 9.0936      | -75.97954   | 100.40        | -17.1                          | 1.7                              | 18.9                                     | 6                                         | 0                                           | -7                                                  | -433                                      | 50                                          | -354                                                |
| C3'      | 5.5329      | -37.75816   | 62.76         | 8.2                            | 1.4                              | 3.9                                      | -6                                        | 0                                           | 0                                                   | 10                                        | -16                                         | -47                                                 |
| Ht(C3')  | 0.9373      | -0.60778    | 45.08         | -4.7                           | 0.1                              | 11.1                                     | 4                                         | 0                                           | -10                                                 | 269                                       | -43                                         | -536                                                |
| Hg+(C3') | 0.9557      | -0.61374    | 46.02         | -0.2                           | 0.0                              | -5.9                                     | 0                                         | 0                                           | 5                                                   | -46                                       | 4                                           | 280                                                 |
| Hg-(C3') | 0.9578      | -0.61403    | 47.49         | -1.6                           | 0.0                              | -6.0                                     | 3                                         | 0                                           | 5                                                   | 654                                       | 62                                          | 343                                                 |
| C3       | 5.4946      | -37.75608   | 40.62         | 8.7                            | 0.0                              | 2.1                                      | -1                                        | 0                                           | 1                                                   | 73                                        | 7                                           | 52                                                  |
| H3       | 0.9510      | -0.62855    | 39.82         | -5.5                           | -0.1                             | 4.6                                      | 6                                         | 0                                           | -4                                                  | 936                                       | 11                                          | -157                                                |
| O3       | 9.0866      | -75.93920   | 95.43         | 7.7                            | 2.9                              | 4.4                                      | -4                                        | 0                                           | 4                                                   | -529                                      | -46                                         | 124                                                 |
| O1''     | 9.2010      | -76.01626   | 128.99        | -7.4                           | 3.2                              | 11.1                                     | 1                                         | 0                                           | -1                                                  | -406                                      | -93                                         | -20                                                 |
| C1''     | 4.4954      | -37.09603   | 40.33         | -4.9                           | 0.4                              | 2.9                                      | 0                                         | 1                                           | 1                                                   | -125                                      | 70                                          | 60                                                  |
| C1r      | 5.9911      | -38.09554   | 72.13         | -1.5                           | 1.3                              | 3.8                                      | 0                                         | 0                                           | 1                                                   | 6                                         | -7                                          | 78                                                  |
| C2r      | 5.9838      | -38.06770   | 80.69         | -1.7                           | 1.8                              | 4.4                                      | 0                                         | 0                                           | 0                                                   | 107                                       | -96                                         | -8                                                  |
| H2r      | 0.9425      | -0.60723    | 44.55         | -0.7                           | 0.1                              | 0.9                                      | 1                                         | 0                                           | -1                                                  | 82                                        | 18                                          | -36                                                 |
| C3r      | 5.9826      | -38.05211   | 82.92         | -2.2                           | 1.8                              | 5.3                                      | 0                                         | 0                                           | -1                                                  | 141                                       | -140                                        | -57                                                 |
| H3r      | 0.9646      | -0.61450    | 47.53         | -0.2                           | 0.0                              | 4.0                                      | 0                                         | 0                                           | -4                                                  | 16                                        | -39                                         | -256                                                |
| C4r      | 5.9861      | -38.05540   | 82.52         | -2.0                           | 1.8                              | 5.4                                      | 0                                         | 0                                           | -1                                                  | 65                                        | 47                                          | -46                                                 |
| H4r      | 0.9635      | -0.61428    | 47.53         | -0.2                           | 0.0                              | 4.3                                      | 0                                         | 0                                           | -4                                                  | -1                                        | -34                                         | -303                                                |
| C5r      | 5.9886      | -38.05339   | 83.29         | -2.0                           | 1.2                              | 4.4                                      | 0                                         | 0                                           | 0                                                   | 74                                        | -57                                         | -4                                                  |
| H5r      | 0.9776      | -0.61939    | 48.55         | 0.1                            | 0.0                              | 0.6                                      | 0                                         | 0                                           | -1                                                  | -39                                       | 26                                          | -45                                                 |
| C6r      | 5.9922      | -38.06666   | 81.18         | -1.3                           | 1.4                              | 3.7                                      | 0                                         | 0                                           | 2                                                   | 47                                        | 47                                          | 95                                                  |
| H6r      | 0.9773      | -0.62430    | 47.93         | 1.6                            | 0.0                              | -4.9                                     | -2                                        | 0                                           | 5                                                   | 83                                        | 125                                         | 319                                                 |
| C4       | 5.9345      | -38.05631   | 55.01         | -5.7                           | -3.5                             | 7.4                                      | 1                                         | 0                                           | -1                                                  | 106                                       | -89                                         | -60                                                 |
| H4a      | 0.9913      | -0.62643    | 47.53         | 0.0                            | -0.2                             | -10.4                                    | 3                                         | 0                                           | 9                                                   | 906                                       | 22                                          | 1021                                                |
| H4e      | 0.9496      | -0.61134    | 44.20         | 4.5                            | -0.1                             | -4.3                                     | -6                                        | 0                                           | 4                                                   | -989                                      | 39                                          | 230                                                 |
| C5       | 5.7271      | -37.91973   | 48.28         | -13.7                          | -0.4                             | 1.1                                      | 2                                         | -1                                          | 2                                                   | -143                                      | 143                                         | 233                                                 |
| H5       | 0.9439      | -0.61511    | 46.58         | -0.7                           | -0.3                             | 22.1                                     | 0                                         | 0                                           | -21                                                 | -84                                       | 53                                          | 804                                                 |
| C6       | 5.9371      | -38.01837   | 58.15         | -2.2                           | -1.1                             | 5.3                                      | 1                                         | 0                                           | 0                                                   | 34                                        | 14                                          | -18                                                 |
| H6a      | 0.9718      | -0.62016    | 46.09         | 0.2                            | -0.2                             | -3.9                                     | -1                                        | 0                                           | 4                                                   | -185                                      | 49                                          | 190                                                 |
| H6e      | 0.9924      | -0.63026    | 47.76         | 0.9                            | 0.0                              | -2.0                                     | -1                                        | 0                                           | 2                                                   | -93                                       | 5                                           | 207                                                 |
| C7       | 5.9357      | -38.01730   | 57.79         | -4.3                           | -0.5                             | 5.4                                      | 1                                         | 0                                           | 0                                                   | -208                                      | -19                                         | 8                                                   |
| H7e      | 0.9873      | -0.62862    | 47.08         | -2.6                           | 0.0                              | 1.7                                      | 1                                         | 0                                           | -1                                                  | -242                                      | -98                                         | -81                                                 |
| H7a      | 0.9759      | -0.62193    | 46.10         | 1.4                            | -0.2                             | -0.9                                     | -2                                        | 0                                           | 1                                                   | -57                                       | 37                                          | 42                                                  |
| N8       | 8.0193      | -55.34322   | 58.49         | 40.2                           | 1.4                              | 2.3                                      | -15                                       | 0                                           | 1                                                   | -419                                      | 5                                           | -773                                                |
| H8       | 0.4970      | -0.40890    | 16.67         | -26.1                          | -1.2                             | 8.2                                      | 21                                        | 0                                           | -9                                                  | 3737                                      | 11                                          | -4182                                               |
| C8       | 5.6664      | -37.86762   | 62.58         | -19.5                          | -7.2                             | -1.1                                     | 4                                         | -1                                          | 2                                                   | -90                                       | 15                                          | -1242                                               |
| Ha-(C8)  | 0.9204      | -0.60002    | 41.40         | -2.6                           | -0.8                             | 21.8                                     | 0                                         | 1                                           | -26                                                 | -310                                      | 85                                          | -4270                                               |
| Ha+(C8)  | 0.9519      | -0.61006    | 46.49         | 2.9                            | -0.5                             | -9.7                                     | -4                                        | 1                                           | 8                                                   | -209                                      | -7                                          | 671                                                 |
| Hc(C8)   | 0.9632      | -0.61873    | 44.03         | 1.6                            | -0.5                             | -12.9                                    | -4                                        | 0                                           | 11                                                  | -809                                      | 21                                          | 550                                                 |



**Supplementary Table 2.4b** Integrated properties of morphine in MC2.

| Atom     | $N(\Omega)$ | $E(\Omega)$ | $\nu(\Omega)$ | $\Delta_{\text{def}}E(\Omega)$ | $-\Delta_{\text{BSSE}}E(\Omega)$ | $\Delta_{\text{b}}^{\text{CP}}E(\Omega)$ | $\Delta_{\text{def}}N(\Omega)10^3$ | $-\Delta_{\text{BSSE}}N(\Omega) \cdot 10^3$ | $\Delta_{\text{b}}^{\text{CP}}N(\Omega) \cdot 10^3$ | $\Delta_{\text{def}}V(\Omega) \cdot 10^3$ | $-\Delta_{\text{BSSE}}V(\Omega) \cdot 10^3$ | $\Delta_{\text{b}}^{\text{CP}}V(\Omega) \cdot 10^3$ |
|----------|-------------|-------------|---------------|--------------------------------|----------------------------------|------------------------------------------|------------------------------------|---------------------------------------------|-----------------------------------------------------|-------------------------------------------|---------------------------------------------|-----------------------------------------------------|
| C1       | 5.9849      | -38.03163   | 83.32         | -6.0                           | 0.1                              | 7.2                                      | 1                                  | 0                                           | -9                                                  | 82                                        | 7                                           | -570                                                |
| H1       | 0.9635      | -0.61224    | 48.04         | -1.7                           | 0.0                              | 15.8                                     | 1                                  | 0                                           | -16                                                 | 33                                        | 52                                          | -1118                                               |
| C2       | 5.9918      | -38.03920   | 83.27         | -7.5                           | -1.9                             | 12.2                                     | -4                                 | 0                                           | -6                                                  | -243                                      | 182                                         | -299                                                |
| H2       | 0.9653      | -0.61233    | 47.68         | 3.3                            | 0.3                              | 9.0                                      | -3                                 | 0                                           | -9                                                  | -129                                      | 21                                          | -611                                                |
| C3       | 5.4424      | -37.73835   | 60.20         | -39.6                          | -6.3                             | -28.5                                    | 15                                 | -2                                          | 20                                                  | 300                                       | 2                                           | 542                                                 |
| O3       | 9.1709      | -75.89803   | 115.97        | 67.8                           | -0.4                             | -103.5                                   | -8                                 | 1                                           | 50                                                  | 400                                       | -139                                        | -5721                                               |
| H(O3)    | 0.3676      | -0.33393    | 18.42         | 4.0                            | 2.4                              | 38.3                                     | 0                                  | 0                                           | -25                                                 | 116                                       | 95                                          | -2606                                               |
| C4       | 5.5431      | -37.88029   | 59.67         | -32.9                          | -3.3                             | -23.8                                    | 10                                 | 0                                           | 18                                                  | 194                                       | -53                                         | 373                                                 |
| O        | 9.0185      | -75.77631   | 104.90        | 65.9                           | 5.4                              | -55.4                                    | -19                                | 1                                           | 45                                                  | 336                                       | -137                                        | 1448                                                |
| C5       | 5.5590      | -37.88635   | 41.04         | -20.9                          | -0.5                             | -16.3                                    | 6                                  | 0                                           | 11                                                  | -185                                      | 255                                         | 138                                                 |
| H5       | 0.9741      | -0.64529    | 41.20         | -4.6                           | 0.0                              | -1.8                                     | 1                                  | 0                                           | 2                                                   | -352                                      | -18                                         | 84                                                  |
| C6       | 5.4387      | -37.70116   | 45.42         | -29.8                          | 0.2                              | -6.4                                     | 10                                 | 1                                           | 7                                                   | 38                                        | 119                                         | 150                                                 |
| H6       | 0.9883      | -0.63100    | 48.77         | 0.2                            | 0.0                              | 8.5                                      | -1                                 | 0                                           | -8                                                  | -29                                       | 28                                          | -487                                                |
| O6       | 9.1139      | -75.80635   | 125.35        | 31.6                           | -1.9                             | -17.3                                    | -12                                | 0                                           | 25                                                  | -161                                      | 41                                          | 3154                                                |
| H(O6)    | 0.4027      | -0.35611    | 21.26         | -5.8                           | -0.1                             | 12.9                                     | 6                                  | 0                                           | -9                                                  | 609                                       | -32                                         | -547                                                |
| C7       | 6.0266      | -38.07275   | 80.70         | -4.0                           | -3.5                             | 4.2                                      | 1                                  | 0                                           | 2                                                   | -24                                       | -116                                        | 182                                                 |
| H7       | 0.9485      | -0.60541    | 46.65         | -6.3                           | 0.1                              | 8.1                                      | 7                                  | 0                                           | -8                                                  | 591                                       | 8                                           | -567                                                |
| C8       | 6.0211      | -38.04632   | 83.39         | -3.6                           | -0.9                             | 6.6                                      | -3                                 | 0                                           | -6                                                  | -328                                      | 118                                         | -416                                                |
| H8       | 0.9539      | -0.60695    | 47.60         | -0.8                           | 0.1                              | 14.1                                     | 0                                  | 0                                           | -14                                                 | -128                                      | 19                                          | -946                                                |
| C9       | 5.7576      | -37.89352   | 48.35         | 0.9                            | 0.7                              | 4.6                                      | -2                                 | 0                                           | -1                                                  | -14                                       | -12                                         | 58                                                  |
| H9       | 0.9661      | -0.62552    | 45.96         | -1.1                           | 0.0                              | 12.7                                     | 0                                  | 0                                           | -11                                                 | -64                                       | 2                                           | -770                                                |
| C10      | 5.9281      | -37.99971   | 58.46         | -5.4                           | 1.1                              | -0.2                                     | 0                                  | 0                                           | 1                                                   | 41                                        | 56                                          | 161                                                 |
| H10e     | 0.9885      | -0.62802    | 46.05         | -1.1                           | -0.1                             | 13.2                                     | 0                                  | 0                                           | -12                                                 | -107                                      | -30                                         | -649                                                |
| H10a     | 0.9605      | -0.61338    | 46.80         | -1.5                           | 0.0                              | 7.8                                      | 1                                  | 0                                           | -7                                                  | 8                                         | -12                                         | -507                                                |
| C11      | 6.0155      | -38.10452   | 69.36         | -0.1                           | 0.8                              | 9.8                                      | 0                                  | 0                                           | -8                                                  | 411                                       | -19                                         | -388                                                |
| C12      | 6.0404      | -38.26392   | 59.41         | 1.4                            | 0.4                              | 9.3                                      | -1                                 | 0                                           | -6                                                  | 341                                       | -23                                         | -223                                                |
| C13      | 5.9564      | -38.12322   | 41.06         | 5.8                            | 0.4                              | 5.3                                      | -2                                 | -1                                          | -1                                                  | 100                                       | -70                                         | 6                                                   |
| C14      | 5.9472      | -38.05330   | 49.17         | -2.1                           | 0.6                              | 3.4                                      | 1                                  | 0                                           | 0                                                   | 78                                        | -44                                         | 52                                                  |
| H14      | 1.0223      | -0.66180    | 42.31         | 0.5                            | -0.1                             | 9.0                                      | -1                                 | 0                                           | -8                                                  | -8                                        | -11                                         | -428                                                |
| C15      | 5.9255      | -38.02397   | 55.80         | 0.6                            | 0.2                              | 2.4                                      | -1                                 | 0                                           | 1                                                   | 133                                       | -19                                         | -3                                                  |
| H15e     | 0.9621      | -0.61534    | 45.23         | 1.2                            | -0.1                             | -9.7                                     | 0                                  | 0                                           | 8                                                   | 266                                       | 12                                          | 361                                                 |
| H15a     | 1.0032      | -0.63245    | 48.51         | 0.5                            | 0.0                              | 6.4                                      | -1                                 | 0                                           | -6                                                  | -59                                       | -3                                          | -439                                                |
| C16      | 5.7277      | -37.90148   | 53.80         | 0.1                            | 0.9                              | 5.4                                      | -2                                 | 0                                           | -2                                                  | -50                                       | 30                                          | -12                                                 |
| H16e     | 0.9549      | -0.61668    | 45.62         | 0.0                            | 0.1                              | 11.7                                     | -1                                 | 0                                           | -10                                                 | -16                                       | 15                                          | -614                                                |
| H16a     | 0.9481      | -0.61775    | 42.12         | -0.1                           | 0.0                              | -2.0                                     | 1                                  | 0                                           | 1                                                   | 293                                       | 56                                          | 9                                                   |
| N17      | 7.9556      | -55.22459   | 58.91         | -1.2                           | 1.8                              | 0.4                                      | -2                                 | 0                                           | 3                                                   | -76                                       | 58                                          | 76                                                  |
| H17      | 0.5656      | -0.45140    | 27.30         | 1.0                            | -0.1                             | 6.7                                      | 0                                  | 0                                           | -5                                                  | 12                                        | 7                                           | -317                                                |
| C17      | 5.6765      | -37.86635   | 62.89         | -9.3                           | 1.9                              | -1.2                                     | 4                                  | 0                                           | 2                                                   | 142                                       | -7                                          | 110                                                 |
| Ha+(C17) | 0.9403      | -0.60508    | 45.27         | 0.2                            | 0.0                              | 8.5                                      | -1                                 | 0                                           | -8                                                  | -99                                       | 43                                          | -480                                                |
| Ha-(C17) | 0.9370      | -0.60379    | 45.27         | 0.8                            | 0.0                              | 9.8                                      | -1                                 | 0                                           | -9                                                  | 37                                        | -10                                         | -449                                                |
| Hc(C17)  | 0.9403      | -0.60757    | 43.70         | 0.8                            | 0.0                              | -0.7                                     | -1                                 | 0                                           | 0                                                   | 56                                        | -23                                         | -24                                                 |

**Supplementary Table 2.5a** Integrated properties of cocaine in MC3.

| Atom     | $N(\Omega)$ | $E(\Omega)$ | $v(\Omega)$ | $\Delta_{\text{def}}E(\Omega)$ | $-\Delta_{\text{BSSE}}E(\Omega)$ | $\Delta_{\text{b}}^{\text{CP}}E(\Omega)$ | $\Delta_{\text{def}}N(\Omega) \cdot 10^3$ | $-\Delta_{\text{BSSE}}N(\Omega) \cdot 10^3$ | $\Delta_{\text{b}}^{\text{CP}}N(\Omega) \cdot 10^3$ | $\Delta_{\text{def}}V(\Omega) \cdot 10^3$ | $-\Delta_{\text{BSSE}}V(\Omega) \cdot 10^3$ | $\Delta_{\text{b}}^{\text{CP}}V(\Omega) \cdot 10^3$ |
|----------|-------------|-------------|-------------|--------------------------------|----------------------------------|------------------------------------------|-------------------------------------------|---------------------------------------------|-----------------------------------------------------|-------------------------------------------|---------------------------------------------|-----------------------------------------------------|
| C1       | 5.7232      | -37.91359   | 46.94       | -0.2                           | 1.4                              | 7.8                                      | 0                                         | 0                                           | -1                                                  | 12                                        | -21                                         | 24                                                  |
| H1       | 0.9606      | -0.62205    | 45.57       | 0.2                            | 0.0                              | 5.1                                      | 0                                         | 0                                           | -4                                                  | -25                                       | -37                                         | -225                                                |
| C2       | 5.9344      | -38.06655   | 48.15       | 2.7                            | 1.4                              | 10.0                                     | 0                                         | 0                                           | 0                                                   | 47                                        | 22                                          | -44                                                 |
| H2       | 0.9492      | -0.61545    | 44.20       | 0.6                            | 0.0                              | -0.4                                     | 0                                         | 0                                           | 1                                                   | 37                                        | -85                                         | 69                                                  |
| C1'      | 4.3859      | -37.03066   | 34.16       | 2.5                            | 1.7                              | 10.3                                     | -2                                        | 1                                           | -1                                                  | 27                                        | 79                                          | -13                                                 |
| O1'      | 9.2068      | -76.00291   | 123.16      | -12.9                          | 4.5                              | 6.6                                      | 1                                         | 0                                           | -3                                                  | -108                                      | -69                                         | -185                                                |
| O2'      | 9.0948      | -75.97425   | 101.39      | 4.5                            | 3.4                              | 17.4                                     | -1                                        | 0                                           | 2                                                   | 213                                       | 8                                           | 54                                                  |
| C3'      | 5.5426      | -37.76361   | 62.98       | -5.3                           | 1.6                              | -0.9                                     | 2                                         | 0                                           | 2                                                   | 85                                        | 34                                          | 43                                                  |
| Ht(C3')  | 0.9425      | -0.60990    | 45.38       | 0.8                            | 0.0                              | 0.8                                      | 0                                         | 0                                           | 0                                                   | -17                                       | -18                                         | 21                                                  |
| Hg+(C3') | 0.9454      | -0.60940    | 45.49       | -0.4                           | 0.0                              | 5.3                                      | 0                                         | 0                                           | -5                                                  | 28                                        | 17                                          | -344                                                |
| Hg-(C3') | 0.9491      | -0.61091    | 46.25       | 1.6                            | 0.0                              | 0.7                                      | -1                                        | 0                                           | 1                                                   | -211                                      | 0                                           | 34                                                  |
| C3       | 5.5022      | -37.76036   | 40.75       | -2.0                           | 0.4                              | -0.5                                     | 5                                         | 0                                           | 3                                                   | 260                                       | -5                                          | 9                                                   |
| H3       | 0.9524      | -0.62887    | 39.62       | 2.3                            | 0.0                              | -1.9                                     | 0                                         | 0                                           | 3                                                   | 482                                       | 13                                          | 110                                                 |
| O3       | 9.0886      | -75.94502   | 95.50       | -21.0                          | 3.8                              | -0.4                                     | 3                                         | 0                                           | -1                                                  | -274                                      | -40                                         | -74                                                 |
| O1''     | 9.2041      | -76.01057   | 132.71      | 10.3                           | 4.7                              | 22.0                                     | -1                                        | 1                                           | 3                                                   | 764                                       | 57                                          | 2369                                                |
| C1''     | 4.4768      | -37.08138   | 39.99       | 20.1                           | -0.2                             | 36.9                                     | -10                                       | 0                                           | -7                                                  | -168                                      | -30                                         | -140                                                |
| C1r      | 5.9901      | -38.09741   | 72.07       | 1.3                            | -6.5                             | -1.3                                     | 2                                         | 1                                           | -2                                                  | 116                                       | 158                                         | -258                                                |
| C2r      | 5.9874      | -38.07493   | 79.81       | 3.9                            | -12.5                            | -14.5                                    | 0                                         | -1                                          | 4                                                   | 152                                       | 90                                          | -1108                                               |
| H2r      | 0.9525      | -0.61149    | 46.37       | 0.0                            | 0.5                              | -10.9                                    | 0                                         | 1                                           | 9                                                   | 136                                       | 104                                         | 1644                                                |
| C3r      | 5.9922      | -38.05850   | 85.69       | 3.6                            | -10.0                            | -11.9                                    | 1                                         | -1                                          | 9                                                   | 106                                       | 220                                         | 2375                                                |
| H3r      | 0.9751      | -0.61813    | 52.05       | 1.3                            | 0.5                              | -5.7                                     | 0                                         | 1                                           | 6                                                   | 38                                        | 163                                         | 4042                                                |
| C4r      | 5.9908      | -38.05881   | 82.96       | -2.5                           | -4.5                             | -3.7                                     | 1                                         | 0                                           | 3                                                   | 126                                       | 129                                         | 264                                                 |
| H4r      | 0.9661      | -0.61501    | 47.84       | -0.3                           | 0.2                              | 2.3                                      | 0                                         | 0                                           | -2                                                  | 18                                        | 45                                          | -87                                                 |
| C5r      | 5.9887      | -38.05456   | 83.38       | -3.0                           | -0.2                             | 0.6                                      | 1                                         | 0                                           | -1                                                  | 117                                       | 27                                          | -49                                                 |
| H5r      | 0.9712      | -0.61692    | 48.05       | -0.8                           | 0.1                              | 7.3                                      | 1                                         | 0                                           | -8                                                  | -28                                       | 28                                          | -537                                                |
| C6r      | 5.9899      | -38.06807   | 80.95       | -3.8                           | -0.4                             | 0.0                                      | 1                                         | 0                                           | -1                                                  | -42                                       | 95                                          | -84                                                 |
| H6r      | 0.9662      | -0.61993    | 46.83       | -1.4                           | 0.1                              | 8.2                                      | 1                                         | 0                                           | -9                                                  | -15                                       | 14                                          | -576                                                |
| C4       | 5.9341      | -38.05286   | 54.99       | -0.4                           | 0.9                              | 7.2                                      | 0                                         | 0                                           | 0                                                   | 22                                        | -56                                         | -26                                                 |
| H4a      | 0.9755      | -0.62121    | 45.30       | 0.8                            | 0.0                              | 3.2                                      | -1                                        | 0                                           | -2                                                  | -166                                      | 22                                          | -130                                                |
| H4e      | 0.9564      | -0.61327    | 45.24       | 0.3                            | 0.0                              | -4.9                                     | 0                                         | 0                                           | 4                                                   | 92                                        | -11                                         | 224                                                 |
| C5       | 5.7214      | -37.91132   | 48.05       | -0.5                           | 1.7                              | 9.1                                      | -1                                        | 0                                           | -1                                                  | -35                                       | 29                                          | 19                                                  |
| H5       | 0.9612      | -0.62174    | 45.66       | 0.1                            | 0.0                              | 3.7                                      | 0                                         | 0                                           | -3                                                  | -3                                        | 10                                          | -182                                                |
| C6       | 5.9371      | -38.01639   | 58.16       | -0.7                           | 1.8                              | 7.2                                      | 1                                         | 0                                           | 0                                                   | 38                                        | 26                                          | -16                                                 |
| H6a      | 0.9753      | -0.62123    | 46.46       | 0.0                            | 0.1                              | -6.8                                     | 0                                         | 0                                           | 6                                                   | -12                                       | 79                                          | 355                                                 |
| H6e      | 0.9874      | -0.62813    | 47.37       | 0.6                            | 0.0                              | 4.5                                      | 0                                         | 0                                           | -3                                                  | -33                                       | 38                                          | -268                                                |
| C7       | 5.9356      | -38.01506   | 58.03       | -0.6                           | 1.5                              | 6.5                                      | 1                                         | 0                                           | 0                                                   | 95                                        | -71                                         | -1                                                  |
| H7e      | 0.9832      | -0.62658    | 47.19       | -0.1                           | 0.0                              | 4.4                                      | 0                                         | 0                                           | -4                                                  | -30                                       | -4                                          | -279                                                |
| H7a      | 0.9799      | -0.62301    | 46.43       | 1.4                            | 0.0                              | -2.5                                     | -1                                        | 0                                           | 4                                                   | 78                                        | 40                                          | 240                                                 |
| N8       | 8.0330      | -55.35540   | 59.71       | 0.3                            | 2.4                              | 12.0                                     | -1                                        | 0                                           | 0                                                   | 13                                        | -4                                          | 19                                                  |
| H8       | 0.4850      | -0.40130    | 17.14       | 0.1                            | 0.1                              | 0.8                                      | 0                                         | 0                                           | 0                                                   | 75                                        | -20                                         | -15                                                 |
| C8       | 5.6646      | -37.85620   | 64.04       | -3.8                           | 1.6                              | 2.2                                      | 2                                         | 0                                           | 1                                                   | 115                                       | -37                                         | 74                                                  |
| Ha-(C8)  | 0.9417      | -0.60538    | 45.63       | 0.7                            | 0.0                              | 4.3                                      | 0                                         | 0                                           | -3                                                  | -28                                       | -37                                         | -191                                                |
| Ha+(C8)  | 0.9425      | -0.60554    | 45.82       | 0.3                            | 0.0                              | 4.6                                      | 0                                         | 0                                           | -4                                                  | 13                                        | 36                                          | -268                                                |
| Hc(C8)   | 0.9537      | -0.61373    | 44.15       | 0.3                            | 0.0                              | 1.4                                      | 0                                         | 0                                           | -1                                                  | -95                                       | 29                                          | -70                                                 |

**Supplementary Table 2.5b** Integrated properties of morphine in MC3.

| Atom     | $N(\Omega)$ | $E(\Omega)$ | $\nu(\Omega)$ | $\Delta_{\text{def}}E(\Omega)$ | $-\Delta_{\text{BSSE}}E(\Omega)$ | $\Delta_{\text{b}}^{\text{CP}}E(\Omega)$ | $\Delta_{\text{def}}N(\Omega)10^3$ | $-\Delta_{\text{BSSE}}N(\Omega) \cdot 10^3$ | $\Delta_{\text{b}}^{\text{CP}}N(\Omega) \cdot 10^3$ | $\Delta_{\text{def}}V(\Omega) \cdot 10^3$ | $-\Delta_{\text{BSSE}}V(\Omega) \cdot 10^3$ | $\Delta_{\text{b}}^{\text{CP}}V(\Omega) \cdot 10^3$ |
|----------|-------------|-------------|---------------|--------------------------------|----------------------------------|------------------------------------------|------------------------------------|---------------------------------------------|-----------------------------------------------------|-------------------------------------------|---------------------------------------------|-----------------------------------------------------|
| C1       | 5.9942      | -38.03371   | 84.03         | 1.3                            | -1.9                             | -3.1                                     | 0                                  | 0                                           | 1                                                   | -2                                        | 114                                         | 35                                                  |
| H1       | 0.9766      | -0.61721    | 48.96         | -0.4                           | 0.1                              | -0.6                                     | 0                                  | 0                                           | 0                                                   | 19                                        | -15                                         | 65                                                  |
| C2       | 5.9782      | -38.04031   | 83.84         | 0.0                            | -7.9                             | -10.1                                    | -1                                 | -1                                          | 1                                                   | 116                                       | -52                                         | 1108                                                |
| H2       | 0.9461      | -0.60523    | 47.53         | 0.9                            | 0.2                              | -2.6                                     | 0                                  | 1                                           | 3                                                   | -15                                       | 69                                          | 1194                                                |
| C3       | 5.4242      | -37.73089   | 60.16         | -15.5                          | -3.7                             | -30.7                                    | 5                                  | 0                                           | 8                                                   | 57                                        | 45                                          | 901                                                 |
| O3       | 9.1415      | -75.88338   | 123.31        | 16.6                           | 0.5                              | -3.9                                     | -4                                 | 1                                           | 11                                                  | -14                                       | -228                                        | 1486                                                |
| H(O3)    | 0.3847      | -0.34560    | 20.45         | -0.9                           | 1.1                              | -0.1                                     | 1                                  | 0                                           | 0                                                   | -41                                       | 19                                          | 396                                                 |
| C4       | 5.5620      | -37.89138   | 60.77         | -2.1                           | 0.3                              | -3.2                                     | -2                                 | -1                                          | 1                                                   | -89                                       | -43                                         | 495                                                 |
| O        | 9.0232      | -75.77617   | 108.32        | -9.1                           | 4.4                              | -9.8                                     | 0                                  | 0                                           | 1                                                   | -140                                      | -54                                         | 1997                                                |
| C5       | 5.5690      | -37.89355   | 41.55         | -2.0                           | -0.7                             | -3.8                                     | -2                                 | 0                                           | 0                                                   | -200                                      | -7                                          | 27                                                  |
| H5       | 0.9804      | -0.64789    | 43.23         | -2.3                           | 0.0                              | -13.8                                    | 0                                  | 0                                           | 10                                                  | -282                                      | 27                                          | 2114                                                |
| C6       | 5.4380      | -37.70175   | 45.50         | -7.6                           | 0.3                              | -11.5                                    | 5                                  | 0                                           | 2                                                   | 235                                       | -31                                         | 59                                                  |
| H6       | 0.9897      | -0.63024    | 49.06         | 0.8                            | 0.0                              | 7.3                                      | -1                                 | 0                                           | -6                                                  | 138                                       | -11                                         | -384                                                |
| O6       | 9.1042      | -75.80626   | 124.95        | 11.8                           | 0.7                              | 4.0                                      | -4                                 | 0                                           | 6                                                   | 43                                        | -41                                         | 2309                                                |
| H(O6)    | 0.4041      | -0.35801    | 21.14         | -1.2                           | -0.2                             | -1.3                                     | 0                                  | 0                                           | 0                                                   | -48                                       | 7                                           | 10                                                  |
| C7       | 6.0105      | -38.06971   | 79.91         | -0.2                           | -4.2                             | -7.4                                     | 0                                  | 0                                           | 2                                                   | 85                                        | -12                                         | 93                                                  |
| H7       | 0.9269      | -0.59725    | 45.01         | -0.2                           | 0.1                              | 1.0                                      | 1                                  | 0                                           | -1                                                  | 125                                       | 8                                           | -82                                                 |
| C8       | 6.0265      | -38.04750   | 83.73         | -2.0                           | -1.0                             | -4.2                                     | 0                                  | 0                                           | -1                                                  | -47                                       | -4                                          | -39                                                 |
| H8       | 0.9609      | -0.60967    | 48.05         | -0.4                           | 0.1                              | 4.1                                      | 0                                  | 0                                           | -4                                                  | -18                                       | -17                                         | -289                                                |
| C9       | 5.7593      | -37.89415   | 48.41         | 1.3                            | 0.6                              | 2.5                                      | -1                                 | 0                                           | -1                                                  | 56                                        | 8                                           | 12                                                  |
| H9       | 0.9711      | -0.62749    | 46.34         | -0.2                           | 0.0                              | 4.8                                      | 0                                  | 0                                           | -4                                                  | -78                                       | 74                                          | -317                                                |
| C10      | 5.9275      | -37.99755   | 58.52         | 0.9                            | 1.0                              | 0.1                                      | 0                                  | 0                                           | 0                                                   | 164                                       | 121                                         | 27                                                  |
| H10e     | 0.9957      | -0.63081    | 46.47         | -0.5                           | 0.0                              | 3.6                                      | 0                                  | 0                                           | -4                                                  | -22                                       | 7                                           | -195                                                |
| H10a     | 0.9660      | -0.61551    | 47.22         | -0.4                           | 0.0                              | -0.4                                     | 0                                  | 0                                           | 0                                                   | 6                                         | -30                                         | -2                                                  |
| C11      | 6.0208      | -38.10496   | 69.74         | 4.9                            | -0.1                             | 4.5                                      | -1                                 | 0                                           | -2                                                  | 187                                       | -9                                          | -114                                                |
| C12      | 6.0419      | -38.26446   | 59.31         | 5.8                            | 0.9                              | 5.7                                      | 1                                  | 0                                           | -1                                                  | 249                                       | 17                                          | -27                                                 |
| C13      | 5.9589      | -38.12404   | 41.17         | 4.9                            | 1.2                              | 6.1                                      | 0                                  | 0                                           | -1                                                  | 88                                        | 18                                          | -11                                                 |
| C14      | 5.9471      | -38.05348   | 49.17         | -2.8                           | 1.1                              | -3.3                                     | 0                                  | 0                                           | 0                                                   | -47                                       | -24                                         | 33                                                  |
| H14      | 1.0261      | -0.66347    | 42.42         | -1.6                           | 0.0                              | 3.4                                      | 1                                  | 0                                           | -4                                                  | -59                                       | -7                                          | -209                                                |
| C15      | 5.9254      | -38.02407   | 55.82         | 1.0                            | 0.2                              | 0.6                                      | 0                                  | 0                                           | 0                                                   | 126                                       | -39                                         | 8                                                   |
| H15e     | 0.9596      | -0.61408    | 45.08         | 1.2                            | 0.0                              | 0.2                                      | 0                                  | 0                                           | 0                                                   | 71                                        | 31                                          | -5                                                  |
| H15a     | 1.0055      | -0.63303    | 48.79         | -0.5                           | 0.1                              | 3.7                                      | 1                                  | 0                                           | -4                                                  | 113                                       | 7                                           | -282                                                |
| C16      | 5.7292      | -37.90267   | 53.89         | 0.3                            | 1.8                              | 1.9                                      | -1                                 | 1                                           | 0                                                   | -50                                       | 86                                          | -1                                                  |
| H16e     | 0.9595      | -0.61852    | 45.87         | 0.0                            | 0.0                              | 5.8                                      | 0                                  | 0                                           | -5                                                  | -5                                        | -12                                         | -301                                                |
| H16a     | 0.9475      | -0.61735    | 42.03         | 0.6                            | 0.0                              | -2.0                                     | 0                                  | 0                                           | 2                                                   | 222                                       | -19                                         | 64                                                  |
| N17      | 7.9546      | -55.22607   | 58.75         | -1.4                           | 1.7                              | -2.3                                     | -1                                 | 0                                           | 1                                                   | -103                                      | -11                                         | 43                                                  |
| H17      | 0.5676      | -0.45243    | 27.37         | 0.1                            | 0.0                              | 4.1                                      | 0                                  | 0                                           | -3                                                  | 4                                         | -14                                         | -166                                                |
| C17      | 5.6732      | -37.86460   | 62.89         | -2.1                           | 1.5                              | -2.8                                     | 2                                  | 0                                           | 1                                                   | 185                                       | -75                                         | 83                                                  |
| Ha+(C17) | 0.9439      | -0.60644    | 45.57         | 0.6                            | 0.0                              | 4.0                                      | 0                                  | 0                                           | -3                                                  | 19                                        | 1                                           | -202                                                |
| Ha-(C17) | 0.9409      | -0.60545    | 45.37         | 0.5                            | 0.0                              | 5.5                                      | 0                                  | 0                                           | -5                                                  | 6                                         | 5                                           | -286                                                |
| Hc(C17)  | 0.9417      | -0.60814    | 43.75         | 0.1                            | 0.0                              | -2.0                                     | 0                                  | 0                                           | 2                                                   | -2                                        | 67                                          | 64                                                  |

**Supplementary Table 2.6a** Integrated properties of cocaine in MC4.

| Atom     | $N(\Omega)$ | $E(\Omega)$ | $v(\Omega)$ | $\Delta_{\text{def}}E(\Omega)$ | $-\Delta_{\text{BSSE}}E(\Omega)$ | $\Delta_{\text{b}}^{\text{CP}}E(\Omega)$ | $\Delta_{\text{def}}N(\Omega) \cdot 10^3$ | $-\Delta_{\text{BSSE}}N(\Omega) \cdot 10^3$ | $\Delta_{\text{b}}^{\text{CP}}N(\Omega) \cdot 10^3$ | $\Delta_{\text{def}}V(\Omega) \cdot 10^3$ | $-\Delta_{\text{BSSE}}V(\Omega) \cdot 10^3$ | $\Delta_{\text{b}}^{\text{CP}}V(\Omega) \cdot 10^3$ |
|----------|-------------|-------------|-------------|--------------------------------|----------------------------------|------------------------------------------|-------------------------------------------|---------------------------------------------|-----------------------------------------------------|-------------------------------------------|---------------------------------------------|-----------------------------------------------------|
| C1       | 5.7230      | -37.91346   | 46.79       | 2.9                            | 1.4                              | 3.8                                      | -1                                        | 0                                           | 0                                                   | -161                                      | 18                                          | 3                                                   |
| H1       | 0.9641      | -0.62372    | 45.71       | 1.9                            | 0.0                              | -1.2                                     | -2                                        | 0                                           | 1                                                   | -163                                      | -10                                         | 25                                                  |
| C2       | 5.9330      | -38.06945   | 47.87       | -4.4                           | -1.2                             | 8.0                                      | -1                                        | 0                                           | -1                                                  | -223                                      | -67                                         | 35                                                  |
| H2       | 0.9451      | -0.61490    | 43.72       | -4.9                           | -0.1                             | 6.0                                      | 2                                         | 0                                           | -6                                                  | -187                                      | 47                                          | -326                                                |
| C1'      | 4.3881      | -37.03196   | 34.10       | 5.2                            | -9.2                             | 10.7                                     | -2                                        | 0                                           | 2                                                   | 165                                       | -37                                         | -93                                                 |
| O1'      | 9.2335      | -76.00363   | 122.18      | 49.0                           | -1.1                             | -43.2                                    | -1                                        | 0                                           | 25                                                  | 2900                                      | -61                                         | -4161                                               |
| O2'      | 9.0927      | -75.98281   | 100.41      | -24.8                          | -0.2                             | 20.3                                     | 6                                         | 0                                           | -8                                                  | -360                                      | 49                                          | -413                                                |
| C3'      | 5.5326      | -37.75788   | 62.75       | 8.1                            | 0.2                              | 5.9                                      | -5                                        | 0                                           | -1                                                  | 35                                        | -57                                         | -50                                                 |
| Ht(C3')  | 0.9371      | -0.60768    | 45.05       | -3.6                           | 0.0                              | 10.2                                     | 3                                         | 0                                           | -9                                                  | 156                                       | 74                                          | -578                                                |
| Hg+(C3') | 0.9571      | -0.61425    | 46.21       | 0.2                            | 0.0                              | -7.5                                     | 0                                         | 0                                           | 7                                                   | -30                                       | 22                                          | 434                                                 |
| Hg-(C3') | 0.9572      | -0.61384    | 47.05       | 0.0                            | 0.0                              | -6.9                                     | 1                                         | 0                                           | 6                                                   | 221                                       | 21                                          | 403                                                 |
| C3       | 5.4906      | -37.75478   | 40.37       | 9.0                            | 0.5                              | 4.5                                      | -4                                        | 0                                           | 0                                                   | -126                                      | -13                                         | 29                                                  |
| H3       | 0.9493      | -0.62815    | 39.33       | -6.5                           | -0.1                             | 6.6                                      | 6                                         | 0                                           | -5                                                  | 483                                       | 37                                          | -224                                                |
| O3       | 9.0862      | -75.93626   | 95.98       | 16.2                           | 2.2                              | 4.0                                      | -4                                        | 0                                           | 3                                                   | -17                                       | 1                                           | 124                                                 |
| O1''     | 9.1989      | -76.01813   | 128.65      | -13.3                          | 2.1                              | 13.4                                     | 2                                         | 0                                           | -4                                                  | -630                                      | 9                                           | -243                                                |
| C1''     | 4.4985      | -37.09832   | 40.37       | -9.0                           | -0.5                             | 2.0                                      | 4                                         | 0                                           | 2                                                   | 38                                        | -30                                         | 31                                                  |
| C1r      | 5.9904      | -38.09499   | 72.04       | -0.6                           | 1.1                              | 4.7                                      | -1                                        | 0                                           | 1                                                   | -5                                        | -39                                         | 36                                                  |
| C2r      | 5.9827      | -38.06744   | 80.61       | -1.1                           | 1.2                              | 5.0                                      | 0                                         | 0                                           | -1                                                  | 63                                        | -58                                         | -89                                                 |
| H2r      | 0.9399      | -0.60628    | 44.38       | -0.7                           | 0.0                              | 3.4                                      | 1                                         | 0                                           | -3                                                  | 58                                        | 56                                          | -221                                                |
| C3r      | 5.9817      | -38.05184   | 82.99       | -1.5                           | 1.3                              | 5.8                                      | 0                                         | 0                                           | -2                                                  | 140                                       | -60                                         | -68                                                 |
| H3r      | 0.9629      | -0.61385    | 47.44       | -0.2                           | 0.0                              | 5.7                                      | 0                                         | 0                                           | -5                                                  | -13                                       | -3                                          | -350                                                |
| C4r      | 5.9859      | -38.05532   | 82.45       | -1.1                           | 1.2                              | 5.3                                      | 0                                         | 0                                           | -1                                                  | 67                                        | -34                                         | -35                                                 |
| H4r      | 0.9636      | -0.61432    | 47.55       | 0.0                            | 0.0                              | 4.1                                      | 0                                         | 0                                           | -4                                                  | -20                                       | -43                                         | -249                                                |
| C5r      | 5.9892      | -38.05316   | 83.41       | -0.5                           | 0.8                              | 4.0                                      | 0                                         | 0                                           | 1                                                   | 102                                       | -68                                         | 101                                                 |
| H5r      | 0.9796      | -0.62014    | 48.70       | 0.5                            | 0.0                              | -1.7                                     | 0                                         | 0                                           | 2                                                   | -53                                       | -23                                         | 162                                                 |
| C6r      | 5.9926      | -38.06643   | 81.25       | 0.0                            | 0.8                              | 3.5                                      | 0                                         | 0                                           | 3                                                   | 97                                        | -5                                          | 162                                                 |
| H6r      | 0.9790      | -0.62474    | 47.83       | 2.8                            | 0.0                              | -7.1                                     | -2                                        | 0                                           | 7                                                   | 26                                        | -61                                         | 458                                                 |
| C4       | 5.9357      | -38.05599   | 55.12       | -4.4                           | -1.0                             | 4.4                                      | 1                                         | 1                                           | 0                                                   | -16                                       | 113                                         | -31                                                 |
| H4a      | 0.9849      | -0.62439    | 46.97       | -0.7                           | -0.2                             | -4.3                                     | 2                                         | 0                                           | 4                                                   | 566                                       | -87                                         | 906                                                 |
| H4e      | 0.9447      | -0.60906    | 43.92       | 4.2                            | 0.0                              | 2.0                                      | -6                                        | 0                                           | -2                                                  | -927                                      | 11                                          | -81                                                 |
| C5       | 5.7245      | -37.91540   | 48.11       | -9.6                           | 0.7                              | 7.2                                      | 2                                         | 1                                           | -1                                                  | -29                                       | 36                                          | 61                                                  |
| H5       | 0.9662      | -0.62400    | 46.11       | -0.4                           | -0.1                             | -1.7                                     | 0                                         | 0                                           | 2                                                   | 78                                        | -11                                         | 239                                                 |
| C6       | 5.9371      | -38.01748   | 58.13       | -1.1                           | 1.1                              | 4.3                                      | 0                                         | 0                                           | 0                                                   | -66                                       | 53                                          | 25                                                  |
| H6a      | 0.9653      | -0.61732    | 45.75       | 0.7                            | -0.2                             | 3.0                                      | -1                                        | 0                                           | -3                                                  | -138                                      | 24                                          | -172                                                |
| H6e      | 0.9890      | -0.62898    | 47.39       | 0.1                            | 0.0                              | 2.2                                      | 0                                         | 0                                           | -2                                                  | -138                                      | 31                                          | -137                                                |
| C7       | 5.9349      | -38.01628   | 57.83       | -2.6                           | 0.6                              | 5.2                                      | 1                                         | -1                                          | 0                                                   | -102                                      | -79                                         | 8                                                   |
| H7e      | 0.9843      | -0.62726    | 47.13       | -1.5                           | 0.0                              | 4.1                                      | 1                                         | 0                                           | -4                                                  | -106                                      | -35                                         | -235                                                |
| H7a      | 0.9730      | -0.62054    | 45.88       | 0.8                            | -0.1                             | 3.3                                      | -1                                        | 0                                           | -3                                                  | 22                                        | -25                                         | -195                                                |
| N8       | 8.0222      | -55.34807   | 59.04       | 20.9                           | -0.4                             | 10.9                                     | -9                                        | -1                                          | -2                                                  | -151                                      | -93                                         | -396                                                |
| H8       | 0.4945      | -0.40789    | 16.72       | -15.0                          | -0.8                             | -0.7                                     | 12                                        | 0                                           | -2                                                  | 2045                                      | 0                                           | -2418                                               |
| C8       | 5.6582      | -37.85736   | 63.58       | -11.6                          | -0.6                             | 11.4                                     | 2                                         | -1                                          | -4                                                  | -6                                        | -12                                         | -296                                                |
| Ha-(C8)  | 0.9470      | -0.60865    | 47.25       | -2.2                           | -0.3                             | -1.8                                     | 0                                         | 0                                           | 1                                                   | -134                                      | 24                                          | 1473                                                |
| Ha+(C8)  | 0.9492      | -0.60863    | 46.31       | 1.0                            | -0.2                             | -4.3                                     | -2                                        | 0                                           | 4                                                   | -191                                      | 29                                          | 428                                                 |
| Hc(C8)   | 0.9531      | -0.61400    | 43.82       | 1.0                            | -0.2                             | 0.0                                      | -2                                        | 0                                           | 0                                                   | -398                                      | -54                                         | -3                                                  |

**Supplementary Table 2.6b** Integrated properties of morphine in MC4.

| Atom     | $N(\Omega)$ | $E(\Omega)$ | $\nu(\Omega)$ | $\Delta_{\text{def}}E(\Omega)$ | $-\Delta_{\text{BSSE}}E(\Omega)$ | $\Delta_{\text{b}}^{\text{CP}}E(\Omega)$ | $\Delta_{\text{def}}N(\Omega) \cdot 10^3$ | $-\Delta_{\text{BSSE}}N(\Omega) \cdot 10^3$ | $\Delta_{\text{b}}^{\text{CP}}N(\Omega) \cdot 10^3$ | $\Delta_{\text{def}}V(\Omega) \cdot 10^3$ | $-\Delta_{\text{BSSE}}V(\Omega) \cdot 10^3$ | $\Delta_{\text{b}}^{\text{CP}}V(\Omega) \cdot 10^3$ |
|----------|-------------|-------------|---------------|--------------------------------|----------------------------------|------------------------------------------|-------------------------------------------|---------------------------------------------|-----------------------------------------------------|-------------------------------------------|---------------------------------------------|-----------------------------------------------------|
| C1       | 5.9893      | -38.03367   | 83.62         | -6.9                           | 0.3                              | 3.5                                      | 0                                         | 0                                           | -5                                                  | -24                                       | 87                                          | -329                                                |
| H1       | 0.9689      | -0.61438    | 48.39         | -0.8                           | 0.0                              | 7.7                                      | 0                                         | 0                                           | -8                                                  | 31                                        | 39                                          | -573                                                |
| C2       | 5.9830      | -38.03987   | 82.94         | -3.3                           | -4.7                             | -0.9                                     | -2                                        | 0                                           | 6                                                   | -139                                      | 2                                           | 417                                                 |
| H2       | 0.9698      | -0.61489    | 49.06         | 0.1                            | 0.0                              | -28.0                                    | 0                                         | 0                                           | 26                                                  | 8                                         | 10                                          | 2754                                                |
| C3       | 5.4499      | -37.74684   | 60.30         | -26.2                          | -14.0                            | -31.7                                    | 18                                        | -2                                          | 21                                                  | 591                                       | -45                                         | 583                                                 |
| O3       | 9.1743      | -75.88281   | 122.61        | 83.1                           | -4.2                             | -82.5                                    | -11                                       | 1                                           | 52                                                  | 502                                       | -235                                        | 361                                                 |
| H(O3)    | 0.3648      | -0.33285    | 17.68         | 1.8                            | 0.7                              | 31.0                                     | 1                                         | 0                                           | -20                                                 | 158                                       | 75                                          | -2622                                               |
| C4       | 5.5463      | -37.87855   | 59.94         | 19.4                           | -2.4                             | 13.4                                     | -12                                       | 0                                           | -7                                                  | -186                                      | 23                                          | -284                                                |
| O        | 9.0212      | -75.77324   | 106.69        | -3.6                           | 4.0                              | -2.2                                     | -3                                        | 0                                           | 3                                                   | 106                                       | -69                                         | 142                                                 |
| C5       | 5.5817      | -37.89876   | 41.94         | -10.5                          | 0.8                              | -8.0                                     | 6                                         | 0                                           | 4                                                   | 131                                       | 17                                          | 60                                                  |
| H5       | 0.9718      | -0.64395    | 41.20         | -0.4                           | 0.0                              | -3.0                                     | -1                                        | 0                                           | 3                                                   | -271                                      | -65                                         | 151                                                 |
| C6       | 5.4319      | -37.69675   | 45.43         | 0.0                            | 1.4                              | 0.1                                      | 0                                         | 0                                           | 1                                                   | 94                                        | 40                                          | 58                                                  |
| H6       | 0.9917      | -0.63147    | 49.03         | -1.2                           | 0.0                              | 5.4                                      | 1                                         | 0                                           | -5                                                  | 16                                        | 39                                          | -340                                                |
| O6       | 9.1009      | -75.80912   | 122.64        | -8.9                           | 2.7                              | 2.5                                      | 0                                         | 0                                           | -1                                                  | 47                                        | -28                                         | -26                                                 |
| H(O6)    | 0.4069      | -0.35990    | 21.33         | -0.6                           | -0.1                             | -5.7                                     | -1                                        | 0                                           | 4                                                   | -134                                      | 14                                          | 278                                                 |
| C7       | 6.0091      | -38.06957   | 79.66         | -8.0                           | -0.1                             | 1.0                                      | 1                                         | 0                                           | 0                                                   | 26                                        | -81                                         | -31                                                 |
| H7       | 0.9217      | -0.59524    | 44.66         | -0.1                           | 0.0                              | 6.4                                      | 0                                         | 0                                           | -6                                                  | 80                                        | -23                                         | -354                                                |
| C8       | 6.0262      | -38.04816   | 83.63         | -7.4                           | 0.7                              | 0.8                                      | 0                                         | 0                                           | -1                                                  | -87                                       | 29                                          | -121                                                |
| H8       | 0.9569      | -0.60814    | 47.79         | -0.3                           | 0.0                              | 8.4                                      | 0                                         | 0                                           | -8                                                  | -40                                       | 18                                          | -581                                                |
| C9       | 5.7579      | -37.89442   | 48.29         | -1.6                           | 1.2                              | 2.4                                      | -2                                        | 0                                           | 0                                                   | 6                                         | -121                                        | 66                                                  |
| H9       | 0.9670      | -0.62592    | 46.09         | -1.0                           | 0.0                              | 9.9                                      | 0                                         | 0                                           | -9                                                  | -42                                       | 38                                          | -572                                                |
| C10      | 5.9281      | -37.99940   | 58.44         | -4.9                           | 1.2                              | -1.0                                     | 1                                         | 0                                           | 1                                                   | 88                                        | 7                                           | 129                                                 |
| H10e     | 0.9917      | -0.62927    | 46.20         | -1.5                           | 0.0                              | 9.1                                      | 1                                         | 0                                           | -8                                                  | -16                                       | -60                                         | -417                                                |
| H10a     | 0.9606      | -0.61346    | 46.78         | -1.2                           | 0.0                              | 6.1                                      | 0                                         | 0                                           | -5                                                  | -17                                       | -54                                         | -384                                                |
| C11      | 6.0164      | -38.10542   | 69.32         | -5.3                           | 1.2                              | 7.4                                      | 0                                         | 0                                           | -7                                                  | 6                                         | -25                                         | -337                                                |
| C12      | 6.0384      | -38.26248   | 59.37         | 4.8                            | 1.6                              | 4.6                                      | 1                                         | 0                                           | -5                                                  | 409                                       | 17                                          | -130                                                |
| C13      | 5.9572      | -38.12369   | 41.08         | 4.2                            | 1.2                              | 1.8                                      | -1                                        | -1                                          | -1                                                  | 76                                        | -61                                         | -11                                                 |
| C14      | 5.9467      | -38.05358   | 49.19         | -5.8                           | 1.2                              | 1.1                                      | 0                                         | 0                                           | 0                                                   | -89                                       | 44                                          | 39                                                  |
| H14      | 1.0247      | -0.66322    | 42.28         | -2.8                           | 0.0                              | 6.9                                      | 1                                         | 0                                           | -6                                                  | -83                                       | -12                                         | -321                                                |
| C15      | 5.9258      | -38.02340   | 55.80         | 0.7                            | 0.6                              | 1.1                                      | 0                                         | 0                                           | 0                                                   | 92                                        | -9                                          | -3                                                  |
| H15e     | 0.9637      | -0.61589    | 45.33         | 0.3                            | 0.0                              | -4.9                                     | 0                                         | 0                                           | 4                                                   | 219                                       | -2                                          | 141                                                 |
| H15a     | 1.0034      | -0.63256    | 48.59         | -2.3                           | 0.1                              | 7.2                                      | 1                                         | 0                                           | -7                                                  | 14                                        | 53                                          | -423                                                |
| C16      | 5.7269      | -37.90115   | 53.81         | 1.9                            | 1.3                              | 2.7                                      | -2                                        | 0                                           | -1                                                  | -82                                       | 58                                          | -20                                                 |
| H16e     | 0.9571      | -0.61765    | 45.73         | -0.3                           | 0.0                              | 8.4                                      | 0                                         | 0                                           | -7                                                  | -22                                       | 6                                           | -443                                                |
| H16a     | 0.9499      | -0.61847    | 42.20         | 0.5                            | 0.0                              | -5.5                                     | 0                                         | 0                                           | 4                                                   | 293                                       | -17                                         | 171                                                 |
| N17      | 7.9565      | -55.22760   | 58.93         | -6.9                           | 2.1                              | -1.6                                     | 0                                         | 0                                           | 2                                                   | -53                                       | 79                                          | 82                                                  |
| H17      | 0.5656      | -0.45128    | 27.25         | 0.6                            | 0.0                              | 6.5                                      | 0                                         | 0                                           | -5                                                  | 24                                        | -43                                         | -283                                                |
| C17      | 5.6752      | -37.86601   | 62.89         | -6.3                           | 1.4                              | -1.6                                     | 3                                         | 0                                           | 1                                                   | 245                                       | -124                                        | 63                                                  |
| Ha+(C17) | 0.9408      | -0.60518    | 45.39         | 0.7                            | 0.0                              | 6.6                                      | -1                                        | 0                                           | -6                                                  | -26                                       | 28                                          | -373                                                |
| Ha-(C17) | 0.9387      | -0.60457    | 45.30         | 0.4                            | 0.0                              | 7.4                                      | 0                                         | 0                                           | -7                                                  | -7                                        | -6                                          | -334                                                |
| Hc(C17)  | 0.9420      | -0.60841    | 43.70         | 0.2                            | 0.0                              | -2.9                                     | 0                                         | 0                                           | 2                                                   | -53                                       | 25                                          | 105                                                 |

**Supplementary Table 2.7a** Integrated properties of ecgonine methyl ester in ME1.

| Atom     | $N(\Omega)$ | $E(\Omega)$ | $\nu(\Omega)$ | $\Delta_{\text{def}}E(\Omega)$ | $-\Delta_{\text{BSSE}}E(\Omega)$ | $\Delta_{\text{b}}^{\text{CP}}E(\Omega)$ | $\Delta_{\text{def}}N(\Omega) \cdot 10^3$ | $-\Delta_{\text{BSSE}}N(\Omega) \cdot 10^3$ | $\Delta_{\text{b}}^{\text{CP}}N(\Omega) \cdot 10^3$ | $\Delta_{\text{def}}V(\Omega) \cdot 10^3$ | $-\Delta_{\text{BSSE}}V(\Omega) \cdot 10^3$ | $\Delta_{\text{b}}^{\text{CP}}V(\Omega) \cdot 10^3$ |
|----------|-------------|-------------|---------------|--------------------------------|----------------------------------|------------------------------------------|-------------------------------------------|---------------------------------------------|-----------------------------------------------------|-------------------------------------------|---------------------------------------------|-----------------------------------------------------|
| C1       | 5.7228      | -37.91353   | 46.97         | -2.3                           | 0.2                              | 3.3                                      | 0                                         | 0                                           | 0                                                   | 3                                         | -15                                         | 26                                                  |
| H1       | 0.9633      | -0.62327    | 45.76         | -0.9                           | 0.0                              | 1.4                                      | 1                                         | 0                                           | -1                                                  | 32                                        | -29                                         | -25                                                 |
| C2       | 5.9491      | -38.07862   | 48.57         | 3.9                            | -0.6                             | 3.3                                      | -3                                        | 0                                           | -2                                                  | -34                                       | -35                                         | -134                                                |
| H2       | 0.9668      | -0.62239    | 45.40         | 1.1                            | 0.0                              | -4.8                                     | -1                                        | 0                                           | 4                                                   | -57                                       | -19                                         | 270                                                 |
| C1'      | 4.3856      | -37.03055   | 33.86         | -6.8                           | -0.4                             | 3.2                                      | 3                                         | 0                                           | 0                                                   | 65                                        | -28                                         | -16                                                 |
| O1'      | 9.2078      | -76.00281   | 123.24        | -13.3                          | 1.8                              | 10.5                                     | 1                                         | 0                                           | -2                                                  | -355                                      | -5                                          | -94                                                 |
| O2'      | 9.0985      | -75.97140   | 100.85        | 16.6                           | 1.1                              | -2.6                                     | -5                                        | 0                                           | 5                                                   | 232                                       | 3                                           | 245                                                 |
| C3'      | 5.5401      | -37.76214   | 62.63         | -1.5                           | 0.0                              | 4.8                                      | -1                                        | 0                                           | -1                                                  | -103                                      | -49                                         | 18                                                  |
| Ht(C3')  | 0.9493      | -0.61284    | 45.78         | 0.0                            | 0.0                              | -6.2                                     | 0                                         | 0                                           | 5                                                   | 81                                        | -35                                         | 330                                                 |
| Hg+(C3') | 0.9456      | -0.60980    | 45.33         | -2.3                           | 0.0                              | 6.1                                      | 2                                         | 0                                           | -5                                                  | -22                                       | 76                                          | -335                                                |
| Hg-(C3') | 0.9461      | -0.60959    | 45.64         | -0.1                           | 0.0                              | -2.3                                     | 0                                         | 0                                           | 2                                                   | 35                                        | -3                                          | 148                                                 |
| C3       | 5.4257      | -37.69087   | 41.31         | 11.3                           | -2.2                             | 11.6                                     | -6                                        | 0                                           | -5                                                  | -95                                       | 76                                          | -352                                                |
| H3       | 1.0018      | -0.64644    | 45.79         | -1.9                           | 0.0                              | 2.1                                      | 1                                         | 0                                           | -1                                                  | 25                                        | 35                                          | 323                                                 |
| O3       | 9.1400      | -75.83533   | 122.19        | 7.7                            | -1.2                             | -42.0                                    | 3                                         | -1                                          | 29                                                  | 619                                       | -245                                        | 2691                                                |
| H(O3)    | 0.3768      | -0.34186    | 16.09         | 5.5                            | -0.6                             | 31.5                                     | -1                                        | 1                                           | -24                                                 | 22                                        | 117                                         | -5022                                               |
| C4       | 5.9276      | -38.04992   | 54.62         | -2.2                           | -0.7                             | 2.7                                      | 1                                         | 0                                           | 0                                                   | 0                                         | -42                                         | -69                                                 |
| H4a      | 0.9716      | -0.61973    | 45.02         | -0.1                           | -0.1                             | -3.4                                     | 0                                         | 0                                           | 3                                                   | -116                                      | 57                                          | 204                                                 |
| H4e      | 0.9763      | -0.61991    | 47.64         | -2.3                           | 0.0                              | -7.2                                     | 2                                         | 0                                           | 7                                                   | 140                                       | 24                                          | 523                                                 |
| C5       | 5.7222      | -37.91142   | 48.09         | 1.2                            | 0.0                              | 3.6                                      | 0                                         | 0                                           | 1                                                   | 115                                       | -12                                         | 155                                                 |
| H5       | 0.9647      | -0.62342    | 45.91         | 0.1                            | 0.1                              | -0.5                                     | 0                                         | 0                                           | 1                                                   | 50                                        | -35                                         | 98                                                  |
| C6       | 5.9365      | -38.01609   | 58.21         | -0.4                           | -0.1                             | 2.2                                      | 0                                         | 0                                           | 0                                                   | -2                                        | 153                                         | -67                                                 |
| H6a      | 0.9808      | -0.62326    | 46.90         | -0.4                           | 0.1                              | -1.3                                     | 1                                         | 0                                           | 1                                                   | -27                                       | 29                                          | 171                                                 |
| H6e      | 0.9888      | -0.62876    | 47.45         | 0.2                            | 0.0                              | 1.0                                      | 0                                         | 0                                           | -1                                                  | -4                                        | -22                                         | -67                                                 |
| C7       | 5.9354      | -38.01438   | 58.17         | -2.8                           | -0.2                             | 4.3                                      | 0                                         | 0                                           | 0                                                   | -15                                       | -9                                          | 73                                                  |
| H7e      | 0.9845      | -0.62709    | 47.34         | -0.5                           | 0.0                              | 2.3                                      | 0                                         | 0                                           | -2                                                  | -28                                       | 26                                          | -86                                                 |
| H7a      | 0.9863      | -0.62575    | 46.93         | -0.2                           | 0.1                              | -4.8                                     | 0                                         | 0                                           | 4                                                   | 22                                        | 2                                           | 275                                                 |
| N8       | 8.0340      | -55.35756   | 59.60         | -5.9                           | 1.0                              | 6.4                                      | 0                                         | 0                                           | 0                                                   | 13                                        | -63                                         | -4                                                  |
| H8       | 0.4840      | -0.40072    | 17.05         | -0.8                           | 0.0                              | -0.8                                     | 0                                         | 0                                           | 0                                                   | 15                                        | 3                                           | -47                                                 |
| C8       | 5.6636      | -37.85499   | 64.02         | -2.7                           | -0.2                             | 3.0                                      | 1                                         | 0                                           | 1                                                   | 61                                        | -75                                         | 37                                                  |
| Ha-(C8)  | 0.9432      | -0.60608    | 45.69         | -0.1                           | 0.0                              | 1.7                                      | 0                                         | 0                                           | -1                                                  | -13                                       | -12                                         | -110                                                |
| Ha+(C8)  | 0.9428      | -0.60576    | 45.79         | -0.2                           | 0.0                              | 2.5                                      | 0                                         | 0                                           | -2                                                  | -25                                       | 25                                          | -167                                                |
| Hc(C8)   | 0.9549      | -0.61393    | 44.34         | 1.0                            | 0.1                              | 1.2                                      | 0                                         | 0                                           | -1                                                  | 90                                        | 27                                          | -53                                                 |

**Supplementary Table 2.7b** Integrated properties of morphine in ME1.

| Atom     | $N(\Omega)$ | $E(\Omega)$ | $\nu(\Omega)$ | $\Delta_{\text{def}}E(\Omega)$ | $-\Delta_{\text{BSSE}}E(\Omega)$ | $\Delta_{\text{b}}^{\text{CP}}E(\Omega)$ | $\Delta_{\text{def}}N(\Omega) \cdot 10^3$ | $-\Delta_{\text{BSSE}}N(\Omega) \cdot 10^3$ | $\Delta_{\text{b}}^{\text{CP}}N(\Omega) \cdot 10^3$ | $\Delta_{\text{def}}V(\Omega) \cdot 10^3$ | $-\Delta_{\text{BSSE}}V(\Omega) \cdot 10^3$ | $\Delta_{\text{b}}^{\text{CP}}V(\Omega) \cdot 10^3$ |
|----------|-------------|-------------|---------------|--------------------------------|----------------------------------|------------------------------------------|-------------------------------------------|---------------------------------------------|-----------------------------------------------------|-------------------------------------------|---------------------------------------------|-----------------------------------------------------|
| C1       | 5.9839      | -38.03136   | 83.35         | -7.7                           | 0.2                              | 9.5                                      | 1                                         | 0                                           | -9                                                  | 23                                        | -16                                         | -520                                                |
| H1       | 0.9633      | -0.61208    | 48.01         | -1.6                           | 0.0                              | 14.9                                     | 1                                         | 0                                           | -15                                                 | 54                                        | 8                                           | -1032                                               |
| C2       | 5.9916      | -38.03912   | 82.89         | -10.6                          | -1.3                             | 14.8                                     | -3                                        | 0                                           | -6                                                  | -320                                      | 5                                           | -298                                                |
| H2       | 0.9691      | -0.61379    | 47.81         | 1.3                            | 0.1                              | 6.1                                      | -1                                        | 0                                           | -6                                                  | -78                                       | -40                                         | -359                                                |
| C3       | 5.4632      | -37.74691   | 60.63         | -59.1                          | -3.9                             | -31.6                                    | 29                                        | -1                                          | 26                                                  | 671                                       | -6                                          | 598                                                 |
| O3       | 9.1498      | -75.86780   | 118.36        | 104.7                          | 2.2                              | -64.6                                    | -20                                       | 1                                           | 41                                                  | 372                                       | 62                                          | -3536                                               |
| H(O3)    | 0.3851      | -0.34557    | 20.38         | -4.9                           | 1.7                              | 16.2                                     | 3                                         | 0                                           | -10                                                 | 169                                       | 3                                           | -563                                                |
| C4       | 5.5206      | -37.86296   | 59.15         | 1.2                            | -3.6                             | -3.0                                     | -6                                        | 0                                           | 5                                                   | -129                                      | -72                                         | -15                                                 |
| O        | 9.0090      | -75.78027   | 106.60        | 21.6                           | 1.8                              | -17.6                                    | -10                                       | 1                                           | 22                                                  | 28                                        | -18                                         | 2708                                                |
| C5       | 5.5674      | -37.88759   | 41.72         | -9.5                           | -0.6                             | -9.0                                     | 3                                         | 0                                           | 8                                                   | 97                                        | -82                                         | 184                                                 |
| H5       | 0.9938      | -0.65219    | 42.58         | -1.1                           | -0.1                             | 1.6                                      | 0                                         | 0                                           | -1                                                  | -36                                       | -12                                         | -63                                                 |
| C6       | 5.4198      | -37.69262   | 44.64         | -19.9                          | 0.1                              | -2.0                                     | 6                                         | 0                                           | 5                                                   | 109                                       | 26                                          | 137                                                 |
| H6       | 0.9687      | -0.62516    | 47.18         | 4.0                            | -0.1                             | 1.8                                      | -3                                        | 0                                           | -2                                                  | -3                                        | 1                                           | -120                                                |
| O6       | 9.0978      | -75.80231   | 122.39        | 16.3                           | 0.2                              | -5.3                                     | -9                                        | 0                                           | 10                                                  | -304                                      | 68                                          | 748                                                 |
| H(O6)    | 0.4173      | -0.36327    | 22.66         | -4.6                           | -0.1                             | -0.7                                     | 3                                         | 0                                           | 1                                                   | 346                                       | 4                                           | 20                                                  |
| C7       | 6.0343      | -38.07502   | 81.12         | -1.1                           | -0.5                             | 5.1                                      | 3                                         | 0                                           | 2                                                   | 210                                       | -37                                         | 50                                                  |
| H7       | 0.9420      | -0.60244    | 46.30         | -6.1                           | 0.0                              | 6.4                                      | 6                                         | 0                                           | -6                                                  | 384                                       | 24                                          | -382                                                |
| C8       | 6.0257      | -38.04678   | 83.46         | -3.6                           | -0.4                             | 5.8                                      | -3                                        | 0                                           | -5                                                  | -318                                      | -106                                        | -261                                                |
| H8       | 0.9553      | -0.60753    | 47.70         | -0.5                           | 0.0                              | 11.7                                     | 0                                         | 0                                           | -11                                                 | -68                                       | -42                                         | -799                                                |
| C9       | 5.7584      | -37.89275   | 48.49         | 2.0                            | 0.0                              | 4.4                                      | -2                                        | 0                                           | 0                                                   | 111                                       | -78                                         | 177                                                 |
| H9       | 0.9664      | -0.62553    | 46.02         | -0.3                           | -0.1                             | 10.7                                     | 0                                         | 0                                           | -9                                                  | 41                                        | 18                                          | -693                                                |
| C10      | 5.9278      | -37.99964   | 58.35         | -4.7                           | 0.2                              | -0.4                                     | 1                                         | 0                                           | 1                                                   | 135                                       | 7                                           | 98                                                  |
| H10e     | 0.9897      | -0.62847    | 46.12         | -1.8                           | 0.0                              | 11.8                                     | 0                                         | 0                                           | -10                                                 | -35                                       | -30                                         | -536                                                |
| H10a     | 0.9599      | -0.61309    | 46.74         | -1.1                           | 0.0                              | 8.5                                      | 0                                         | 0                                           | -7                                                  | -82                                       | 61                                          | -557                                                |
| C11      | 6.0153      | -38.10618   | 69.07         | -4.6                           | 0.1                              | 8.7                                      | 0                                         | 0                                           | -7                                                  | 52                                        | 71                                          | -405                                                |
| C12      | 6.0416      | -38.26381   | 59.44         | -1.6                           | 0.7                              | 8.6                                      | 0                                         | 0                                           | -6                                                  | 227                                       | 21                                          | -201                                                |
| C13      | 5.9579      | -38.12326   | 41.21         | 5.1                            | 1.0                              | 5.7                                      | 0                                         | 1                                           | 0                                                   | 160                                       | 115                                         | 42                                                  |
| C14      | 5.9473      | -38.05350   | 49.27         | -5.6                           | 0.2                              | 3.2                                      | 1                                         | 0                                           | -1                                                  | 128                                       | -44                                         | -17                                                 |
| H14      | 1.0228      | -0.66293    | 42.03         | -2.9                           | 0.0                              | 7.0                                      | 0                                         | 0                                           | -6                                                  | -248                                      | -11                                         | -284                                                |
| C15      | 5.9257      | -38.02286   | 55.83         | 3.4                            | -0.5                             | 2.6                                      | -1                                        | 0                                           | 1                                                   | 101                                       | -67                                         | 53                                                  |
| H15e     | 0.9597      | -0.61424    | 45.12         | 0.6                            | -0.1                             | -7.0                                     | 0                                         | 0                                           | 6                                                   | 267                                       | -49                                         | 274                                                 |
| H15a     | 1.0032      | -0.63244    | 48.57         | -0.7                           | 0.0                              | 3.9                                      | 0                                         | 0                                           | -4                                                  | 67                                        | 32                                          | -250                                                |
| C16      | 5.7288      | -37.90119   | 53.91         | 0.7                            | 0.8                              | 5.0                                      | -1                                        | 0                                           | -2                                                  | 18                                        | -6                                          | 14                                                  |
| H16e     | 0.9564      | -0.61733    | 45.64         | -0.1                           | 0.0                              | 8.4                                      | 0                                         | 0                                           | -7                                                  | -6                                        | -12                                         | -470                                                |
| H16a     | 0.9484      | -0.61792    | 42.07         | 0.4                            | 0.0                              | -2.2                                     | 0                                         | 0                                           | 1                                                   | 145                                       | 19                                          | 50                                                  |
| N17      | 7.9557      | -55.22566   | 58.79         | -1.9                           | 0.9                              | 0.5                                      | -1                                        | 0                                           | 2                                                   | -72                                       | 77                                          | 6                                                   |
| H17      | 0.5661      | -0.45164    | 27.26         | 0.3                            | 0.0                              | 5.2                                      | 0                                         | 0                                           | -4                                                  | -29                                       | 10                                          | -265                                                |
| C17      | 5.6753      | -37.86521   | 63.04         | -6.5                           | 1.0                              | -0.3                                     | 3                                         | 0                                           | 2                                                   | 10                                        | 142                                         | 89                                                  |
| Ha+(C17) | 0.9405      | -0.60501    | 45.36         | 0.6                            | 0.0                              | 7.6                                      | -1                                        | 0                                           | -7                                                  | 71                                        | -31                                         | -446                                                |
| Ha-(C17) | 0.9381      | -0.60431    | 45.21         | 0.7                            | 0.0                              | 7.5                                      | -1                                        | 0                                           | -7                                                  | -13                                       | -44                                         | -383                                                |
| Hc(C17)  | 0.9409      | -0.60785    | 43.65         | 0.6                            | 0.0                              | -0.6                                     | 0                                         | 0                                           | 0                                                   | 79                                        | -55                                         | -5                                                  |

**Supplementary Table 2.8a** Integrated properties of ecgonine methyl ester in ME2.

| Atom     | $N(\Omega)$ | $E(\Omega)$ | $\nu(\Omega)$ | $\Delta_{\text{def}}E(\Omega)$ | $-\Delta_{\text{BSSE}}E(\Omega)$ | $\Delta_{\text{b}}^{\text{CP}}E(\Omega)$ | $\Delta_{\text{def}}N(\Omega) \cdot 10^3$ | $-\Delta_{\text{BSSE}}N(\Omega) \cdot 10^3$ | $\Delta_{\text{b}}^{\text{CP}}N(\Omega) \cdot 10^3$ | $\Delta_{\text{def}}V(\Omega) \cdot 10^3$ | $-\Delta_{\text{BSSE}}V(\Omega) \cdot 10^3$ | $\Delta_{\text{b}}^{\text{CP}}V(\Omega) \cdot 10^3$ |
|----------|-------------|-------------|---------------|--------------------------------|----------------------------------|------------------------------------------|-------------------------------------------|---------------------------------------------|-----------------------------------------------------|-------------------------------------------|---------------------------------------------|-----------------------------------------------------|
| C1       | 5.7237      | -37.91470   | 46.88         | -1.9                           | -0.1                             | 3.8                                      | 0                                         | -1                                          | 0                                                   | -44                                       | -52                                         | 23                                                  |
| H1       | 0.9622      | -0.62283    | 45.63         | -0.9                           | 0.0                              | 2.4                                      | 1                                         | 0                                           | -2                                                  | 18                                        | -14                                         | -129                                                |
| C2       | 5.9387      | -38.07265   | 48.15         | -5.7                           | 0.1                              | 3.8                                      | 3                                         | 0                                           | 0                                                   | 104                                       | 23                                          | -36                                                 |
| H2       | 0.9560      | -0.61850    | 44.62         | -6.5                           | 0.0                              | -3.4                                     | 6                                         | 0                                           | 3                                                   | 280                                       | -16                                         | 150                                                 |
| C1'      | 4.3837      | -37.02913   | 33.80         | -14.5                          | -0.1                             | 2.9                                      | 5                                         | 0                                           | 1                                                   | 245                                       | -14                                         | -46                                                 |
| O1'      | 9.2090      | -76.00081   | 123.39        | -13.1                          | 1.9                              | 9.5                                      | 0                                         | 0                                           | -1                                                  | -62                                       | 14                                          | -64                                                 |
| O2'      | 9.0944      | -75.97570   | 100.32        | 13.4                           | 0.9                              | 3.6                                      | -1                                        | 0                                           | 3                                                   | 649                                       | -31                                         | 96                                                  |
| C3'      | 5.5368      | -37.76021   | 62.53         | -2.5                           | -0.4                             | 7.1                                      | -1                                        | 0                                           | -1                                                  | -44                                       | -65                                         | -39                                                 |
| Ht(C3')  | 0.9465      | -0.61170    | 45.61         | -0.9                           | 0.0                              | -3.9                                     | 1                                         | 0                                           | 3                                                   | 45                                        | -13                                         | 228                                                 |
| Hg+(C3') | 0.9472      | -0.61031    | 45.53         | -2.1                           | 0.1                              | 7.2                                      | 2                                         | 0                                           | -6                                                  | 98                                        | -9                                          | -398                                                |
| Hg-(C3') | 0.9512      | -0.61174    | 45.94         | 1.2                            | 0.0                              | -8.1                                     | -1                                        | 0                                           | 7                                                   | -81                                       | 16                                          | 458                                                 |
| C3       | 5.4299      | -37.69244   | 41.53         | 17.0                           | -1.4                             | 12.8                                     | -5                                        | -1                                          | -5                                                  | 74                                        | 14                                          | -142                                                |
| H3       | 1.0100      | -0.65015    | 46.01         | -2.2                           | 0.0                              | -5.8                                     | 2                                         | 0                                           | 6                                                   | 161                                       | 47                                          | 560                                                 |
| O3       | 9.1536      | -75.83650   | 123.66        | 23.3                           | -2.7                             | -58.6                                    | 4                                         | 0                                           | 39                                                  | 953                                       | -188                                        | 3143                                                |
| H(O3)    | 0.3708      | -0.33730    | 14.87         | 10.9                           | -0.5                             | 35.8                                     | -4                                        | 1                                           | -25                                                 | -208                                      | 119                                         | -5985                                               |
| C4       | 5.9358      | -38.05315   | 55.23         | 5.1                            | -0.5                             | 4.7                                      | -7                                        | 0                                           | -1                                                  | -353                                      | 72                                          | -57                                                 |
| H4a      | 0.9722      | -0.61982    | 45.12         | 2.4                            | -0.1                             | -3.9                                     | -3                                        | 0                                           | 4                                                   | -182                                      | -5                                          | 253                                                 |
| H4e      | 0.9853      | -0.62327    | 48.35         | 4.7                            | 0.0                              | -4.7                                     | -5                                        | 0                                           | 4                                                   | -447                                      | -32                                         | 396                                                 |
| C5       | 5.7223      | -37.91139   | 48.16         | -6.8                           | 0.0                              | 4.1                                      | 1                                         | 0                                           | 0                                                   | 73                                        | 42                                          | 33                                                  |
| H5       | 0.9635      | -0.62286    | 45.80         | 0.1                            | 0.0                              | 1.4                                      | 0                                         | 0                                           | -1                                                  | -27                                       | 20                                          | -81                                                 |
| C6       | 5.9360      | -38.01589   | 58.12         | -5.0                           | 0.2                              | 5.1                                      | 0                                         | 0                                           | 0                                                   | 76                                        | -28                                         | -13                                                 |
| H6a      | 0.9854      | -0.62530    | 47.15         | -0.6                           | 0.1                              | -4.2                                     | 0                                         | 0                                           | 4                                                   | 50                                        | 2                                           | 300                                                 |
| H6e      | 0.9860      | -0.62765    | 47.32         | -0.1                           | 0.0                              | 4.2                                      | 0                                         | 0                                           | -4                                                  | 26                                        | -22                                         | -253                                                |
| C7       | 5.9350      | -38.01490   | 58.09         | -4.8                           | 0.0                              | 5.0                                      | 0                                         | 0                                           | 0                                                   | -24                                       | -16                                         | -4                                                  |
| H7e      | 0.9824      | -0.62634    | 47.14         | -0.9                           | -0.1                             | 4.6                                      | 0                                         | 0                                           | -4                                                  | -23                                       | 6                                           | -299                                                |
| H7a      | 0.9840      | -0.62464    | 46.83         | -1.6                           | 0.1                              | -3.2                                     | 2                                         | 0                                           | 3                                                   | 157                                       | 62                                          | 209                                                 |
| N8       | 8.0334      | -55.35579   | 59.65         | 0.7                            | 0.8                              | 7.8                                      | -2                                        | 0                                           | 0                                                   | 43                                        | -76                                         | -12                                                 |
| H8       | 0.4849      | -0.40112    | 17.10         | -3.1                           | 0.0                              | -2.4                                     | 2                                         | 0                                           | 1                                                   | 267                                       | -22                                         | 23                                                  |
| C8       | 5.6634      | -37.85515   | 64.03         | -4.5                           | -0.3                             | 3.1                                      | 2                                         | 0                                           | 1                                                   | 95                                        | -65                                         | 45                                                  |
| Ha-(C8)  | 0.9427      | -0.60588    | 45.63         | 0.5                            | 0.0                              | 2.2                                      | -1                                        | 0                                           | -2                                                  | -55                                       | -67                                         | -109                                                |
| Ha+(C8)  | 0.9427      | -0.60573    | 45.83         | -0.4                           | 0.0                              | 2.8                                      | 0                                         | 0                                           | -3                                                  | 2                                         | 37                                          | -168                                                |
| Hc(C8)   | 0.9538      | -0.61364    | 44.28         | 0.4                            | 0.0                              | 2.5                                      | 0                                         | 0                                           | -2                                                  | 21                                        | -28                                         | -105                                                |



**Supplementary Table 2.8b** Integrated properties of morphine in ME2.

| Atom     | $N(\Omega)$ | $E(\Omega)$ | $\nu(\Omega)$ | $\Delta_{\text{def}}E(\Omega)$ | $-\Delta_{\text{BSSE}}E(\Omega)$ | $\Delta_{\text{b}}^{\text{CP}}E(\Omega)$ | $\Delta_{\text{def}}N(\Omega) \cdot 10^3$ | $-\Delta_{\text{BSSE}}N(\Omega) \cdot 10^3$ | $\Delta_{\text{b}}^{\text{CP}}N(\Omega) \cdot 10^3$ | $\Delta_{\text{def}}V(\Omega) \cdot 10^3$ | $-\Delta_{\text{BSSE}}V(\Omega) \cdot 10^3$ | $\Delta_{\text{b}}^{\text{CP}}V(\Omega) \cdot 10^3$ |
|----------|-------------|-------------|---------------|--------------------------------|----------------------------------|------------------------------------------|-------------------------------------------|---------------------------------------------|-----------------------------------------------------|-------------------------------------------|---------------------------------------------|-----------------------------------------------------|
| C1       | 5.9894      | -38.03287   | 83.52         | -5.8                           | 0.4                              | 4.5                                      | 0                                         | 0                                           | -4                                                  | -20                                       | -78                                         | -277                                                |
| H1       | 0.9673      | -0.61371    | 48.23         | -0.3                           | 0.0                              | 8.9                                      | 0                                         | 0                                           | -9                                                  | 13                                        | -41                                         | -631                                                |
| C2       | 5.9757      | -38.03671   | 82.55         | -5.3                           | 0.7                              | 4.0                                      | 0                                         | 0                                           | -3                                                  | 61                                        | -9                                          | -157                                                |
| H2       | 0.9350      | -0.60094    | 45.72         | 0.2                            | 0.0                              | 8.4                                      | 0                                         | 0                                           | -8                                                  | -71                                       | 6                                           | -494                                                |
| C3       | 5.4071      | -37.71643   | 59.03         | 1.7                            | -0.1                             | 5.5                                      | -3                                        | 0                                           | -2                                                  | -58                                       | -9                                          | -72                                                 |
| O3       | 9.1299      | -75.88329   | 121.74        | -12.8                          | 1.2                              | 8.2                                      | 1                                         | 0                                           | -4                                                  | -96                                       | -20                                         | -209                                                |
| H(O3)    | 0.3859      | -0.34702    | 20.17         | 0.3                            | 0.1                              | -4.3                                     | -1                                        | 0                                           | 3                                                   | -37                                       | 5                                           | 124                                                 |
| C4       | 5.5833      | -37.89997   | 60.92         | -18.7                          | 0.0                              | -7.1                                     | 12                                        | 0                                           | 7                                                   | 352                                       | 20                                          | 158                                                 |
| O        | 9.0239      | -75.77005   | 106.80        | 3.9                            | 1.3                              | 0.5                                      | -1                                        | 0                                           | 3                                                   | 182                                       | -58                                         | 147                                                 |
| C5       | 5.5567      | -37.88466   | 41.15         | 8.0                            | 0.1                              | 11.7                                     | -12                                       | 0                                           | -2                                                  | -508                                      | -61                                         | -21                                                 |
| H5       | 0.9731      | -0.64388    | 41.43         | -0.2                           | 0.0                              | -3.1                                     | 0                                         | 0                                           | 2                                                   | 24                                        | -54                                         | 74                                                  |
| C6       | 5.4783      | -37.72751   | 45.97         | -56.8                          | -1.5                             | -20.7                                    | 31                                        | -1                                          | 18                                                  | 434                                       | -65                                         | 361                                                 |
| H6       | 0.9825      | -0.62877    | 48.47         | -0.9                           | 0.0                              | 12.2                                     | -2                                        | 0                                           | -12                                                 | -176                                      | -11                                         | -651                                                |
| O6       | 9.1226      | -75.79876   | 117.76        | 97.7                           | -2.5                             | -71.9                                    | -22                                       | 1                                           | 41                                                  | 564                                       | -282                                        | -5154                                               |
| H(O6)    | 0.3963      | -0.35297    | 20.82         | -3.0                           | 1.0                              | 13.9                                     | 2                                         | 0                                           | -9                                                  | 244                                       | 18                                          | -634                                                |
| C7       | 6.0145      | -38.06460   | 80.41         | 11.7                           | -3.4                             | -2.4                                     | -3                                        | -1                                          | 9                                                   | 209                                       | -25                                         | 493                                                 |
| H7       | 0.9367      | -0.60214    | 46.09         | 1.7                            | -0.4                             | -13.1                                    | 0                                         | 1                                           | 9                                                   | 297                                       | 40                                          | 804                                                 |
| C8       | 6.0164      | -38.04213   | 82.95         | -1.6                           | -1.5                             | 13.0                                     | 0                                         | 0                                           | -11                                                 | -66                                       | -24                                         | -768                                                |
| H8       | 0.9579      | -0.60884    | 47.87         | -1.2                           | 0.0                              | 7.4                                      | 1                                         | 0                                           | -8                                                  | 13                                        | -69                                         | -473                                                |
| C9       | 5.7579      | -37.89146   | 48.41         | 2.7                            | 0.5                              | 6.6                                      | -1                                        | 0                                           | -2                                                  | 63                                        | -27                                         | 29                                                  |
| H9       | 0.9707      | -0.62728    | 46.31         | 0.5                            | 0.0                              | 4.9                                      | -1                                        | 0                                           | -4                                                  | -51                                       | -19                                         | -286                                                |
| C10      | 5.9264      | -37.99792   | 58.34         | -3.7                           | 0.9                              | 2.0                                      | 0                                         | 0                                           | 0                                                   | -49                                       | 128                                         | 47                                                  |
| H10e     | 0.9913      | -0.62931    | 46.11         | -1.7                           | 0.0                              | 9.2                                      | 0                                         | 0                                           | -8                                                  | -137                                      | 57                                          | -501                                                |
| H10a     | 0.9652      | -0.61512    | 47.15         | 0.5                            | 0.0                              | 0.1                                      | 0                                         | 0                                           | 0                                                   | -56                                       | 7                                           | -54                                                 |
| C11      | 6.0199      | -38.10581   | 69.50         | -3.4                           | 0.0                              | 5.7                                      | -1                                        | 0                                           | -3                                                  | -121                                      | 42                                          | -110                                                |
| C12      | 6.0408      | -38.26531   | 59.08         | -0.2                           | 0.6                              | 3.2                                      | -1                                        | 0                                           | 0                                                   | -7                                        | 7                                           | 9                                                   |
| C13      | 5.9602      | -38.12569   | 41.11         | -5.1                           | 0.3                              | 6.7                                      | 0                                         | 1                                           | 0                                                   | -1                                        | 13                                          | 18                                                  |
| C14      | 5.9478      | -38.05258   | 49.30         | -0.5                           | -0.9                             | 0.6                                      | 1                                         | -1                                          | 1                                                   | 158                                       | -100                                        | 47                                                  |
| H14      | 1.0251      | -0.66289    | 42.43         | -0.4                           | 0.0                              | 5.3                                      | -1                                        | 0                                           | -4                                                  | -70                                       | 23                                          | -217                                                |
| C15      | 5.9265      | -38.02404   | 55.89         | -0.7                           | 0.0                              | 1.3                                      | 0                                         | 0                                           | 1                                                   | 33                                        | 96                                          | 44                                                  |
| H15e     | 0.9570      | -0.61327    | 44.84         | -0.8                           | 0.0                              | 3.1                                      | 1                                         | 0                                           | -3                                                  | 74                                        | 18                                          | -227                                                |
| H15a     | 1.0097      | -0.63481    | 48.97         | 1.2                            | 0.0                              | -2.1                                     | -1                                        | 0                                           | 2                                                   | -72                                       | 5                                           | 79                                                  |
| C16      | 5.7293      | -37.90288   | 53.89         | -2.4                           | 0.6                              | 3.1                                      | 0                                         | 0                                           | 0                                                   | 21                                        | -52                                         | 67                                                  |
| H16e     | 0.9574      | -0.61777    | 45.70         | -0.6                           | -0.1                             | 8.5                                      | 0                                         | 0                                           | -7                                                  | 12                                        | 15                                          | -502                                                |
| H16a     | 0.9419      | -0.61522    | 41.61         | -0.5                           | 0.0                              | 4.1                                      | 0                                         | 0                                           | -4                                                  | 112                                       | -18                                         | -233                                                |
| N17      | 7.9539      | -55.22291   | 58.78         | 2.8                            | 0.4                              | 2.6                                      | -2                                        | 0                                           | 1                                                   | 28                                        | -68                                         | 7                                                   |
| H17      | 0.5693      | -0.45349    | 27.51         | 1.0                            | 0.0                              | 0.4                                      | 0                                         | 0                                           | -1                                                  | 21                                        | -12                                         | -55                                                 |
| C17      | 5.6754      | -37.86578   | 62.88         | -6.2                           | 0.3                              | 0.1                                      | 3                                         | 0                                           | 2                                                   | 139                                       | -50                                         | 90                                                  |
| Ha+(C17) | 0.9429      | -0.60600    | 45.51         | 0.7                            | 0.0                              | 4.5                                      | -1                                        | 0                                           | -4                                                  | 1                                         | -9                                          | -242                                                |
| Ha-(C17) | 0.9390      | -0.60478    | 45.27         | 0.0                            | 0.0                              | 7.2                                      | 0                                         | 0                                           | -6                                                  | 26                                        | -9                                          | -394                                                |
| Hc(C17)  | 0.9371      | -0.60633    | 43.38         | -0.1                           | 0.0                              | 2.8                                      | 0                                         | 0                                           | -3                                                  | -75                                       | 37                                          | -183                                                |

**Supplementary Table 2.9a** Integrated properties of ecgonine methyl ester in ME3.

| Atom     | $N(\Omega)$ | $E(\Omega)$ | $\nu(\Omega)$ | $\Delta_{\text{def}}E(\Omega)$ | $-\Delta_{\text{BSSE}}E(\Omega)$ | $\Delta_{\text{b}}^{\text{CP}}E(\Omega)$ | $\Delta_{\text{def}}N(\Omega) \cdot 10^3$ | $-\Delta_{\text{BSSE}}N(\Omega) \cdot 10^3$ | $\Delta_{\text{b}}^{\text{CP}}N(\Omega) \cdot 10^3$ | $\Delta_{\text{def}}V(\Omega) \cdot 10^3$ | $-\Delta_{\text{BSSE}}V(\Omega) \cdot 10^3$ | $\Delta_{\text{b}}^{\text{CP}}V(\Omega) \cdot 10^3$ |
|----------|-------------|-------------|---------------|--------------------------------|----------------------------------|------------------------------------------|-------------------------------------------|---------------------------------------------|-----------------------------------------------------|-------------------------------------------|---------------------------------------------|-----------------------------------------------------|
| C1       | 5.7203      | -37.91056   | 46.87         | 5.8                            | 1.4                              | 1.9                                      | -1                                        | -1                                          | -1                                                  | 53                                        | -60                                         | -79                                                 |
| H1       | 0.9641      | -0.62351    | 45.77         | 1.5                            | 0.0                              | -1.6                                     | -1                                        | 0                                           | 2                                                   | -100                                      | 54                                          | 34                                                  |
| C2       | 5.9508      | -38.08031   | 48.62         | -5.6                           | -0.1                             | 7.9                                      | -2                                        | 0                                           | -1                                                  | -242                                      | 20                                          | 73                                                  |
| H2       | 0.9593      | -0.62033    | 44.59         | -4.5                           | -0.2                             | 6.5                                      | 1                                         | 0                                           | -6                                                  | -328                                      | 22                                          | -313                                                |
| C1'      | 4.3814      | -37.02633   | 33.65         | 5.7                            | -7.8                             | 9.1                                      | -4                                        | 0                                           | 2                                                   | -137                                      | -4                                          | -43                                                 |
| O1'      | 9.2354      | -76.00147   | 122.08        | 51.9                           | -1.0                             | -48.5                                    | -1                                        | 0                                           | 28                                                  | 2881                                      | -166                                        | -4326                                               |
| O2'      | 9.0975      | -75.98040   | 99.79         | -25.3                          | 1.9                              | 15.5                                     | 6                                         | 0                                           | -7                                                  | 59                                        | -79                                         | -566                                                |
| C3'      | 5.5378      | -37.75972   | 62.62         | 6.2                            | 1.7                              | 1.7                                      | -4                                        | 0                                           | 0                                                   | -13                                       | 18                                          | -165                                                |
| Ht(C3')  | 0.9350      | -0.60689    | 44.93         | -3.0                           | 0.1                              | 12.4                                     | 2                                         | 0                                           | -11                                                 | 155                                       | 6                                           | -647                                                |
| Hg+(C3') | 0.9555      | -0.61363    | 46.14         | -0.1                           | 0.0                              | -6.2                                     | 1                                         | 0                                           | 5                                                   | 137                                       | -2                                          | 390                                                 |
| Hg-(C3') | 0.9502      | -0.61103    | 46.00         | 0.0                            | 0.0                              | -6.2                                     | 1                                         | 0                                           | 6                                                   | 232                                       | 65                                          | 241                                                 |
| C3       | 5.4383      | -37.69836   | 41.81         | -3.7                           | 1.1                              | 3.9                                      | 1                                         | 0                                           | 0                                                   | 34                                        | -8                                          | 100                                                 |
| H3       | 0.9959      | -0.64443    | 45.27         | -2.1                           | 0.0                              | 7.6                                      | 1                                         | 0                                           | -6                                                  | 162                                       | 56                                          | -351                                                |
| O3       | 9.1111      | -75.81930   | 119.05        | 0.7                            | 4.3                              | 0.9                                      | -1                                        | 0                                           | 4                                                   | -156                                      | 19                                          | 56                                                  |
| H(O3)    | 0.3969      | -0.35357    | 20.74         | 0.8                            | -0.1                             | 4.9                                      | -1                                        | 0                                           | -3                                                  | -52                                       | -21                                         | -181                                                |
| C4       | 5.9260      | -38.04971   | 54.74         | -3.1                           | -0.8                             | 4.3                                      | 0                                         | 0                                           | -1                                                  | 42                                        | -27                                         | -6                                                  |
| H4a      | 0.9762      | -0.62137    | 45.90         | 1.4                            | -0.1                             | -9.2                                     | -1                                        | 0                                           | 8                                                   | 51                                        | 23                                          | 952                                                 |
| H4e      | 0.9673      | -0.61634    | 46.99         | 0.4                            | -0.1                             | -0.4                                     | 0                                         | 0                                           | 0                                                   | 17                                        | 45                                          | -18                                                 |
| C5       | 5.7221      | -37.91335   | 48.02         | -8.7                           | 1.0                              | 7.4                                      | 2                                         | 0                                           | -1                                                  | 125                                       | 47                                          | 23                                                  |
| H5       | 0.9645      | -0.62347    | 45.96         | -1.1                           | -0.1                             | 0.7                                      | 0                                         | 0                                           | 0                                                   | -39                                       | 11                                          | 192                                                 |
| C6       | 5.9367      | -38.01607   | 58.10         | -2.1                           | 0.2                              | 3.6                                      | 0                                         | 0                                           | 0                                                   | 19                                        | -53                                         | 20                                                  |
| H6a      | 0.9772      | -0.62196    | 46.52         | 1.8                            | -0.1                             | 0.2                                      | -1                                        | 0                                           | 0                                                   | -87                                       | 48                                          | -164                                                |
| H6e      | 0.9878      | -0.62852    | 47.24         | -0.7                           | 0.0                              | 2.5                                      | 0                                         | 0                                           | -2                                                  | -179                                      | 34                                          | -159                                                |
| C7       | 5.9356      | -38.01448   | 58.05         | -4.2                           | 1.0                              | 4.2                                      | 0                                         | 0                                           | 0                                                   | -157                                      | 58                                          | 32                                                  |
| H7e      | 0.9838      | -0.62698    | 47.12         | -1.2                           | 0.0                              | 3.3                                      | 0                                         | 0                                           | -3                                                  | -71                                       | 9                                           | -243                                                |
| H7a      | 0.9787      | -0.62278    | 46.38         | 1.6                            | -0.1                             | 1.4                                      | -2                                        | 0                                           | -2                                                  | -123                                      | 54                                          | -184                                                |
| N8       | 8.0227      | -55.34572   | 58.90         | 16.3                           | 2.6                              | 13.8                                     | -9                                        | 0                                           | -2                                                  | -211                                      | 22                                          | -564                                                |
| H8       | 0.4938      | -0.40766    | 16.42         | -18.1                          | -1.0                             | -0.7                                     | 13                                        | 0                                           | -3                                                  | 2168                                      | 11                                          | -2838                                               |
| C8       | 5.6661      | -37.86146   | 63.34         | -11.4                          | -3.1                             | -2.3                                     | 3                                         | -2                                          | 2                                                   | 40                                        | -136                                        | -554                                                |
| Ha-(C8)  | 0.9183      | -0.59701    | 43.89         | 1.2                            | -0.7                             | 24.9                                     | -2                                        | 1                                           | -25                                                 | -165                                      | 61                                          | -1829                                               |
| Ha+(C8)  | 0.9538      | -0.61058    | 46.64         | 0.1                            | -0.4                             | -10.1                                    | -1                                        | 1                                           | 9                                                   | -144                                      | -35                                         | 863                                                 |
| Hc(C8)   | 0.9605      | -0.61724    | 44.11         | 2.2                            | -0.4                             | -8.3                                     | -3                                        | 0                                           | 7                                                   | -412                                      | -1                                          | 243                                                 |

**Supplementary Table 2.9b** Integrated properties of morphine in ME3.

| Atom     | $N(\Omega)$ | $E(\Omega)$ | $\nu(\Omega)$ | $\Delta_{\text{def}}E(\Omega)$ | $-\Delta_{\text{BSSE}}E(\Omega)$ | $\Delta_{\text{b}}^{\text{CP}}E(\Omega)$ | $\Delta_{\text{def}}N(\Omega) \cdot 10^3$ | $-\Delta_{\text{BSSE}}N(\Omega) \cdot 10^3$ | $\Delta_{\text{b}}^{\text{CP}}N(\Omega) \cdot 10^3$ | $\Delta_{\text{def}}V(\Omega) \cdot 10^3$ | $-\Delta_{\text{BSSE}}V(\Omega) \cdot 10^3$ | $\Delta_{\text{b}}^{\text{CP}}V(\Omega) \cdot 10^3$ |
|----------|-------------|-------------|---------------|--------------------------------|----------------------------------|------------------------------------------|-------------------------------------------|---------------------------------------------|-----------------------------------------------------|-------------------------------------------|---------------------------------------------|-----------------------------------------------------|
| C1       | 5.9856      | -38.03097   | 83.39         | -4.8                           | 0.5                              | 7.3                                      | 1                                         | 0                                           | -8                                                  | 7                                         | 11                                          | -483                                                |
| H1       | 0.9647      | -0.61262    | 48.07         | -1.9                           | 0.0                              | 13.8                                     | 1                                         | 0                                           | -14                                                 | 54                                        | 5                                           | -954                                                |
| C2       | 5.9944      | -38.03939   | 83.32         | -5.6                           | -3.1                             | 11.0                                     | -3                                        | 0                                           | -4                                                  | -89                                       | 142                                         | -253                                                |
| H2       | 0.9694      | -0.61398    | 47.92         | 1.5                            | 0.2                              | 5.3                                      | -2                                        | 0                                           | -5                                                  | -44                                       | 16                                          | -343                                                |
| C3       | 5.4436      | -37.73944   | 60.23         | -33.3                          | -14.4                            | -27.3                                    | 15                                        | -1                                          | 20                                                  | 308                                       | 7                                           | 542                                                 |
| O3       | 9.1739      | -75.89260   | 119.47        | 68.8                           | -4.5                             | -86.9                                    | -8                                        | 1                                           | 54                                                  | 450                                       | -182                                        | -2263                                               |
| H(O3)    | 0.3699      | -0.33543    | 18.15         | 3.2                            | 2.0                              | 34.4                                     | 0                                         | 0                                           | -23                                                 | 190                                       | 72                                          | -2883                                               |
| C4       | 5.5367      | -37.87345   | 59.57         | -18.1                          | -2.5                             | -12.0                                    | 2                                         | 0                                           | 12                                                  | -57                                       | -14                                         | 290                                                 |
| O        | 9.0161      | -75.77395   | 106.02        | 54.7                           | 5.1                              | -38.0                                    | -18                                       | 1                                           | 37                                                  | 12                                        | -99                                         | 2221                                                |
| C5       | 5.5704      | -37.88959   | 41.73         | -13.1                          | 0.1                              | -11.3                                    | 5                                         | -1                                          | 9                                                   | 162                                       | -53                                         | 105                                                 |
| H5       | 0.9937      | -0.65210    | 42.61         | -0.2                           | -0.1                             | 1.0                                      | -1                                        | 0                                           | -1                                                  | -69                                       | -19                                         | -7                                                  |
| C6       | 5.4204      | -37.69319   | 44.67         | -23.5                          | 0.7                              | -0.5                                     | 8                                         | 0                                           | 5                                                   | 291                                       | -146                                        | 167                                                 |
| H6       | 0.9664      | -0.62404    | 47.04         | 4.2                            | -0.1                             | 4.5                                      | -2                                        | 0                                           | -4                                                  | 93                                        | 26                                          | -364                                                |
| O6       | 9.0956      | -75.80051   | 122.15        | 16.3                           | 2.5                              | -3.0                                     | -9                                        | 0                                           | 9                                                   | -253                                      | -76                                         | 593                                                 |
| H(O6)    | 0.4176      | -0.36348    | 22.68         | -4.8                           | -0.2                             | -1.0                                     | 3                                         | 0                                           | 1                                                   | 312                                       | -3                                          | 82                                                  |
| C7       | 6.0345      | -38.07444   | 81.17         | -0.1                           | -0.8                             | 5.9                                      | 3                                         | 0                                           | 1                                                   | 154                                       | -73                                         | 181                                                 |
| H7       | 0.9422      | -0.60252    | 46.30         | -8.9                           | 0.0                              | 8.9                                      | 8                                         | 0                                           | -8                                                  | 547                                       | 21                                          | -545                                                |
| C8       | 6.0249      | -38.04618   | 83.44         | -3.8                           | 0.5                              | 6.7                                      | -4                                        | 0                                           | -4                                                  | -378                                      | 0                                           | -328                                                |
| H8       | 0.9545      | -0.60726    | 47.68         | -0.6                           | 0.1                              | 12.5                                     | -1                                        | 0                                           | -12                                                 | -179                                      | 77                                          | -834                                                |
| C9       | 5.7578      | -37.89239   | 48.46         | 1.2                            | 1.3                              | 4.9                                      | -1                                        | 0                                           | -1                                                  | 165                                       | -32                                         | 37                                                  |
| H9       | 0.9660      | -0.62539    | 46.04         | -1.2                           | -0.1                             | 12.0                                     | 0                                         | 0                                           | -10                                                 | 10                                        | 3                                           | -634                                                |
| C10      | 5.9275      | -37.99867   | 58.33         | -4.5                           | 0.9                              | 1.4                                      | 1                                         | 0                                           | 1                                                   | 159                                       | -67                                         | 138                                                 |
| H10e     | 0.9898      | -0.62846    | 46.18         | -1.4                           | 0.0                              | 11.5                                     | 0                                         | 0                                           | -10                                                 | -44                                       | 35                                          | -545                                                |
| H10a     | 0.9603      | -0.61331    | 46.75         | -1.3                           | 0.0                              | 8.1                                      | 1                                         | 0                                           | -7                                                  | -35                                       | 17                                          | -551                                                |
| C11      | 6.0161      | -38.10505   | 69.09         | -3.6                           | 0.2                              | 10.6                                     | 1                                         | -1                                          | -7                                                  | 443                                       | -360                                        | -353                                                |
| C12      | 6.0412      | -38.26355   | 59.42         | -4.9                           | 1.2                              | 12.1                                     | -1                                        | 0                                           | -5                                                  | 102                                       | 16                                          | -94                                                 |
| C13      | 5.9569      | -38.12243   | 41.16         | 5.9                            | 1.4                              | 6.6                                      | 1                                         | 0                                           | -1                                                  | 271                                       | 24                                          | -23                                                 |
| C14      | 5.9474      | -38.05351   | 49.35         | -7.2                           | 1.3                              | 3.7                                      | 0                                         | 0                                           | 0                                                   | 41                                        | 87                                          | 21                                                  |
| H14      | 1.0221      | -0.66287    | 41.93         | -2.2                           | 0.0                              | 6.5                                      | 0                                         | 0                                           | -7                                                  | -180                                      | 28                                          | -487                                                |
| C15      | 5.9255      | -38.02193   | 55.85         | 2.3                            | 0.7                              | 5.1                                      | -1                                        | 0                                           | 0                                                   | 111                                       | 0                                           | 2                                                   |
| H15e     | 0.9637      | -0.61592    | 45.37         | 0.4                            | -0.1                             | -11.2                                    | 0                                         | 0                                           | 10                                                  | 138                                       | 29                                          | 576                                                 |
| H15a     | 1.0014      | -0.63175    | 48.46         | -1.0                           | 0.0                              | 6.0                                      | 0                                         | 0                                           | -6                                                  | 164                                       | -16                                         | -411                                                |
| C16      | 5.7277      | -37.90048   | 53.87         | 0.4                            | 1.7                              | 6.3                                      | -1                                        | 1                                           | -3                                                  | -48                                       | 87                                          | -59                                                 |
| H16e     | 0.9560      | -0.61715    | 45.67         | -0.9                           | 0.0                              | 9.6                                      | 0                                         | 0                                           | -8                                                  | -19                                       | 66                                          | -503                                                |
| H16a     | 0.9491      | -0.61814    | 42.13         | 0.8                            | 0.0                              | -3.2                                     | 0                                         | 0                                           | 2                                                   | 233                                       | 29                                          | 3                                                   |
| N17      | 7.9561      | -55.22526   | 58.83         | -2.8                           | 2.6                              | 0.6                                      | -2                                        | 0                                           | 3                                                   | -112                                      | 127                                         | 31                                                  |
| H17      | 0.5656      | -0.45135    | 27.24         | -0.6                           | 0.0                              | 6.8                                      | 0                                         | 0                                           | -5                                                  | -12                                       | 29                                          | -321                                                |
| C17      | 5.6756      | -37.86496   | 62.96         | -7.8                           | 1.8                              | 0.9                                      | 3                                         | 0                                           | 2                                                   | 112                                       | 18                                          | 28                                                  |
| Ha+(C17) | 0.9400      | -0.60472    | 45.39         | 0.3                            | 0.0                              | 8.6                                      | 0                                         | 0                                           | -8                                                  | 75                                        | -26                                         | -414                                                |
| Ha-(C17) | 0.9377      | -0.60416    | 45.31         | 0.4                            | 0.0                              | 8.1                                      | 0                                         | 0                                           | -7                                                  | -36                                       | 33                                          | -333                                                |
| Hc(C17)  | 0.9412      | -0.60796    | 43.68         | 0.9                            | 0.0                              | -1.2                                     | -1                                        | 0                                           | 1                                                   | 53                                        | 77                                          | -79                                                 |

**Supplementary Table 2.10a** Integrated properties of ecgonine methyl ester in ME4.

| Atom     | $N(\Omega)$ | $E(\Omega)$ | $\nu(\Omega)$ | $\Delta_{\text{def}}E(\Omega)$ | $-\Delta_{\text{BSSE}}E(\Omega)$ | $\Delta_{\text{b}}^{\text{CP}}E(\Omega)$ | $\Delta_{\text{def}}N(\Omega) \cdot 10^3$ | $-\Delta_{\text{BSSE}}N(\Omega) \cdot 10^3$ | $\Delta_{\text{b}}^{\text{CP}}N(\Omega) \cdot 10^3$ | $\Delta_{\text{def}}V(\Omega) \cdot 10^3$ | $-\Delta_{\text{BSSE}}V(\Omega) \cdot 10^3$ | $\Delta_{\text{b}}^{\text{CP}}V(\Omega) \cdot 10^3$ |
|----------|-------------|-------------|---------------|--------------------------------|----------------------------------|------------------------------------------|-------------------------------------------|---------------------------------------------|-----------------------------------------------------|-------------------------------------------|---------------------------------------------|-----------------------------------------------------|
| C1       | 5.7245      | -37.91291   | 47.08         | -0.1                           | 0.6                              | 2.4                                      | 1                                         | -1                                          | 2                                                   | 1                                         | -22                                         | 137                                                 |
| H1       | 0.9623      | -0.62283    | 45.67         | 1.6                            | 0.0                              | 0.1                                      | -1                                        | 0                                           | 0                                                   | -99                                       | 17                                          | -25                                                 |
| C2       | 5.9508      | -38.07932   | 48.64         | -5.4                           | -0.5                             | 10.7                                     | -1                                        | 0                                           | -1                                                  | -155                                      | -27                                         | 57                                                  |
| H2       | 0.9575      | -0.61929    | 44.56         | -3.0                           | -0.1                             | 7.5                                      | 1                                         | 0                                           | -7                                                  | -231                                      | -10                                         | -406                                                |
| C1'      | 4.3813      | -37.02719   | 33.72         | 1.9                            | -11.7                            | 14.9                                     | -1                                        | 0                                           | 0                                                   | -8                                        | -71                                         | -40                                                 |
| O1'      | 9.2346      | -76.00089   | 123.05        | 57.2                           | 0.8                              | -54.1                                    | -3                                        | 0                                           | 30                                                  | 2068                                      | -206                                        | -2505                                               |
| O2'      | 9.0963      | -75.97919   | 99.83         | -31.8                          | 1.8                              | 24.9                                     | 6                                         | 0                                           | -8                                                  | -192                                      | -81                                         | -264                                                |
| C3'      | 5.5391      | -37.76265   | 63.07         | 0.6                            | -0.3                             | 1.6                                      | -2                                        | 0                                           | -1                                                  | 21                                        | 76                                          | 196                                                 |
| Ht(C3')  | 0.9376      | -0.60804    | 45.10         | -1.9                           | -0.1                             | 8.4                                      | 1                                         | 0                                           | -7                                                  | 85                                        | -13                                         | -390                                                |
| Hg+(C3') | 0.9521      | -0.61219    | 46.85         | -0.1                           | 0.0                              | -2.3                                     | 0                                         | 0                                           | 3                                                   | -11                                       | 32                                          | 1205                                                |
| Hg-(C3') | 0.9476      | -0.61023    | 46.96         | -0.1                           | 0.0                              | -4.0                                     | 0                                         | 0                                           | 3                                                   | 194                                       | 13                                          | 1295                                                |
| C3       | 5.4398      | -37.69931   | 41.75         | -0.7                           | 1.2                              | -1.6                                     | 1                                         | 0                                           | 2                                                   | 130                                       | -17                                         | -37                                                 |
| H3       | 0.9945      | -0.64396    | 45.16         | -1.1                           | 0.0                              | 7.8                                      | 1                                         | 0                                           | -7                                                  | 163                                       | 1                                           | -416                                                |
| O3       | 9.1114      | -75.81884   | 119.35        | -1.6                           | 2.2                              | 6.6                                      | -1                                        | 0                                           | 4                                                   | -265                                      | 15                                          | 463                                                 |
| H(O3)    | 0.3964      | -0.35334    | 20.63         | 0.9                            | 0.0                              | 5.2                                      | -1                                        | 0                                           | -4                                                  | -50                                       | -40                                         | -284                                                |
| C4       | 5.9265      | -38.04946   | 54.70         | -1.9                           | -0.6                             | 3.5                                      | 0                                         | 0                                           | 0                                                   | 7                                         | -20                                         | -16                                                 |
| H4a      | 0.9750      | -0.62059    | 45.72         | 1.4                            | -0.1                             | -7.2                                     | 0                                         | 0                                           | 7                                                   | 177                                       | 22                                          | 633                                                 |
| H4e      | 0.9646      | -0.61533    | 46.77         | -0.8                           | 0.0                              | 3.4                                      | 1                                         | 0                                           | -3                                                  | 29                                        | 27                                          | -226                                                |
| C5       | 5.7257      | -37.91403   | 48.04         | -5.7                           | 1.0                              | 2.6                                      | 3                                         | 0                                           | 2                                                   | 222                                       | -28                                         | 15                                                  |
| H5       | 0.9614      | -0.62203    | 45.70         | 0.3                            | 0.0                              | 3.0                                      | 0                                         | 0                                           | -2                                                  | -7                                        | 40                                          | -128                                                |
| C6       | 5.9360      | -38.01599   | 58.14         | -3.1                           | 1.2                              | 3.9                                      | 0                                         | 0                                           | 0                                                   | -15                                       | -7                                          | 47                                                  |
| H6a      | 0.9753      | -0.62136    | 46.32         | 0.3                            | -0.1                             | 3.2                                      | 0                                         | 0                                           | -3                                                  | -34                                       | 5                                           | -365                                                |
| H6e      | 0.9844      | -0.62697    | 47.17         | 0.0                            | 0.0                              | 5.9                                      | 0                                         | 0                                           | -5                                                  | -56                                       | 9                                           | -316                                                |
| C7       | 5.9353      | -38.01467   | 58.01         | -4.7                           | 1.0                              | 4.3                                      | -1                                        | 0                                           | 0                                                   | -82                                       | 1                                           | -30                                                 |
| H7e      | 0.9813      | -0.62594    | 46.96         | -0.7                           | 0.0                              | 5.5                                      | 0                                         | 0                                           | -5                                                  | -49                                       | -9                                          | -411                                                |
| H7a      | 0.9774      | -0.62215    | 46.33         | 0.2                            | -0.1                             | 4.5                                      | -1                                        | 0                                           | -4                                                  | -82                                       | 10                                          | -238                                                |
| N8       | 8.0238      | -55.34685   | 59.61         | 16.4                           | 1.3                              | 11.9                                     | -7                                        | 0                                           | -3                                                  | 9                                         | -42                                         | -2                                                  |
| H8       | 0.4977      | -0.40974    | 19.29         | -11.2                          | -0.1                             | -14.1                                    | 8                                         | 0                                           | 6                                                   | 1317                                      | 4                                           | 895                                                 |
| C8       | 5.6642      | -37.85638   | 64.13         | -7.6                           | 0.2                              | 3.9                                      | 2                                         | -1                                          | 1                                                   | 13                                        | -57                                         | 168                                                 |
| Ha-(C8)  | 0.9422      | -0.60576    | 45.80         | -0.2                           | -0.2                             | 2.8                                      | 0                                         | 0                                           | -2                                                  | -70                                       | 18                                          | 25                                                  |
| Ha+(C8)  | 0.9459      | -0.60718    | 45.99         | 1.4                            | -0.1                             | -2.7                                     | -1                                        | 0                                           | 2                                                   | -94                                       | 14                                          | 109                                                 |
| Hc(C8)   | 0.9504      | -0.61242    | 43.85         | 1.3                            | -0.1                             | 5.0                                      | -1                                        | 0                                           | -4                                                  | -171                                      | 35                                          | -306                                                |

**Supplementary Table 2.10b** Integrated properties of morphine in ME4.

| Atom     | $N(\Omega)$ | $E(\Omega)$ | $\nu(\Omega)$ | $\Delta_{\text{def}}E(\Omega)$ | $-\Delta_{\text{BSSE}}E(\Omega)$ | $\Delta_{\text{b}}^{\text{CP}}E(\Omega)$ | $\Delta_{\text{def}}N(\Omega) \cdot 10^3$ | $-\Delta_{\text{BSSE}}N(\Omega) \cdot 10^3$ | $\Delta_{\text{b}}^{\text{CP}}N(\Omega) \cdot 10^3$ | $\Delta_{\text{def}}V(\Omega) \cdot 10^3$ | $-\Delta_{\text{BSSE}}V(\Omega) \cdot 10^3$ | $\Delta_{\text{b}}^{\text{CP}}V(\Omega) \cdot 10^3$ |
|----------|-------------|-------------|---------------|--------------------------------|----------------------------------|------------------------------------------|-------------------------------------------|---------------------------------------------|-----------------------------------------------------|-------------------------------------------|---------------------------------------------|-----------------------------------------------------|
| C1       | 5.9905      | -38.03205   | 83.70         | -3.6                           | 0.8                              | 3.2                                      | 0                                         | 0                                           | -4                                                  | -45                                       | 65                                          | -271                                                |
| H1       | 0.9693      | -0.61447    | 48.39         | -0.7                           | 0.0                              | 7.4                                      | 0                                         | 0                                           | -7                                                  | 51                                        | -48                                         | -519                                                |
| C2       | 5.9812      | -38.03805   | 82.82         | -0.8                           | -3.2                             | -0.4                                     | -1                                        | 0                                           | 3                                                   | -18                                       | 45                                          | 110                                                 |
| H2       | 0.9546      | -0.60872    | 46.96         | 0.1                            | 0.0                              | -12.1                                    | 0                                         | 0                                           | 11                                                  | 27                                        | 6                                           | 662                                                 |
| C3       | 5.4333      | -37.73403   | 59.88         | -16.2                          | -8.8                             | -14.1                                    | 11                                        | -1                                          | 12                                                  | 361                                       | -50                                         | 369                                                 |
| O3       | 9.1685      | -75.88360   | 125.13        | 56.8                           | -4.3                             | -57.6                                    | -7                                        | 0                                           | 42                                                  | 403                                       | -189                                        | 2938                                                |
| H(O3)    | 0.3673      | -0.33498    | 16.73         | 2.6                            | 0.1                              | 22.6                                     | 0                                         | 1                                           | -16                                                 | 125                                       | 109                                         | -3460                                               |
| C4       | 5.5587      | -37.88887   | 60.21         | 5.2                            | -3.4                             | 3.5                                      | -4                                        | 0                                           | 1                                                   | -99                                       | 12                                          | 4                                                   |
| O        | 9.0212      | -75.77895   | 107.99        | 0.5                            | 4.2                              | -11.7                                    | -3                                        | 0                                           | 10                                                  | -10                                       | -90                                         | 2485                                                |
| C5       | 5.5653      | -37.88679   | 41.65         | -9.3                           | 0.7                              | -6.3                                     | -2                                        | 0                                           | 3                                                   | -263                                      | 61                                          | -31                                                 |
| H5       | 0.9940      | -0.65228    | 42.57         | -1.1                           | -0.1                             | -0.7                                     | 0                                         | 0                                           | 1                                                   | -64                                       | -24                                         | 28                                                  |
| C6       | 5.4248      | -37.69663   | 44.65         | -20.1                          | 1.1                              | -10.4                                    | 7                                         | 0                                           | 8                                                   | 160                                       | 19                                          | 129                                                 |
| H6       | 0.9679      | -0.62487    | 47.06         | 2.3                            | -0.1                             | 2.2                                      | -1                                        | 0                                           | -2                                                  | 57                                        | 27                                          | -215                                                |
| O6       | 9.0950      | -75.79711   | 123.20        | 14.2                           | 2.2                              | 7.0                                      | -6                                        | 0                                           | 6                                                   | -135                                      | 36                                          | 1492                                                |
| H(O6)    | 0.4179      | -0.36361    | 22.75         | -2.0                           | 0.0                              | -1.4                                     | 1                                         | 0                                           | 1                                                   | 110                                       | -2                                          | 136                                                 |
| C7       | 6.0341      | -38.07446   | 81.24         | -0.3                           | -0.7                             | 5.3                                      | 1                                         | 0                                           | 1                                                   | 28                                        | 55                                          | 98                                                  |
| H7       | 0.9427      | -0.60269    | 46.35         | -4.2                           | 0.0                              | 5.0                                      | 4                                         | 0                                           | -5                                                  | 298                                       | 45                                          | -330                                                |
| C8       | 6.0256      | -38.04674   | 83.45         | -3.5                           | 0.6                              | 4.3                                      | -2                                        | 0                                           | -3                                                  | -270                                      | 32                                          | -247                                                |
| H8       | 0.9561      | -0.60788    | 47.77         | -0.5                           | 0.1                              | 9.0                                      | 0                                         | 0                                           | -9                                                  | -26                                       | -32                                         | -620                                                |
| C9       | 5.7582      | -37.89208   | 48.51         | 1.0                            | 1.4                              | 4.5                                      | -2                                        | 1                                           | -1                                                  | 40                                        | 123                                         | 16                                                  |
| H9       | 0.9680      | -0.62621    | 46.14         | -0.5                           | 0.0                              | 8.7                                      | 0                                         | 0                                           | -8                                                  | -13                                       | 88                                          | -601                                                |
| C10      | 5.9271      | -37.99767   | 58.45         | -2.4                           | 0.8                              | 1.2                                      | 1                                         | 0                                           | 1                                                   | 145                                       | -46                                         | 173                                                 |
| H10e     | 0.9921      | -0.62955    | 46.18         | -1.3                           | 0.0                              | 7.7                                      | 0                                         | 0                                           | -7                                                  | -26                                       | -18                                         | -422                                                |
| H10a     | 0.9624      | -0.61411    | 46.91         | -1.0                           | 0.0                              | 5.5                                      | 0                                         | 0                                           | -5                                                  | -64                                       | 39                                          | -421                                                |
| C11      | 6.0189      | -38.10463   | 69.44         | -3.5                           | 1.0                              | 7.9                                      | 0                                         | 0                                           | -5                                                  | -84                                       | 11                                          | -210                                                |
| C12      | 6.0410      | -38.26435   | 59.32         | 1.8                            | 0.6                              | 6.0                                      | 1                                         | 0                                           | -3                                                  | 219                                       | 39                                          | -98                                                 |
| C13      | 5.9579      | -38.12286   | 41.22         | 1.4                            | 0.9                              | 3.7                                      | 0                                         | 0                                           | 0                                                   | 138                                       | 43                                          | 34                                                  |
| C14      | 5.9474      | -38.05309   | 49.36         | -6.2                           | 0.5                              | 4.3                                      | 0                                         | 0                                           | 0                                                   | 5                                         | -6                                          | 151                                                 |
| H14      | 1.0234      | -0.66304    | 42.09         | -2.1                           | -0.1                             | 5.1                                      | 0                                         | 0                                           | -5                                                  | -163                                      | 30                                          | -354                                                |
| C15      | 5.9255      | -38.02305   | 55.81         | 1.6                            | 0.7                              | 1.7                                      | 0                                         | 1                                           | 0                                                   | 124                                       | 31                                          | -57                                                 |
| H15e     | 0.9618      | -0.61499    | 45.29         | 0.7                            | 0.0                              | -6.2                                     | 0                                         | 0                                           | 5                                                   | 186                                       | -7                                          | 327                                                 |
| H15a     | 1.0037      | -0.63259    | 48.62         | -0.8                           | 0.0                              | 3.8                                      | 0                                         | 0                                           | -4                                                  | 96                                        | -13                                         | -221                                                |
| C16      | 5.7293      | -37.90195   | 53.91         | -0.7                           | 1.1                              | 3.9                                      | 0                                         | 0                                           | -1                                                  | 28                                        | 62                                          | -43                                                 |
| H16e     | 0.9577      | -0.61782    | 45.76         | -0.2                           | 0.0                              | 6.7                                      | 0                                         | 0                                           | -6                                                  | -16                                       | 59                                          | -409                                                |
| H16a     | 0.9477      | -0.61759    | 42.03         | 0.4                            | 0.0                              | -3.3                                     | 0                                         | 0                                           | 2                                                   | 171                                       | -3                                          | 127                                                 |
| N17      | 7.9547      | -55.22483   | 58.77         | -2.6                           | 1.8                              | 1.0                                      | -1                                        | 0                                           | 1                                                   | -13                                       | 19                                          | -29                                                 |
| H17      | 0.5667      | -0.45199    | 27.32         | 0.3                            | 0.0                              | 4.7                                      | 0                                         | 0                                           | -3                                                  | 6                                         | -48                                         | -209                                                |
| C17      | 5.6748      | -37.86515   | 62.97         | -5.8                           | 1.4                              | 0.0                                      | 3                                         | 0                                           | 1                                                   | 206                                       | -86                                         | 146                                                 |
| Ha+(C17) | 0.9414      | -0.60546    | 45.47         | 0.4                            | 0.0                              | 6.3                                      | 0                                         | 0                                           | -6                                                  | 33                                        | -9                                          | -315                                                |
| Ha-(C17) | 0.9393      | -0.60487    | 45.30         | 0.4                            | 0.0                              | 5.9                                      | 0                                         | 0                                           | -5                                                  | 11                                        | 65                                          | -369                                                |
| Hc(C17)  | 0.9408      | -0.60787    | 43.62         | 0.2                            | 0.0                              | -1.6                                     | 0                                         | 0                                           | 1                                                   | -19                                       | 56                                          | 6                                                   |

**Supplementary Table 2.11a** Integrated properties of ecgonine methyl ester in ME5.

| Atom     | $N(\Omega)$ | $E(\Omega)$ | $\nu(\Omega)$ | $\Delta_{\text{def}}E(\Omega)$ | $-\Delta_{\text{BSSE}}E(\Omega)$ | $\Delta_{\text{b}}^{\text{CP}}E(\Omega)$ | $\Delta_{\text{def}}N(\Omega) \cdot 10^3$ | $-\Delta_{\text{BSSE}}N(\Omega) \cdot 10^3$ | $\Delta_{\text{b}}^{\text{CP}}N(\Omega) \cdot 10^3$ | $\Delta_{\text{def}}V(\Omega) \cdot 10^3$ | $-\Delta_{\text{BSSE}}V(\Omega) \cdot 10^3$ | $\Delta_{\text{b}}^{\text{CP}}V(\Omega) \cdot 10^3$ |
|----------|-------------|-------------|---------------|--------------------------------|----------------------------------|------------------------------------------|-------------------------------------------|---------------------------------------------|-----------------------------------------------------|-------------------------------------------|---------------------------------------------|-----------------------------------------------------|
| C1       | 5.7222      | -37.91148   | 46.95         | 2.3                            | 0.7                              | 3.5                                      | 0                                         | -1                                          | 1                                                   | -45                                       | -48                                         | 83                                                  |
| H1       | 0.9635      | -0.62331    | 45.76         | 1.6                            | 0.0                              | -1.2                                     | -2                                        | 0                                           | 1                                                   | -124                                      | 8                                           | 93                                                  |
| C2       | 5.9508      | -38.08010   | 48.59         | -4.9                           | -0.3                             | 7.9                                      | -2                                        | 0                                           | -1                                                  | -253                                      | -10                                         | 86                                                  |
| H2       | 0.9582      | -0.61982    | 44.48         | -3.8                           | -0.1                             | 7.1                                      | 1                                         | 0                                           | -6                                                  | -324                                      | -8                                          | -399                                                |
| C1'      | 4.3833      | -37.02928   | 33.78         | 4.4                            | -12.9                            | 7.8                                      | -2                                        | 0                                           | 3                                                   | -32                                       | -3                                          | -25                                                 |
| O1'      | 9.2352      | -76.00284   | 121.54        | 56.2                           | 0.5                              | -57.9                                    | -1                                        | 0                                           | 28                                                  | 2826                                      | -143                                        | -4836                                               |
| O2'      | 9.0967      | -75.98065   | 99.72         | -29.1                          | 2.5                              | 17.7                                     | 6                                         | 0                                           | -8                                                  | -194                                      | -41                                         | -420                                                |
| C3'      | 5.5361      | -37.75872   | 62.67         | 7.9                            | 1.6                              | 2.8                                      | -5                                        | 0                                           | -1                                                  | -90                                       | -30                                         | 4                                                   |
| Ht(C3')  | 0.9347      | -0.60678    | 44.93         | -3.1                           | 0.1                              | 12.8                                     | 2                                         | 0                                           | -11                                                 | 151                                       | -9                                          | -632                                                |
| Hg+(C3') | 0.9552      | -0.61352    | 46.11         | -0.3                           | 0.0                              | -5.7                                     | 1                                         | 0                                           | 5                                                   | 119                                       | 20                                          | 356                                                 |
| Hg-(C3') | 0.9530      | -0.61215    | 46.24         | -0.3                           | 0.0                              | -8.9                                     | 1                                         | 0                                           | 8                                                   | 235                                       | 36                                          | 505                                                 |
| C3       | 5.4373      | -37.69770   | 41.82         | 0.0                            | 1.4                              | 1.6                                      | -1                                        | 0                                           | 0                                                   | 12                                        | 78                                          | 46                                                  |
| H3       | 0.9953      | -0.64443    | 45.02         | -2.6                           | 0.1                              | 8.0                                      | 1                                         | 0                                           | -7                                                  | 50                                        | -11                                         | -432                                                |
| O3       | 9.1131      | -75.81967   | 119.55        | -0.8                           | 3.5                              | 2.3                                      | 0                                         | 0                                           | 5                                                   | 10                                        | -109                                        | 520                                                 |
| H(O3)    | 0.3964      | -0.35324    | 20.69         | 1.6                            | -0.1                             | 5.0                                      | -1                                        | 0                                           | -3                                                  | -100                                      | 18                                          | -213                                                |
| C4       | 5.9259      | -38.05011   | 54.75         | -3.2                           | -0.9                             | 3.5                                      | 0                                         | 0                                           | -1                                                  | -7                                        | 116                                         | -86                                                 |
| H4a      | 0.9769      | -0.62198    | 46.04         | -1.0                           | -0.1                             | -8.4                                     | 1                                         | 0                                           | 7                                                   | 166                                       | -52                                         | 1052                                                |
| H4e      | 0.9655      | -0.61539    | 46.89         | 0.8                            | -0.1                             | 1.7                                      | 0                                         | 0                                           | -1                                                  | 27                                        | -16                                         | -71                                                 |
| C5       | 5.7229      | -37.91319   | 48.08         | -8.0                           | 0.6                              | 7.7                                      | 4                                         | -1                                          | -2                                                  | 272                                       | -95                                         | 73                                                  |
| H5       | 0.9643      | -0.62327    | 46.02         | -0.1                           | 0.0                              | 0.2                                      | 0                                         | 0                                           | 0                                                   | 11                                        | 30                                          | 186                                                 |
| C6       | 5.9363      | -38.01613   | 58.07         | -2.2                           | 0.8                              | 3.0                                      | 0                                         | 0                                           | 0                                                   | -48                                       | 0                                           | -11                                                 |
| H6a      | 0.9754      | -0.62118    | 46.40         | 0.9                            | -0.2                             | 3.1                                      | -1                                        | 0                                           | -3                                                  | -130                                      | -1                                          | -193                                                |
| H6e      | 0.9869      | -0.62819    | 47.22         | -0.1                           | 0.0                              | 2.8                                      | 0                                         | 0                                           | -3                                                  | -125                                      | -15                                         | -185                                                |
| C7       | 5.9354      | -38.01482   | 57.97         | -5.2                           | 1.4                              | 4.0                                      | -1                                        | 0                                           | 0                                                   | -157                                      | 8                                           | 1                                                   |
| H7e      | 0.9822      | -0.62627    | 46.97         | -1.0                           | 0.0                              | 4.9                                      | 0                                         | 0                                           | -4                                                  | -83                                       | 3                                           | -378                                                |
| H7a      | 0.9778      | -0.62250    | 46.20         | 0.7                            | -0.1                             | 3.0                                      | -1                                        | 0                                           | -3                                                  | -131                                      | -6                                          | -293                                                |
| N8       | 8.0225      | -55.34688   | 58.79         | 18.9                           | 1.6                              | 9.2                                      | -9                                        | 1                                           | -3                                                  | -238                                      | 142                                         | -771                                                |
| H8       | 0.4933      | -0.40735    | 16.38         | -16.3                          | -0.6                             | -2.0                                     | 12                                        | 0                                           | -2                                                  | 2027                                      | 19                                          | -2754                                               |
| C8       | 5.6585      | -37.85581   | 63.49         | -11.6                          | 0.3                              | 9.3                                      | 1                                         | -1                                          | -4                                                  | -67                                       | -103                                        | -336                                                |
| Ha-(C8)  | 0.9405      | -0.60581    | 45.82         | -2.2                           | -0.4                             | 4.8                                      | 0                                         | 0                                           | -4                                                  | -92                                       | 12                                          | 92                                                  |
| Ha+(C8)  | 0.9490      | -0.60851    | 46.29         | 0.6                            | -0.2                             | -5.3                                     | -1                                        | 0                                           | 5                                                   | -167                                      | 11                                          | 497                                                 |
| Hc(C8)   | 0.9547      | -0.61449    | 43.92         | 2.5                            | -0.1                             | -1.7                                     | -3                                        | 0                                           | 1                                                   | -325                                      | -18                                         | -19                                                 |

**Supplementary Table 2.11b** Integrated properties of morphine in ME5.

| Atom     | $N(\Omega)$ | $E(\Omega)$ | $\nu(\Omega)$ | $\Delta_{\text{def}}E(\Omega)$ | $-\Delta_{\text{BSSE}}E(\Omega)$ | $\Delta_{\text{b}}^{\text{CP}}E(\Omega)$ | $\Delta_{\text{def}}N(\Omega)10^3$ | $-\Delta_{\text{BSSE}}N(\Omega) \cdot 10^3$ | $\Delta_{\text{b}}^{\text{CP}}N(\Omega) \cdot 10^3$ | $\Delta_{\text{def}}V(\Omega) \cdot 10^3$ | $-\Delta_{\text{BSSE}}V(\Omega) \cdot 10^3$ | $\Delta_{\text{b}}^{\text{CP}}V(\Omega) \cdot 10^3$ |
|----------|-------------|-------------|---------------|--------------------------------|----------------------------------|------------------------------------------|------------------------------------|---------------------------------------------|-----------------------------------------------------|-------------------------------------------|---------------------------------------------|-----------------------------------------------------|
| C1       | 5.9898      | -38.03267   | 83.59         | -7.0                           | 0.4                              | 5.4                                      | 0                                  | 0                                           | -4                                                  | -66                                       | 37                                          | -335                                                |
| H1       | 0.9666      | -0.61339    | 48.21         | -0.7                           | 0.0                              | 10.2                                     | 0                                  | 0                                           | -10                                                 | 6                                         | -15                                         | -685                                                |
| C2       | 5.9761      | -38.03688   | 82.53         | -6.6                           | 0.1                              | 5.2                                      | 0                                  | 0                                           | -3                                                  | -4                                        | 18                                          | -168                                                |
| H2       | 0.9353      | -0.60101    | 45.73         | 0.2                            | 0.0                              | 8.1                                      | 0                                  | 0                                           | -8                                                  | 3                                         | -49                                         | -480                                                |
| C3       | 5.4133      | -37.72037   | 59.20         | -4.9                           | -0.1                             | 1.5                                      | 0                                  | 0                                           | 1                                                   | 1                                         | -9                                          | 18                                                  |
| O3       | 9.1298      | -75.88003   | 121.85        | -6.2                           | 2.4                              | 9.0                                      | -1                                 | 0                                           | -3                                                  | 36                                        | -40                                         | -128                                                |
| H(O3)    | 0.3876      | -0.34809    | 20.27         | -0.2                           | 0.3                              | -9.3                                     | -1                                 | 0                                           | 6                                                   | -54                                       | 13                                          | 348                                                 |
| C4       | 5.5810      | -37.90040   | 60.75         | -18.3                          | 1.1                              | -7.7                                     | 11                                 | 0                                           | 8                                                   | 274                                       | 13                                          | 170                                                 |
| O        | 9.0190      | -75.77097   | 106.22        | 16.8                           | 1.9                              | -5.1                                     | -6                                 | 0                                           | 11                                                  | 149                                       | -53                                         | 528                                                 |
| C5       | 5.5562      | -37.87514   | 41.35         | 11.8                           | -0.9                             | 4.9                                      | -9                                 | -1                                          | 1                                                   | -247                                      | -235                                        | -52                                                 |
| H5       | 0.9925      | -0.65116    | 42.62         | -1.2                           | 0.1                              | 2.2                                      | 0                                  | 0                                           | -1                                                  | -7                                        | -63                                         | 59                                                  |
| C6       | 5.4423      | -37.70634   | 45.02         | -34.8                          | -4.8                             | -15.0                                    | 23                                 | -2                                          | 13                                                  | 739                                       | -166                                        | 115                                                 |
| H6       | 0.9743      | -0.62733    | 47.78         | 5.9                            | -0.1                             | -7.8                                     | -4                                 | 0                                           | 7                                                   | -23                                       | 29                                          | 588                                                 |
| O6       | 9.1430      | -75.81098   | 122.78        | 76.0                           | -3.5                             | -85.8                                    | -14                                | 1                                           | 61                                                  | 274                                       | -134                                        | 831                                                 |
| H(O6)    | 0.3899      | -0.34772    | 18.63         | 0.9                            | 0.2                              | 37.1                                     | 2                                  | 0                                           | -28                                                 | 209                                       | 159                                         | -4237                                               |
| C7       | 6.0344      | -38.07484   | 81.56         | 0.4                            | -3.8                             | 6.5                                      | -2                                 | -1                                          | 5                                                   | 73                                        | -36                                         | 454                                                 |
| H7       | 0.9522      | -0.60700    | 46.97         | -0.4                           | 0.1                              | -10.2                                    | 0                                  | 0                                           | 9                                                   | -34                                       | 20                                          | 646                                                 |
| C8       | 6.0215      | -38.04525   | 83.27         | -6.6                           | -1.3                             | 13.3                                     | 1                                  | 0                                           | -10                                                 | -92                                       | 21                                          | -597                                                |
| H8       | 0.9564      | -0.60820    | 47.75         | -1.8                           | 0.1                              | 9.4                                      | 1                                  | 0                                           | -10                                                 | -29                                       | -13                                         | -658                                                |
| C9       | 5.7578      | -37.89172   | 48.42         | 0.4                            | 0.7                              | 6.7                                      | -1                                 | 0                                           | -1                                                  | 65                                        | 54                                          | -30                                                 |
| H9       | 0.9692      | -0.62663    | 46.23         | 0.3                            | 0.0                              | 6.8                                      | 0                                  | 0                                           | -6                                                  | -13                                       | 15                                          | -442                                                |
| C10      | 5.9252      | -37.99817   | 58.31         | -5.6                           | 0.8                              | 3.2                                      | 0                                  | 0                                           | -1                                                  | 20                                        | -2                                          | 114                                                 |
| H10e     | 0.9910      | -0.62919    | 46.09         | -1.8                           | 0.0                              | 9.2                                      | 1                                  | 0                                           | -8                                                  | -54                                       | -21                                         | -483                                                |
| H10a     | 0.9648      | -0.61499    | 47.09         | 0.1                            | 0.0                              | 2.2                                      | 0                                  | 0                                           | -2                                                  | -51                                       | -35                                         | -165                                                |
| C11      | 6.0201      | -38.10654   | 69.33         | -5.3                           | -0.2                             | 5.8                                      | 0                                  | 0                                           | -3                                                  | -236                                      | 57                                          | -206                                                |
| C12      | 6.0424      | -38.26647   | 59.10         | -1.4                           | 0.9                              | 3.3                                      | -1                                 | 0                                           | 0                                                   | -43                                       | 9                                           | -22                                                 |
| C13      | 5.9584      | -38.12093   | 41.42         | 2.7                            | 0.3                              | 7.9                                      | 0                                  | 0                                           | 1                                                   | 179                                       | 42                                          | 201                                                 |
| C14      | 5.9475      | -38.05277   | 49.35         | -3.7                           | -0.4                             | 3.6                                      | 1                                  | -1                                          | 1                                                   | 130                                       | -85                                         | 89                                                  |
| H14      | 1.0249      | -0.66339    | 42.23         | -2.1                           | 0.0                              | 4.2                                      | 0                                  | 0                                           | -4                                                  | -107                                      | -13                                         | -221                                                |
| C15      | 5.9258      | -38.02283   | 55.83         | 1.7                            | -0.2                             | 2.8                                      | 0                                  | 0                                           | 1                                                   | 134                                       | -4                                          | -11                                                 |
| H15e     | 0.9577      | -0.61369    | 44.78         | -0.8                           | 0.0                              | -1.4                                     | 1                                  | 0                                           | 1                                                   | 80                                        | 18                                          | -104                                                |
| H15a     | 1.0096      | -0.63453    | 49.15         | 1.1                            | 0.0                              | -3.1                                     | 0                                  | 0                                           | 3                                                   | 161                                       | 2                                           | 229                                                 |
| C16      | 5.7292      | -37.90174   | 53.84         | -1.3                           | 0.9                              | 5.2                                      | 0                                  | 0                                           | -1                                                  | 32                                        | -56                                         | 10                                                  |
| H16e     | 0.9574      | -0.61785    | 45.68         | -0.7                           | 0.0                              | 7.2                                      | 0                                  | 0                                           | -7                                                  | -26                                       | -32                                         | -406                                                |
| H16a     | 0.9415      | -0.61479    | 41.62         | 0.2                            | 0.0                              | 4.2                                      | 0                                  | 0                                           | -4                                                  | 73                                        | -3                                          | -204                                                |
| N17      | 7.9544      | -55.22392   | 58.75         | -1.0                           | 1.0                              | 2.6                                      | -1                                 | 0                                           | 1                                                   | 0                                         | -37                                         | -22                                                 |
| H17      | 0.5692      | -0.45347    | 27.39         | 0.5                            | 0.0                              | 0.6                                      | 0                                  | 0                                           | -1                                                  | -19                                       | -5                                          | -136                                                |
| C17      | 5.6753      | -37.86492   | 63.05         | -6.3                           | 0.9                              | 1.7                                      | 3                                  | 0                                           | 2                                                   | 188                                       | -11                                         | 175                                                 |
| Ha+(C17) | 0.9416      | -0.60544    | 45.50         | 0.7                            | 0.0                              | 6.0                                      | -1                                 | 0                                           | -5                                                  | -1                                        | -4                                          | -268                                                |
| Ha-(C17) | 0.9384      | -0.60450    | 45.26         | 0.1                            | 0.0                              | 7.2                                      | 0                                  | 0                                           | -6                                                  | -20                                       | 15                                          | -325                                                |
| Hc(C17)  | 0.9374      | -0.60643    | 43.47         | -0.1                           | 0.0                              | 2.4                                      | 0                                  | 0                                           | -2                                                  | 14                                        | -13                                         | -102                                                |

**Supplementary Figure 1** Principal  $\Delta_{\text{def}}N(\Omega)$  (in au multiplied by  $10^3$ ) and  $\Delta_{\text{def}}E(\Omega)$  (in italics and expressed in  $\text{kJ mol}^{-1}$ ) values for **HE1**.

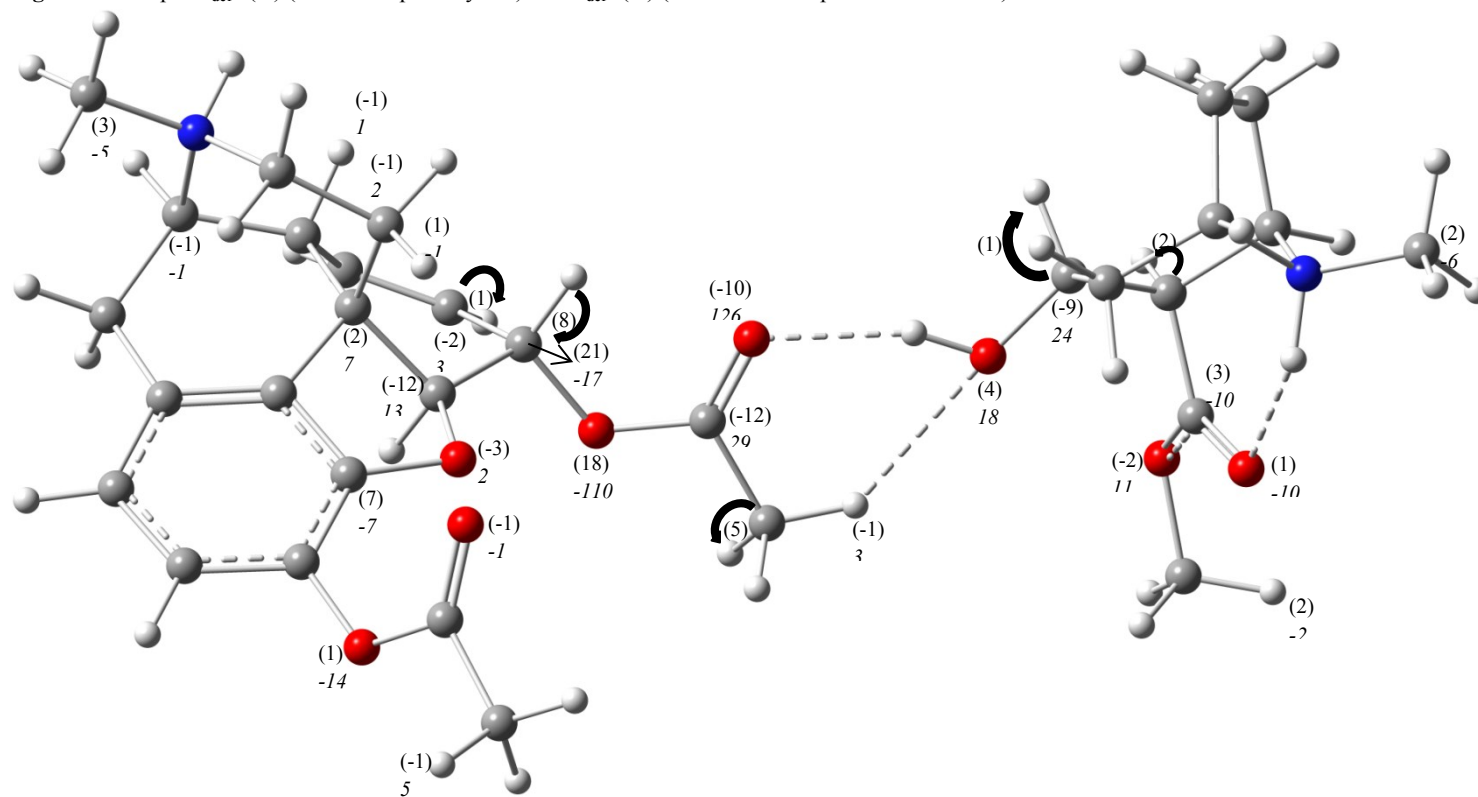



**Supplementary Figure 2** Principal  $\Delta_{\text{def}}N(\Omega)$  (in au multiplied by  $10^3$ ) and  $\Delta_{\text{def}}E(\Omega)$  (in italics and expressed in  $\text{kJ mol}^{-1}$ ) values for **HE2**.

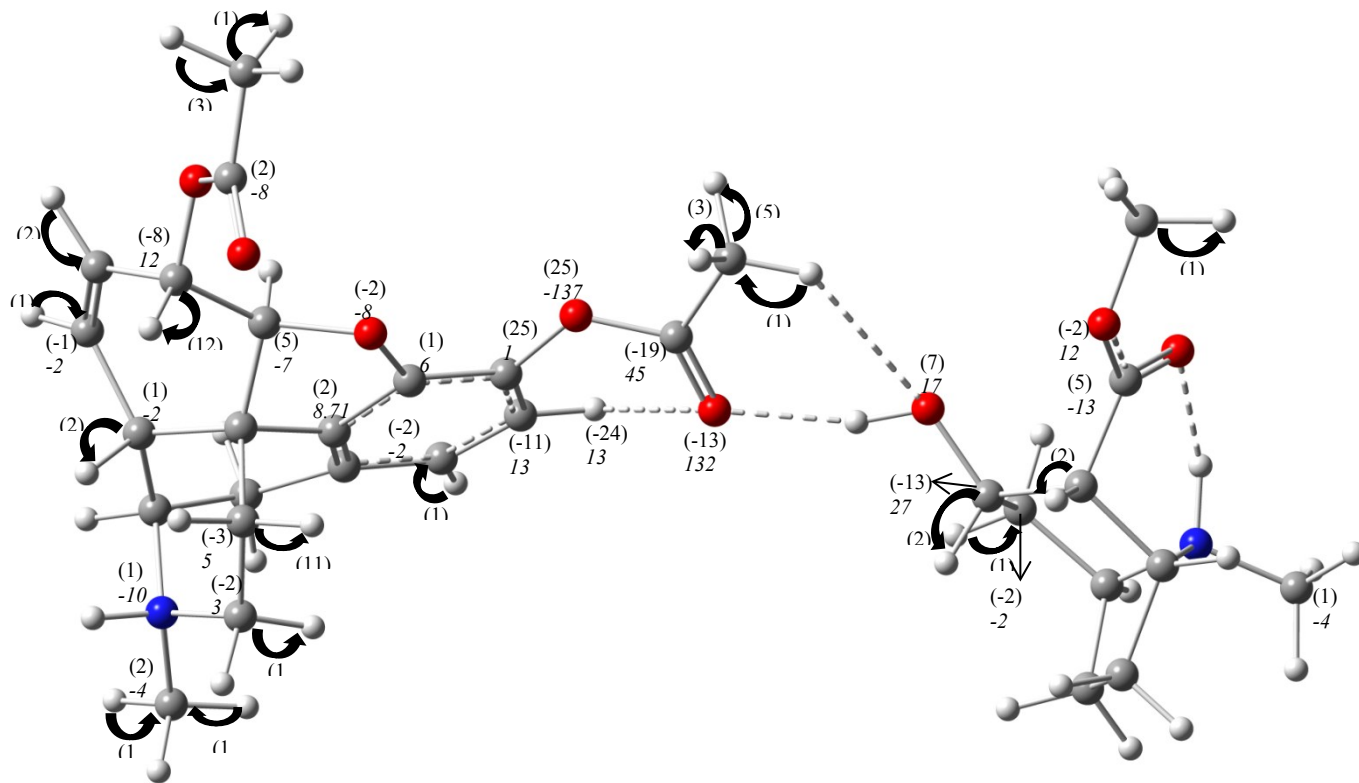

**Supplementary Figure 3** Principal  $\Delta_{\text{def}}N(\Omega)$  (in au multiplied by  $10^3$ ) and  $\Delta_{\text{def}}E(\Omega)$  (in italics and expressed in  $\text{kJ mol}^{-1}$ ) values for **MC1**.

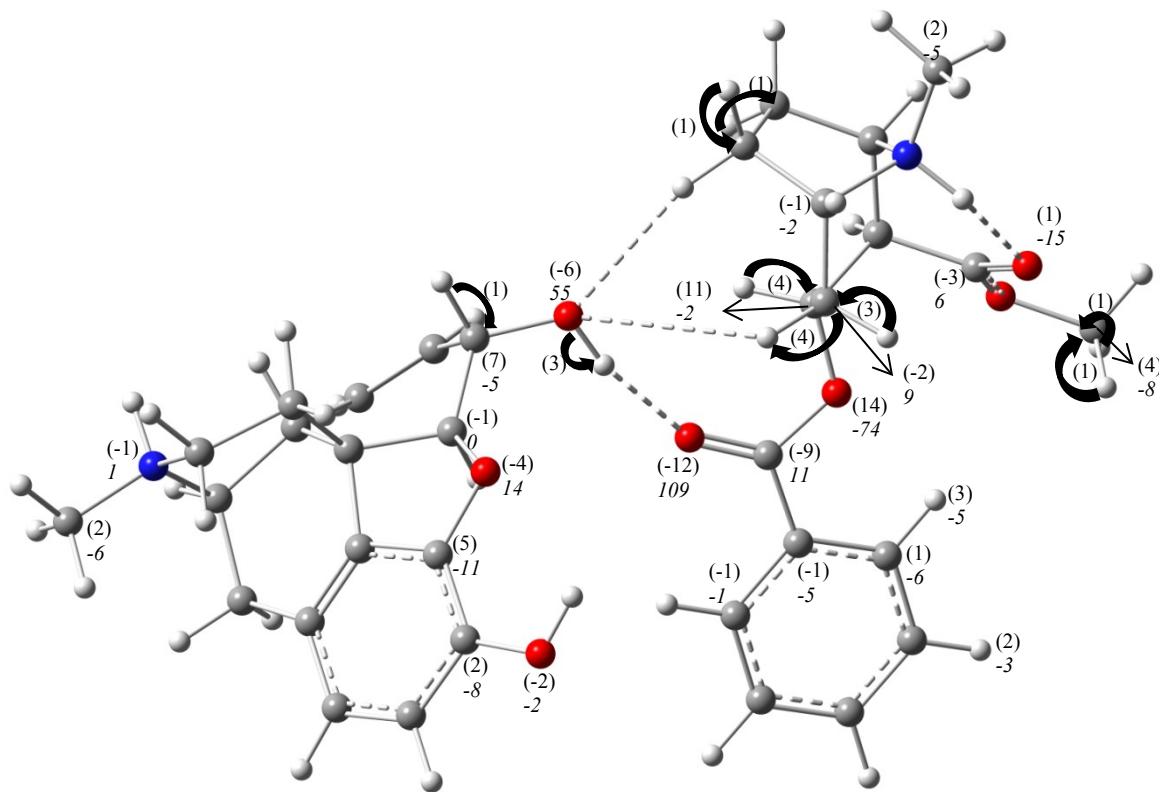

**Supplementary Figure 4** Principal  $\Delta_{\text{def}}N(\Omega)$  (in au multiplied by  $10^3$ ) and  $\Delta_{\text{def}}E(\Omega)$  (in italics and expressed in  $\text{kJ mol}^{-1}$ ) values for **MC2**.

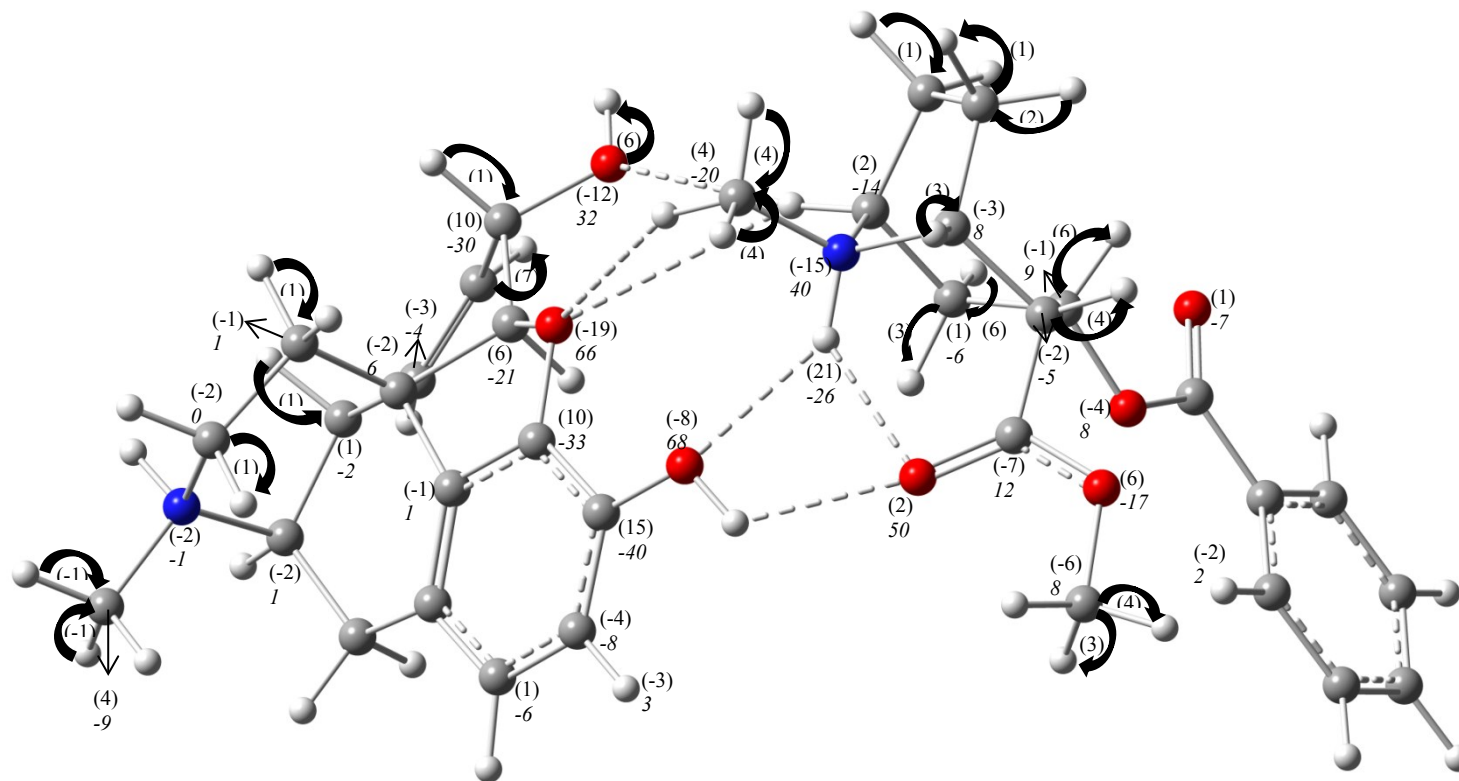

**Supplementary Figure 5** Principal  $\Delta_{\text{def}}N(\Omega)$  (in au multiplied by  $10^3$ ) and  $\Delta_{\text{def}}E(\Omega)$  (in italics and expressed in  $\text{kJ mol}^{-1}$ ) values for **MC3**.

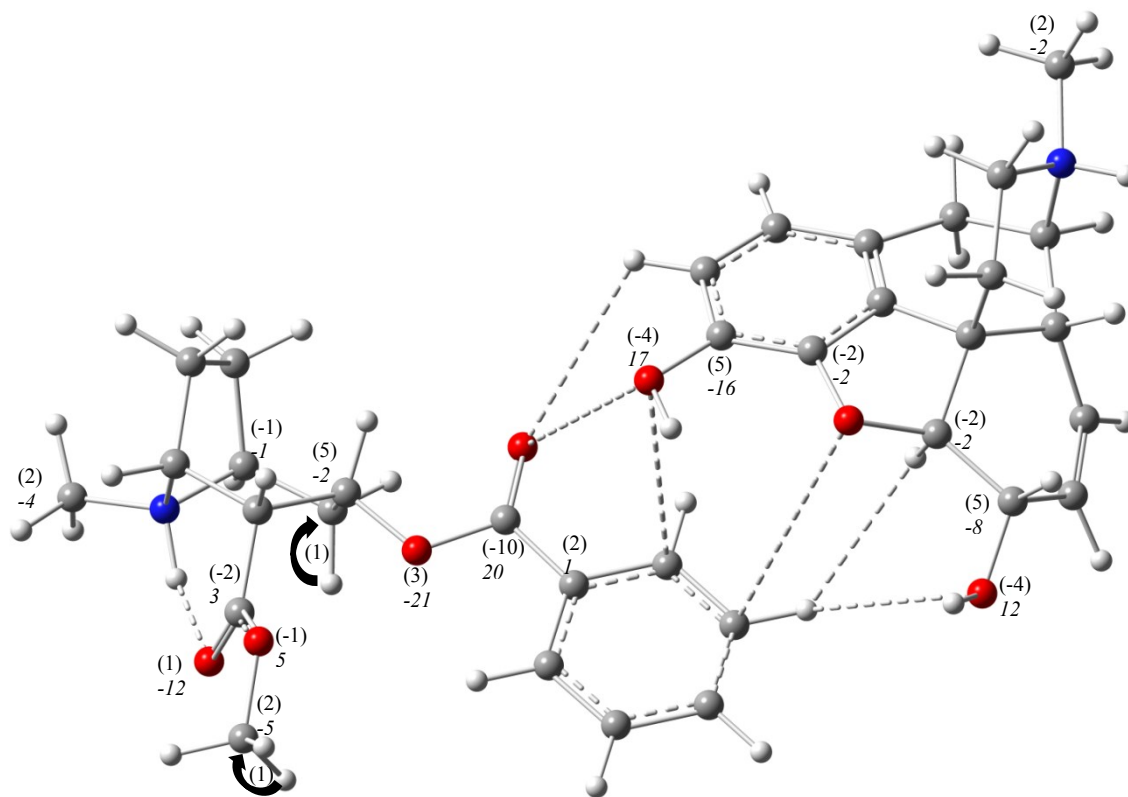

**Supplementary Figure 6** Principal  $\Delta_{\text{def}}N(\Omega)$  (in au multiplied by  $10^3$ ) and  $\Delta_{\text{def}}E(\Omega)$  (in italics and expressed in  $\text{kJ mol}^{-1}$ ) values for **MC4**.

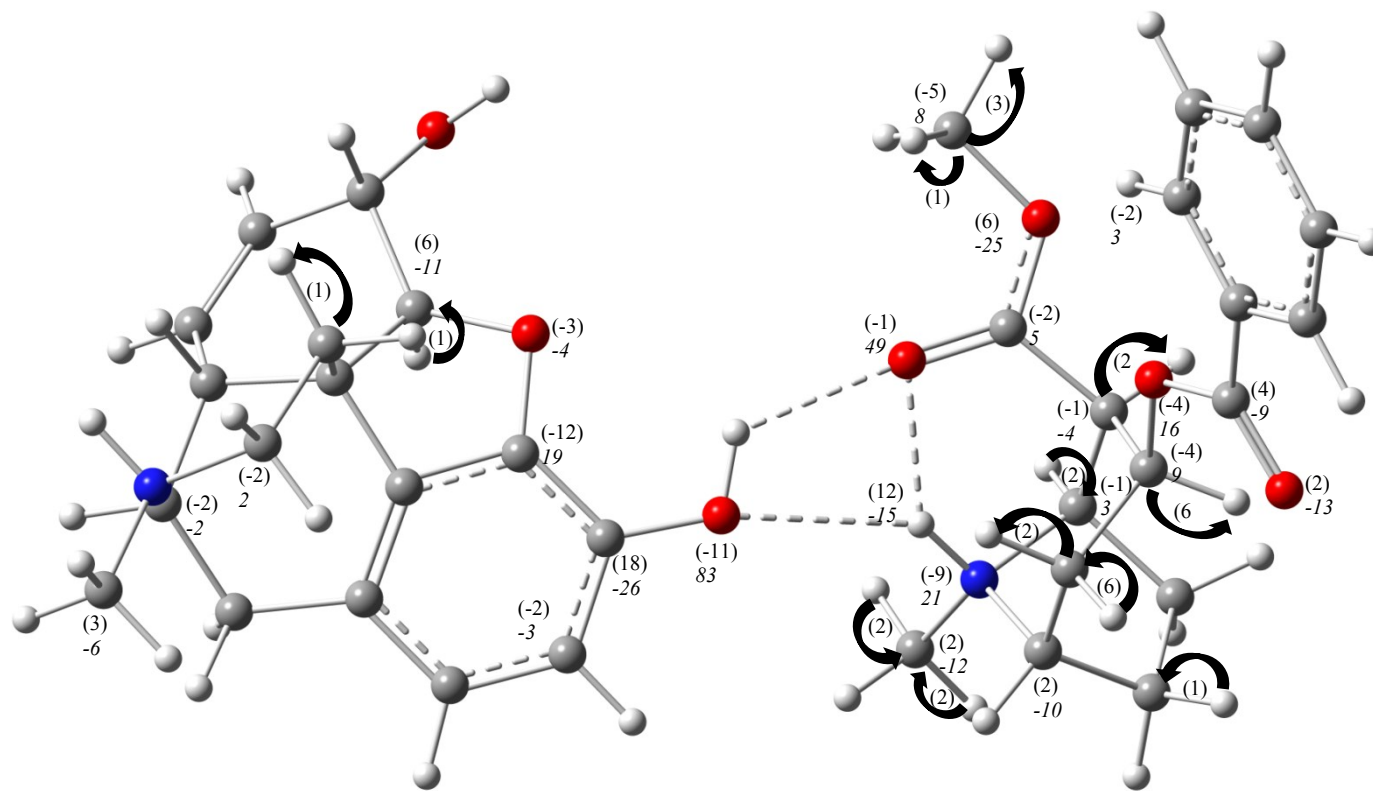

**Supplementary Figure 7** Principal  $\Delta_{\text{def}}N(\Omega)$  (in au multiplied by  $10^3$ ) and  $\Delta_{\text{def}}E(\Omega)$  (in italics and expressed in  $\text{kJ mol}^{-1}$ ) values for **ME1**.

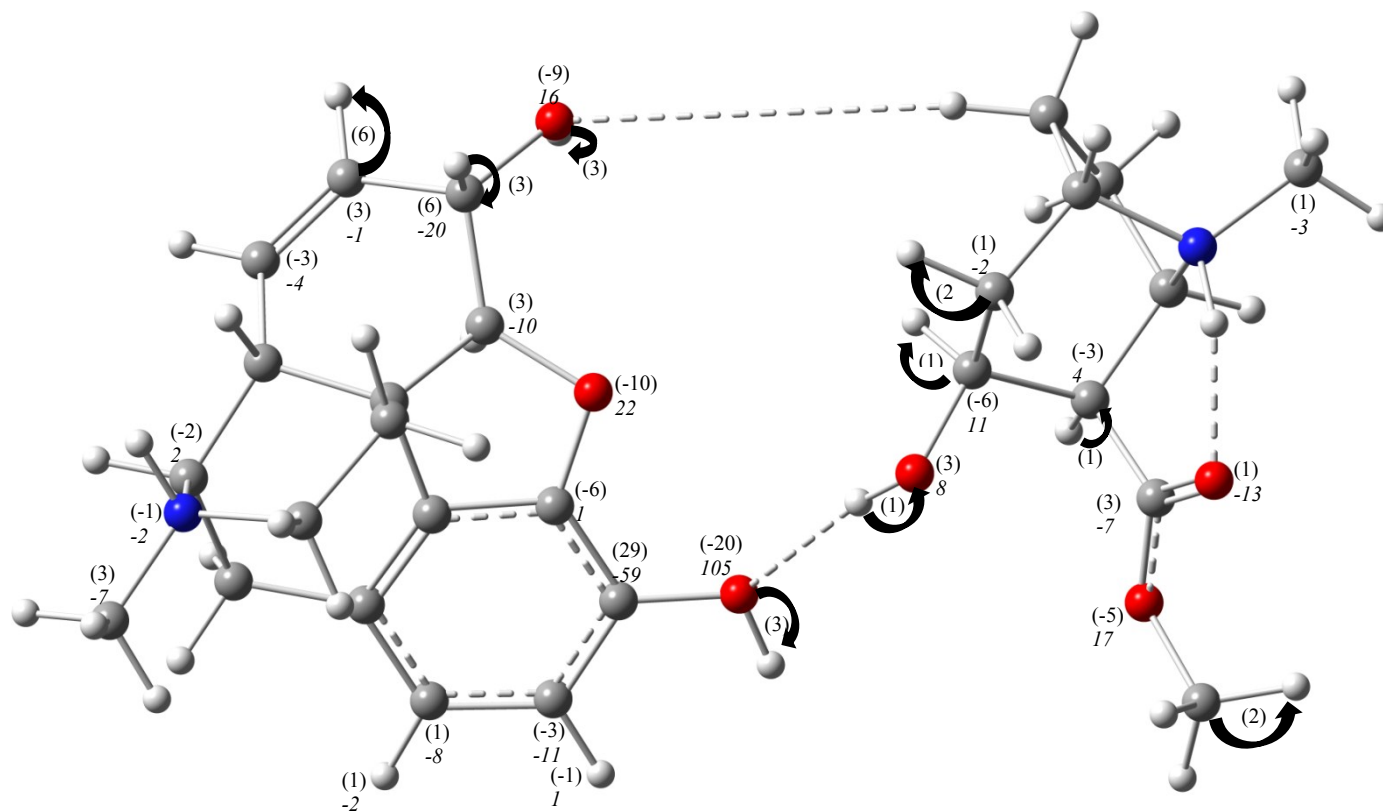

**Supplementary Figure 8** Principal  $\Delta_{\text{def}}N(\Omega)$  (in au multiplied by  $10^3$ ) and  $\Delta_{\text{def}}E(\Omega)$  (in italics and expressed in  $\text{kJ mol}^{-1}$ ) values for ME2.

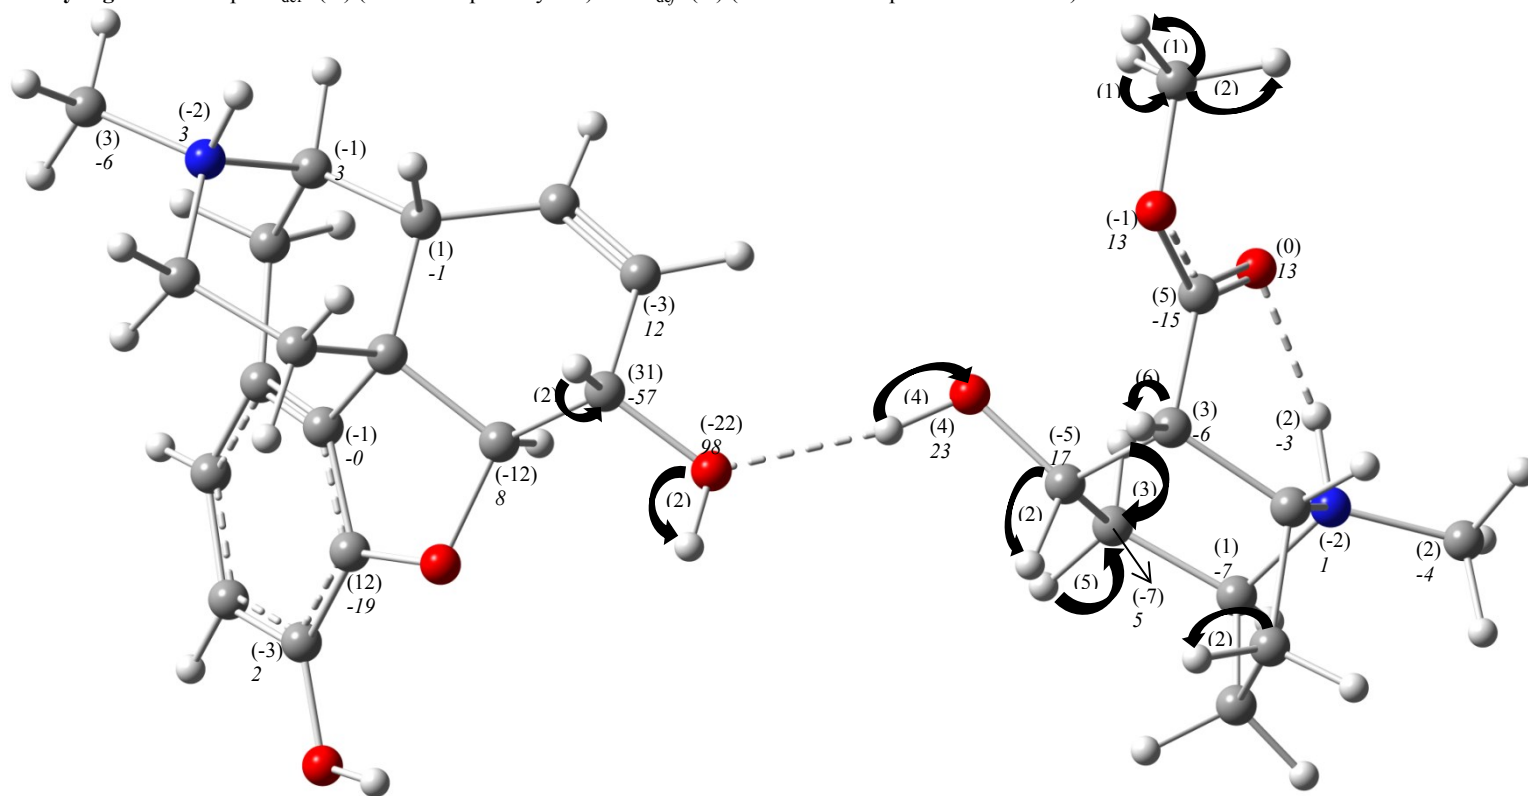

**Supplementary Figure 9** Principal  $\Delta_{\text{def}}N(\Omega)$  (in au multiplied by  $10^3$ ) and  $\Delta_{\text{def}}E(\Omega)$  (in italics and expressed in  $\text{kJ mol}^{-1}$ ) values for **ME3**.

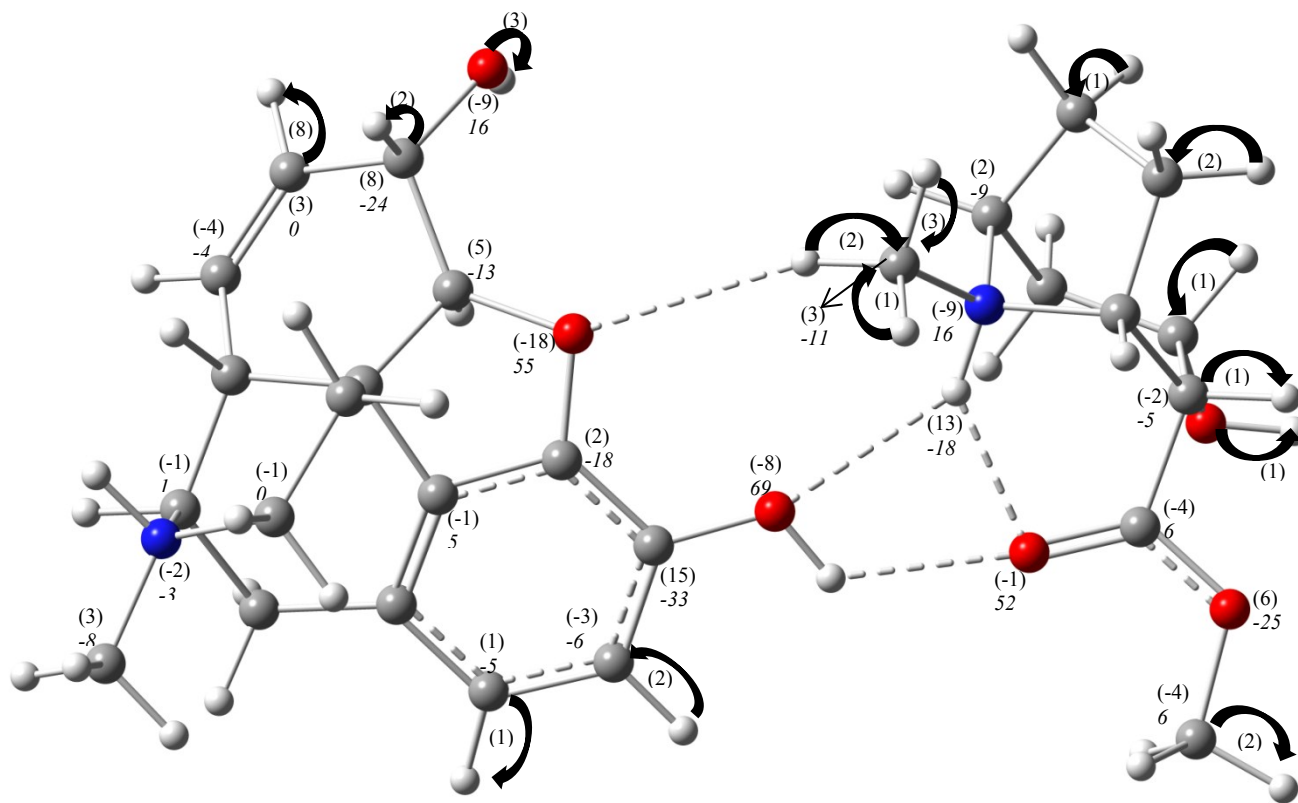



**Supplementary Figure 10** Principal  $\Delta_{\text{def}}N(\Omega)$  (in au multiplied by  $10^3$ ) and  $\Delta_{\text{def}}E(\Omega)$  (in italics and expressed in  $\text{kJ mol}^{-1}$ ) values for ME4.

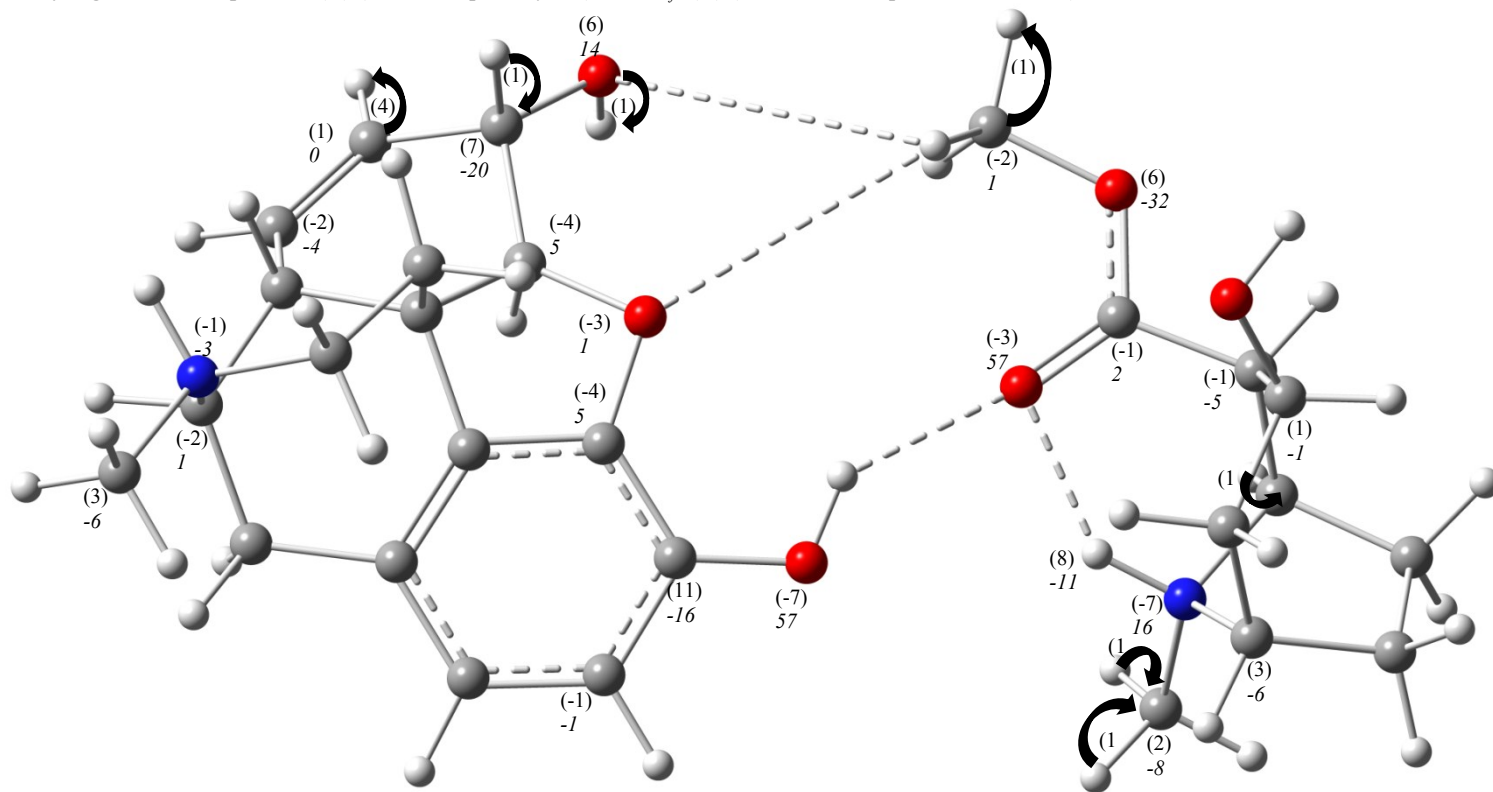

**Supplementary Figure 11** Principal  $\Delta_{\text{def}}N(\Omega)$  (in au multiplied by  $10^3$ ) and  $\Delta_{\text{def}}E(\Omega)$  (in italics and expressed in  $\text{kJ mol}^{-1}$ ) values for **ME5**.

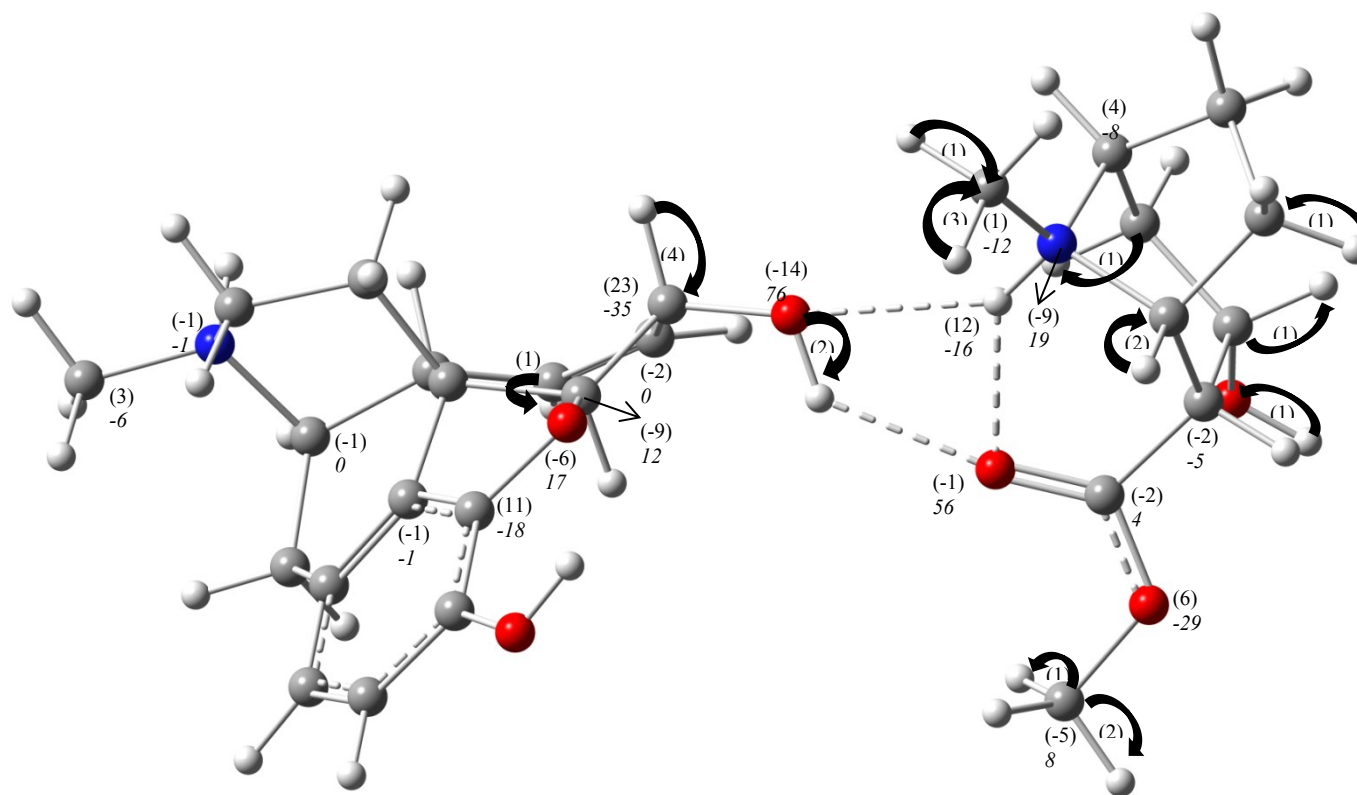

**Supplementary Figure 12** Principal  $-\Delta_{\text{BSSSE}}N(\Omega)$  (in au and multiplied by  $10^3$ ) and  $-\Delta_{\text{BSSSE}}E(\Omega)$  (in italics and expressed in  $\text{kJ mol}^{-1}$ ) values for **HE1**. Reddish colour atoms indicate atoms where  $\Delta_c^{\text{CP}}E(\Omega) > \Delta_c E(\Omega)$ , while greenish ones are the atoms extra-stabilized according to CP-uncorrected atomic energies, that is:  $\Delta_c^{\text{CP}}E(\Omega) < \Delta_c E(\Omega)$ .

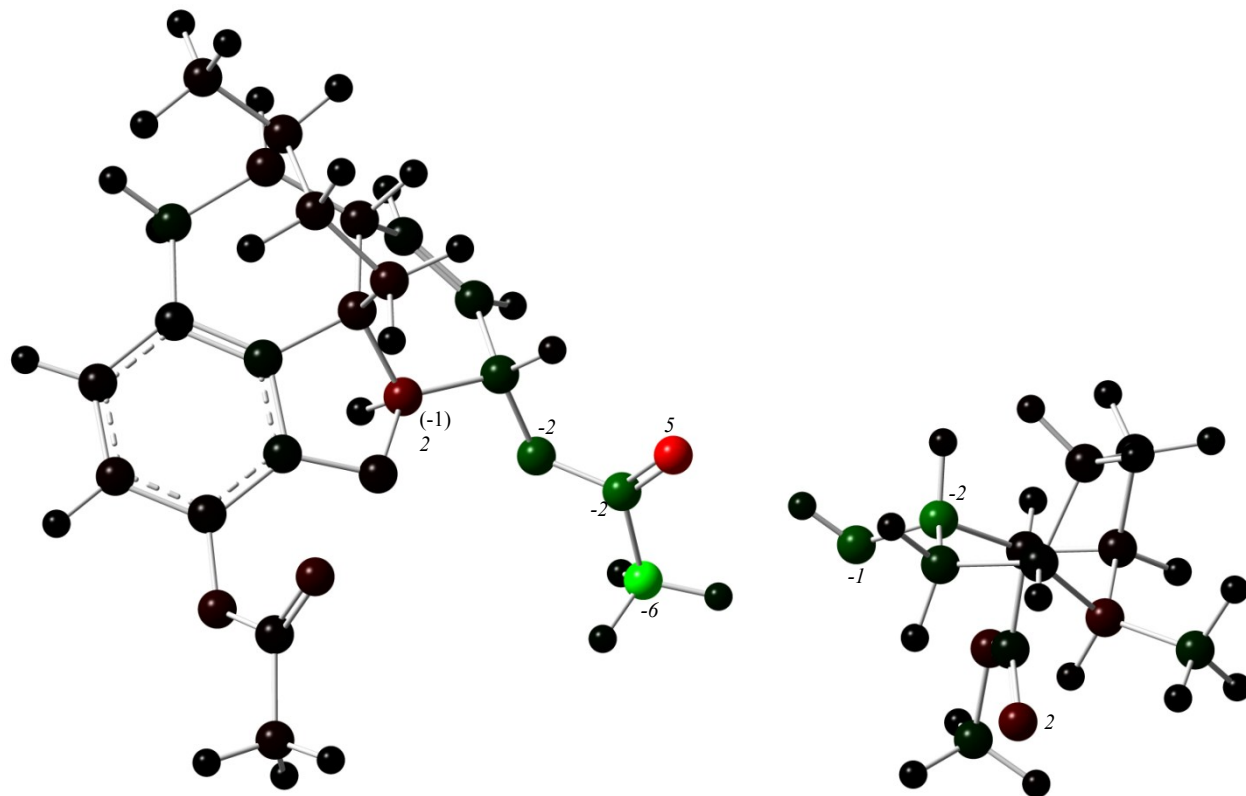

**Supplementary Figure 13** Principal  $-\Delta_{\text{BSSSE}}N(\Omega)$  (in au and multiplied by  $10^3$ ) and  $-\Delta_{\text{BSSSE}}E(\Omega)$  (in italics and expressed in  $\text{kJ mol}^{-1}$ ) values for **HE2**. Reddish colour atoms indicate atoms where  $\Delta_c^{\text{CP}}E(\Omega) > \Delta_c E(\Omega)$ , while greenish ones are the atoms extra-stabilized according to CP-uncorrected atomic energies, that is:  $\Delta_c^{\text{CP}}E(\Omega) < \Delta_c E(\Omega)$ .

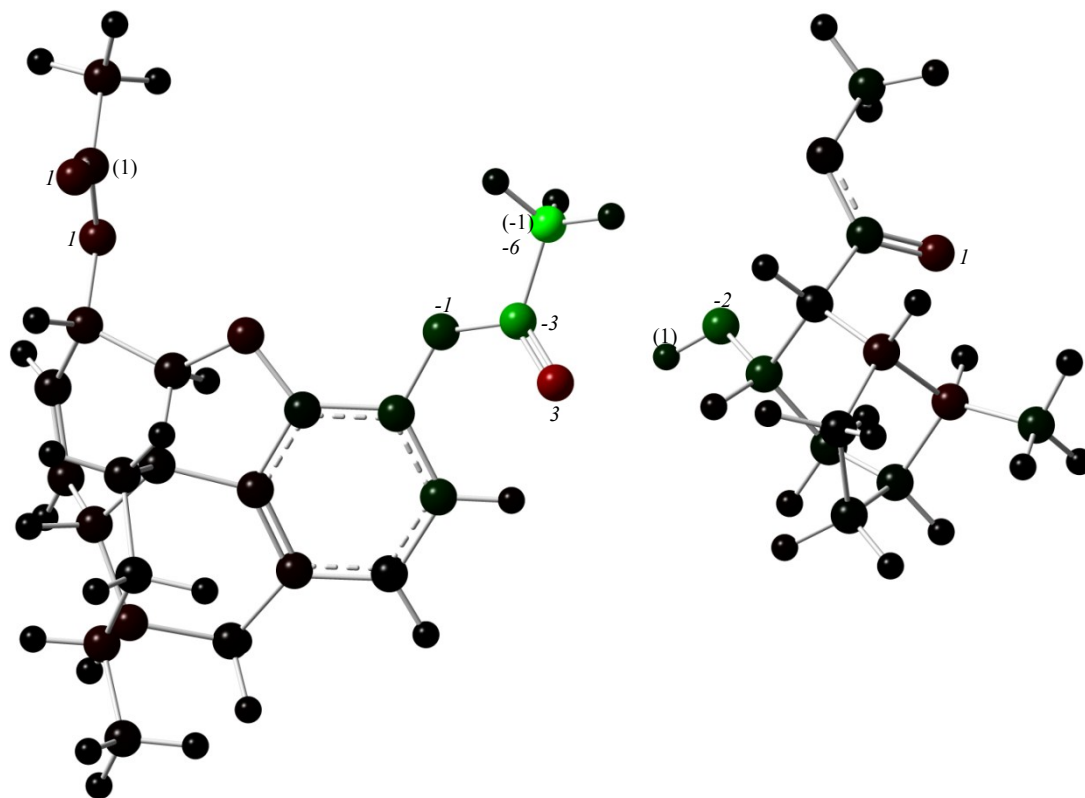

**Supplementary Figure 14** Principal  $-\Delta_{\text{BSSSE}}N(\Omega)$  (in au and multiplied by  $10^3$ ) and  $-\Delta_{\text{BSSSE}}E(\Omega)$  (in italics and expressed in  $\text{kJ mol}^{-1}$ ) values for **MC1**. Reddish colour atoms indicate atoms where  $\Delta_c^{\text{CP}}E(\Omega) > \Delta_c E(\Omega)$ , while greenish ones are the atoms extra-stabilized according to CP-uncorrected atomic energies, that is:  $\Delta_c^{\text{CP}}E(\Omega) < \Delta_c E(\Omega)$ .

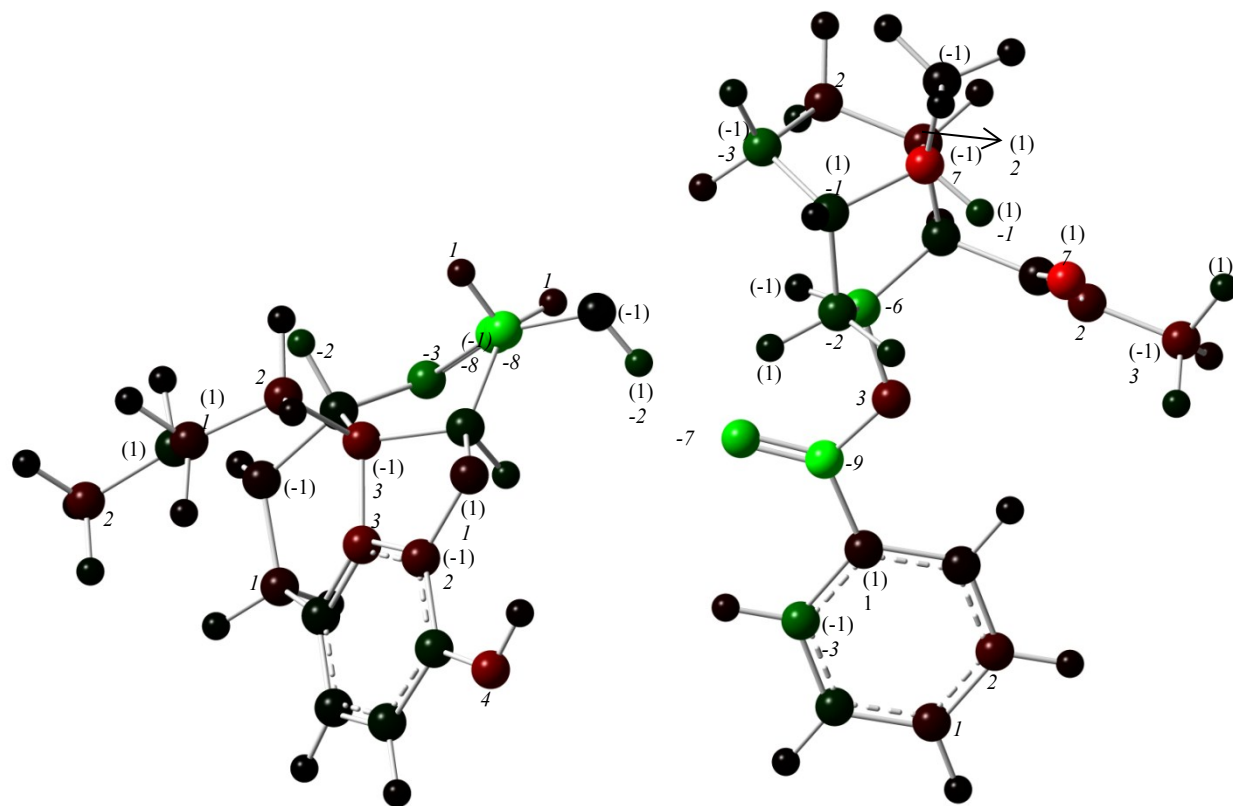

**Supplementary Figure 15** Principal  $-\Delta_{\text{BSSSE}}N(\Omega)$  (in au and multiplied by  $10^3$ ) and  $-\Delta_{\text{BSSSE}}E(\Omega)$  (in italics and expressed in  $\text{kJ mol}^{-1}$ ) values for **MC2**. Reddish colour atoms indicate atoms where  $\Delta_{\text{c}}^{\text{CP}}E(\Omega) > \Delta_{\text{c}}E(\Omega)$ , while greenish ones are the atoms extra-stabilized according to CP-uncorrected atomic energies, that is:  $\Delta_{\text{c}}^{\text{CP}}E(\Omega) < \Delta_{\text{c}}E(\Omega)$ .

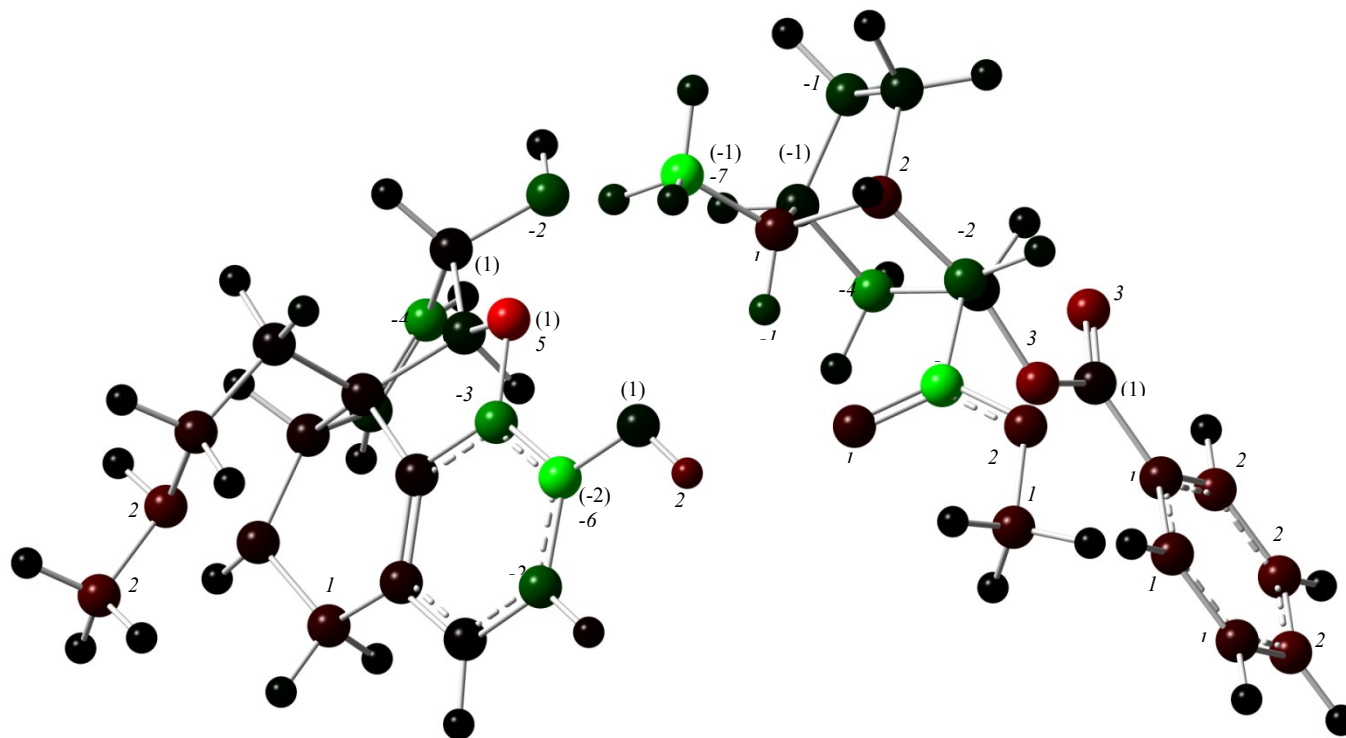



**Supplementary Figure 17** Principal  $-\Delta_{\text{BSSE}}N(\Omega)$  (in au and multiplied by  $10^3$ ) and  $-\Delta_{\text{BSSE}}E(\Omega)$  (in italics and expressed in  $\text{kJ mol}^{-1}$ ) values for **MC4**. Reddish colour atoms indicate atoms where  $\Delta_c^{\text{CP}}E(\Omega) > \Delta_c E(\Omega)$ , while greenish ones are the atoms extra-stabilized according to CP-uncorrected atomic energies, that is:  $\Delta_c^{\text{CP}}E(\Omega) < \Delta_c E(\Omega)$ .

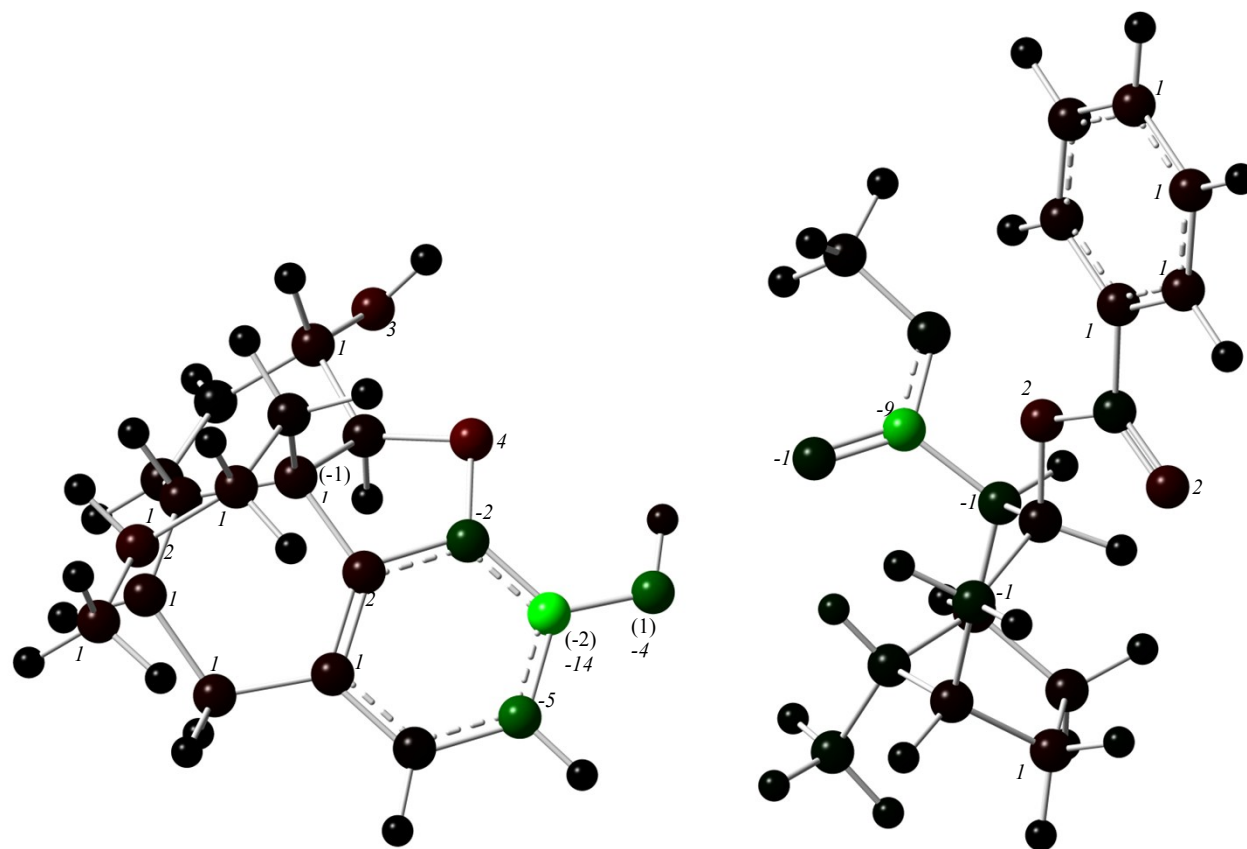



**Supplementary Figure 18** Principal  $-\Delta_{\text{BSSE}}N(\Omega)$  (in au and multiplied by  $10^3$ ) and  $-\Delta_{\text{BSSE}}E(\Omega)$  (in italics and expressed in  $\text{kJ mol}^{-1}$ ) values for **ME1**. Reddish colour atoms indicate atoms where  $\Delta_c^{\text{CP}}E(\Omega) > \Delta_c E(\Omega)$ , while greenish ones are the atoms extra-stabilized according to CP-uncorrected atomic energies, that is:  $\Delta_c^{\text{CP}}E(\Omega) < \Delta_c E(\Omega)$ .

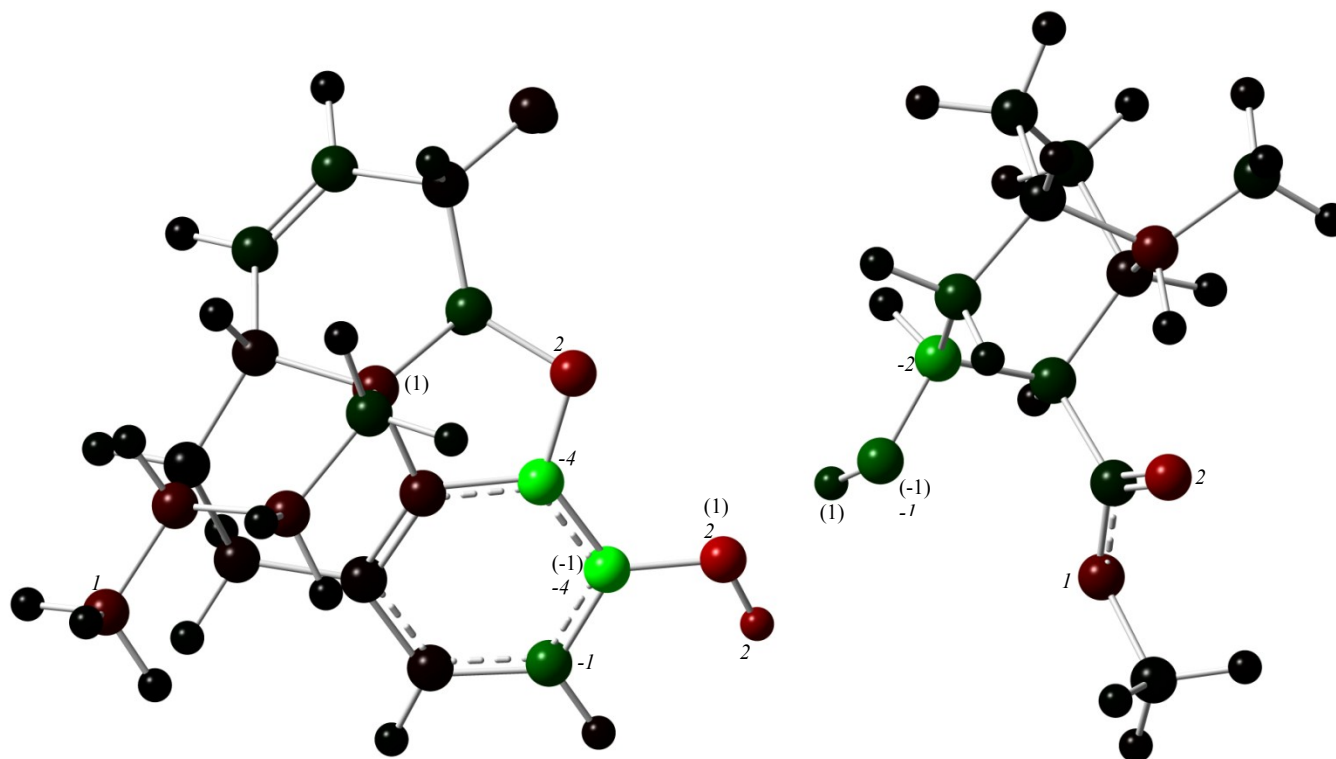

**Supplementary Figure 19** Principal  $-\Delta_{\text{BSSSE}}N(\Omega)$  (in au and multiplied by  $10^3$ ) and  $-\Delta_{\text{BSSSE}}E(\Omega)$  (in italics and expressed in  $\text{kJ mol}^{-1}$ ) values for **ME2**. Reddish colour atoms indicate atoms where  $\Delta_c^{\text{CP}}E(\Omega) > \Delta_c E(\Omega)$ , while greenish ones are the atoms extra-stabilized according to CP-uncorrected atomic energies, that is:  $\Delta_c^{\text{CP}}E(\Omega) < \Delta_c E(\Omega)$ .

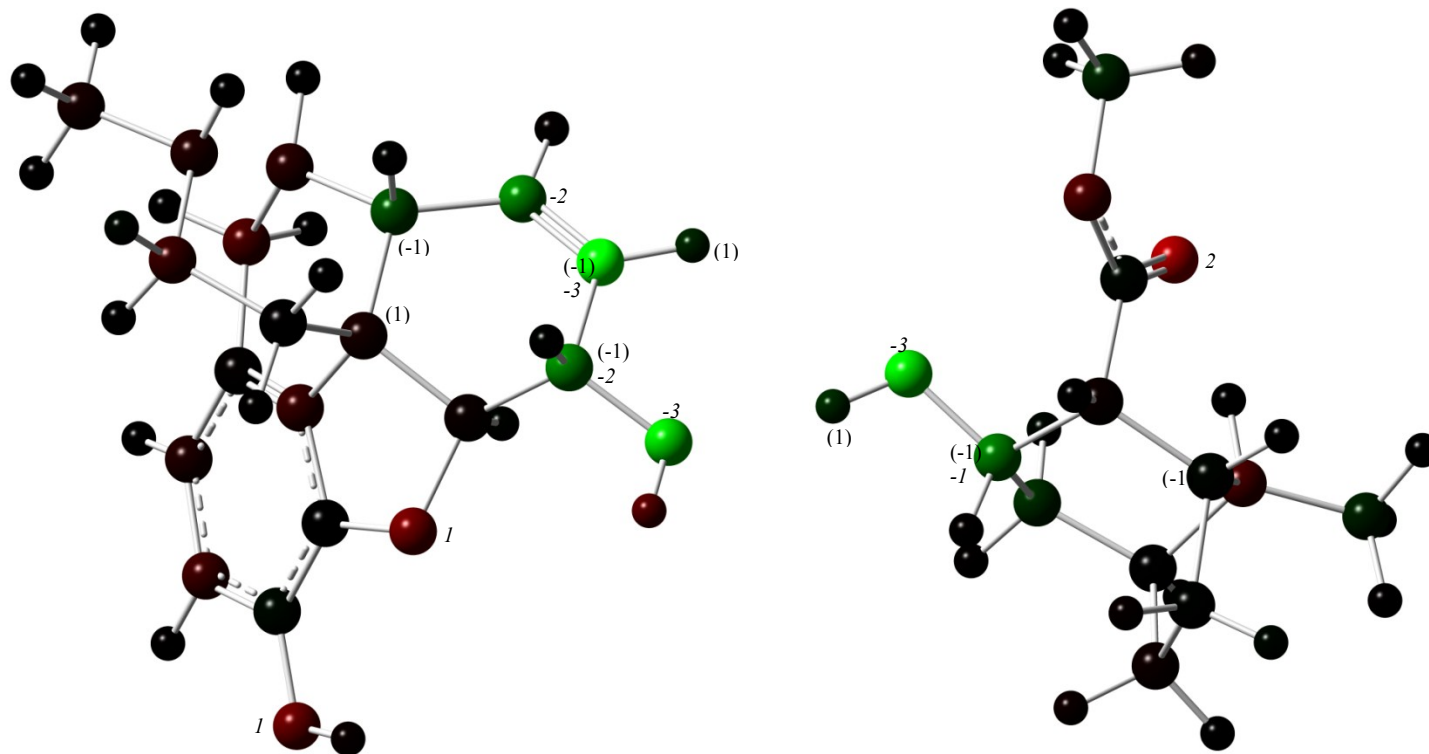

**Supplementary Figure 20** Principal  $-\Delta_{\text{BSSSE}}N(\Omega)$  (in au and multiplied by  $10^3$ ) and  $-\Delta_{\text{BSSSE}}E(\Omega)$  (in italics and expressed in  $\text{kJ mol}^{-1}$ ) values for **ME3**. Reddish colour atoms indicate atoms where  $\Delta_c^{\text{CP}}E(\Omega) > \Delta_c E(\Omega)$ , while greenish ones are the atoms extra-stabilized according to CP-uncorrected atomic energies, that is:  $\Delta_c^{\text{CP}}E(\Omega) < \Delta_c E(\Omega)$ .

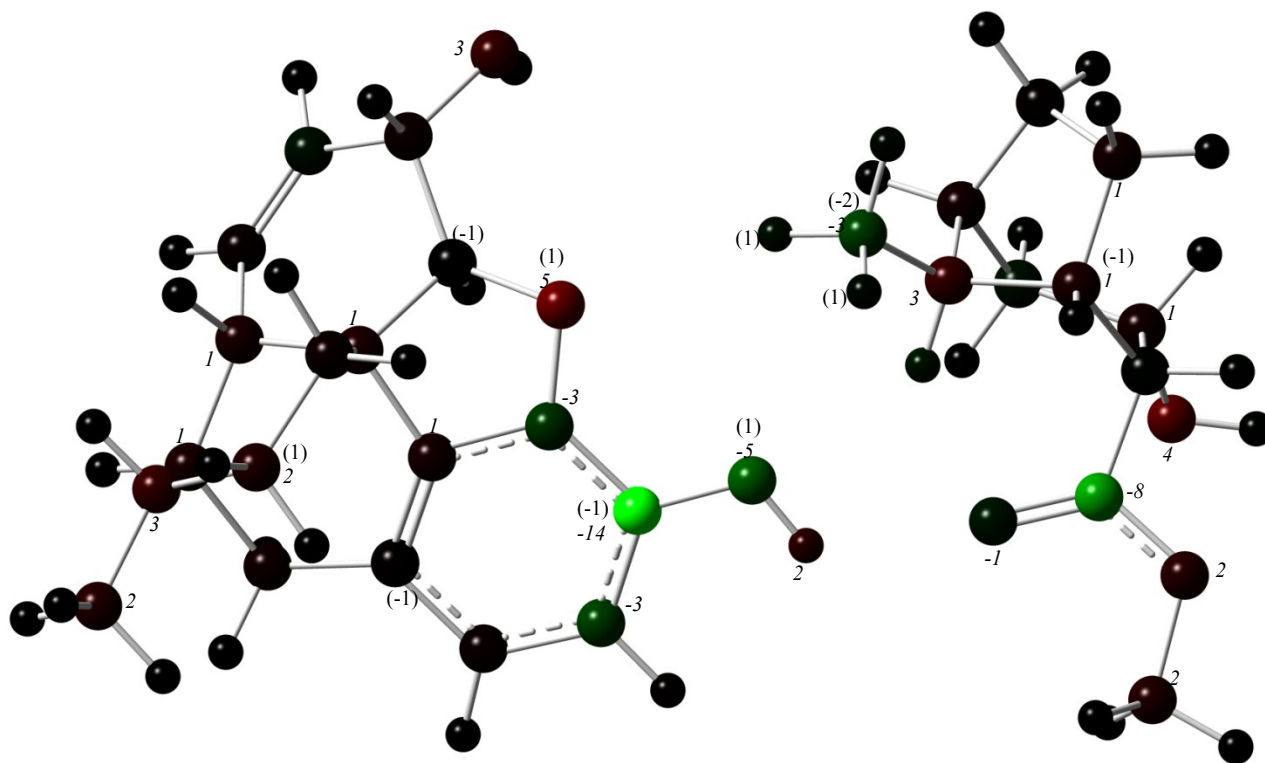

**Supplementary Figure 21** Principal  $-\Delta_{\text{BSSSE}}N(\Omega)$  (in au and multiplied by  $10^3$ ) and  $-\Delta_{\text{BSSSE}}E(\Omega)$  (in italics and expressed in  $\text{kJ mol}^{-1}$ ) values for **ME4**. Reddish colour atoms indicate atoms where  $\Delta_{\text{c}}^{\text{CP}}E(\Omega) > \Delta_{\text{c}}E(\Omega)$ , while greenish ones are the atoms extra-stabilized according to CP-uncorrected atomic energies, that is:  $\Delta_{\text{c}}^{\text{CP}}E(\Omega) < \Delta_{\text{c}}E(\Omega)$ .

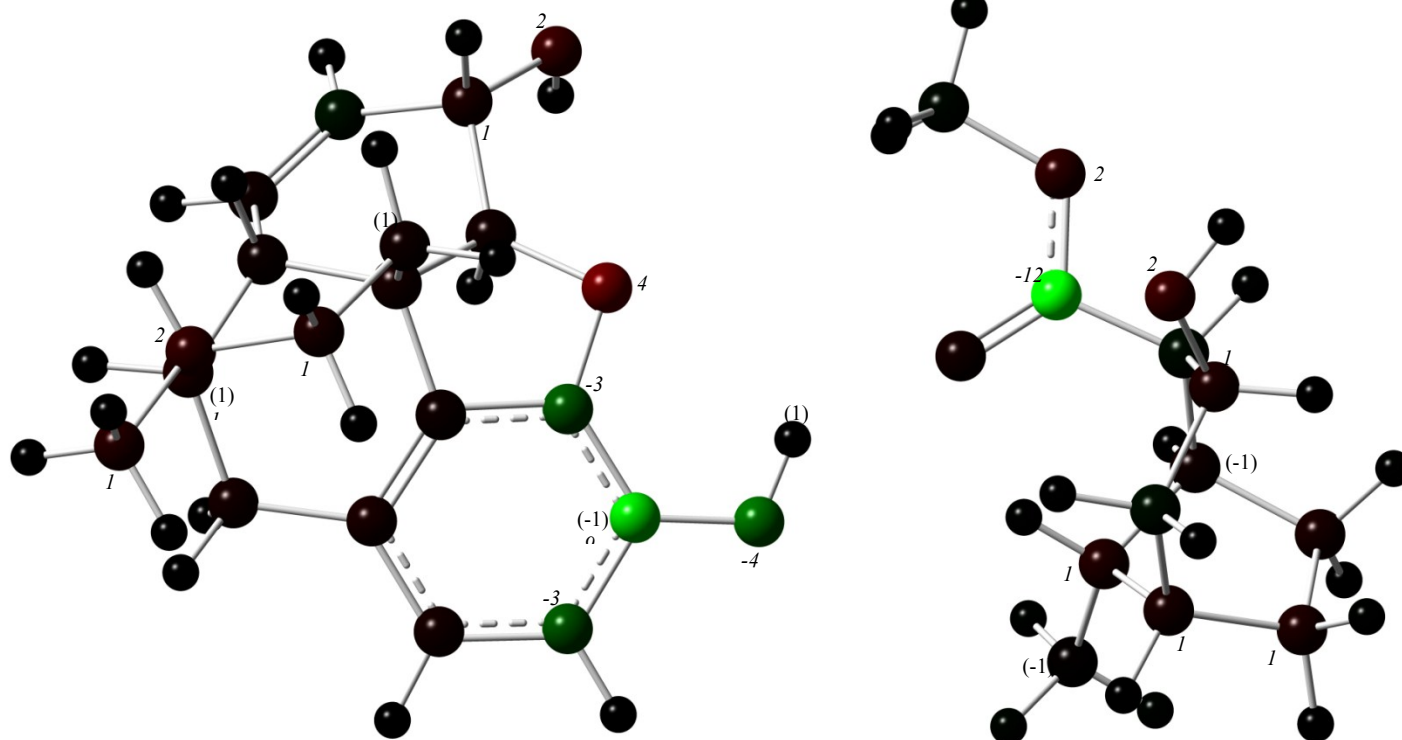

**Supplementary Figure 22** Principal  $-\Delta_{\text{BSSSE}}N(\Omega)$  (in au and multiplied by  $10^3$ ) and  $-\Delta_{\text{BSSSE}}E(\Omega)$  (in italics and expressed in  $\text{kJ mol}^{-1}$ ) values for **ME5**. Reddish colour atoms indicate atoms where  $\Delta_c^{\text{CP}}E(\Omega) > \Delta_c E(\Omega)$ , while greenish ones are the atoms extra-stabilized according to CP-uncorrected atomic energies, that is:  $\Delta_c^{\text{CP}}E(\Omega) < \Delta_c E(\Omega)$ .

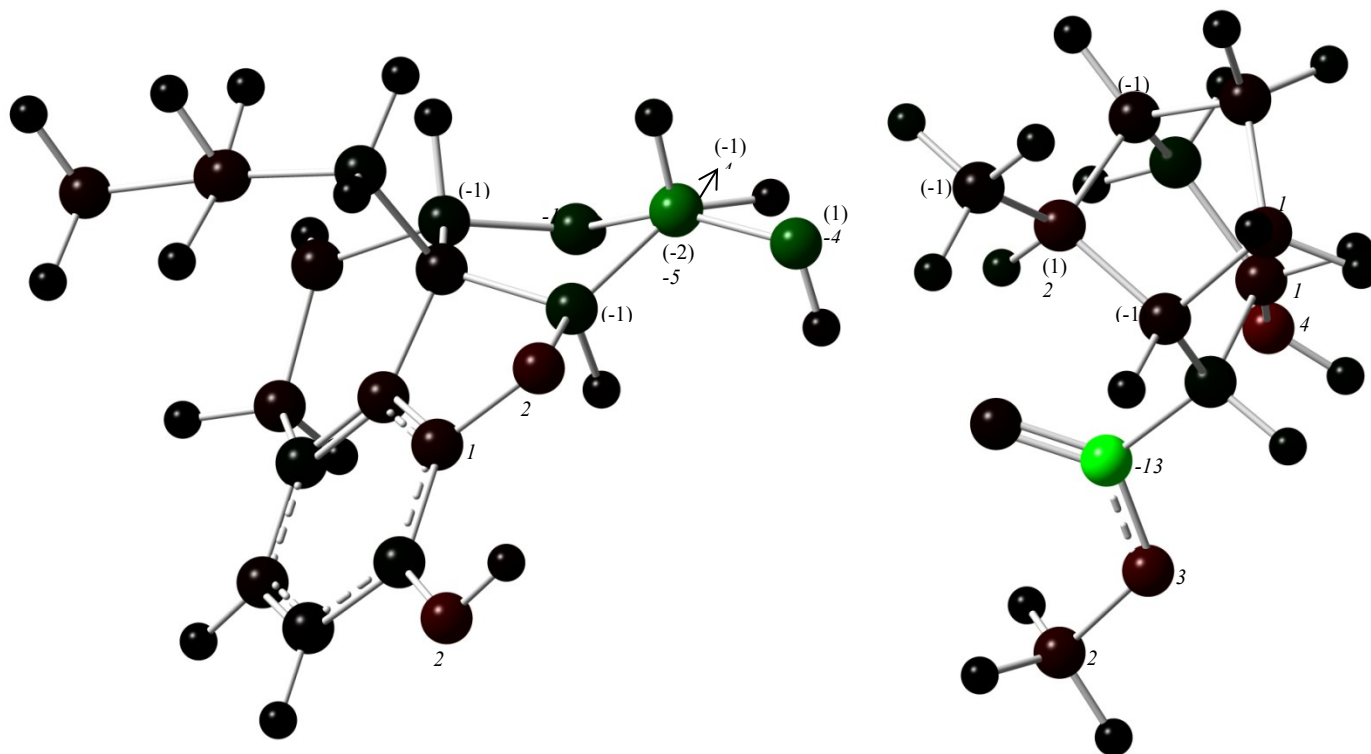

**Supplementary Figure 23** Most significant  $\Delta_b^{CPN}(\Omega)$  (in boldface and in au and multiplied by  $10^3$ ),  $\Delta_b^{CPE}(\Omega)$  values (in italics and expressed in  $\text{kJ mol}^{-1}$ ),  $\Delta_b^{CPM}(\Omega)$  (in au multiplied by  $10^3$ ), and  $\Delta_b^{CPV}(\Omega)$  (in parenthesis and in au) in **HE1**. See supplementary material for corresponding values for the remaining complexes studied here in. Summation of these atomic variations (excluding  $\Delta_b^{CPM}(\Omega)$ ) are shown for whole monomers (M), atoms and groups whose variation is not detailed ( $M'$ ), and hydrogens not detailed or included in the methyl group attached to C3'' (H( $M'$ )). The arrow indicates the total electron density transference between both monomers (in au multiplied by  $10^3$ ).

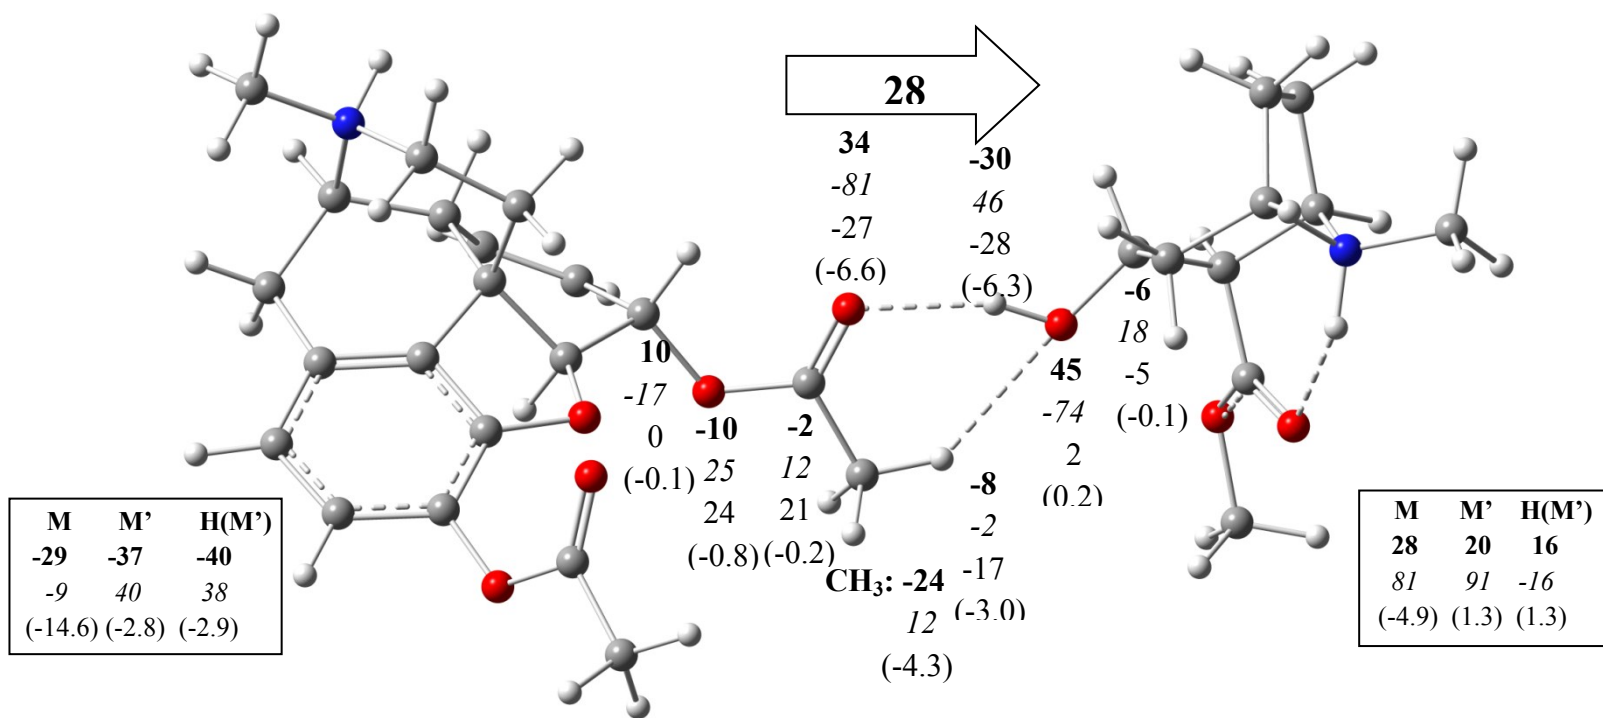

**Supplementary Figure 24** Most significant  $\Delta_b^{CPN}(\Omega)$  (in boldface and in au and multiplied by  $10^3$ ) and  $\Delta_b^{CPE}(\Omega)$  values (in italics and expressed in  $\text{kJ mol}^{-1}$ ) in **HE2**. Summation of these atomic variations are shown for whole monomers (M), atoms and groups whose variation is not detailed (M'), and hydrogens not detailed or included in the methyl group attached to C2' (H(M')). The arrow indicates the total electron density transference between both monomers (in au multiplied by  $10^3$ ).

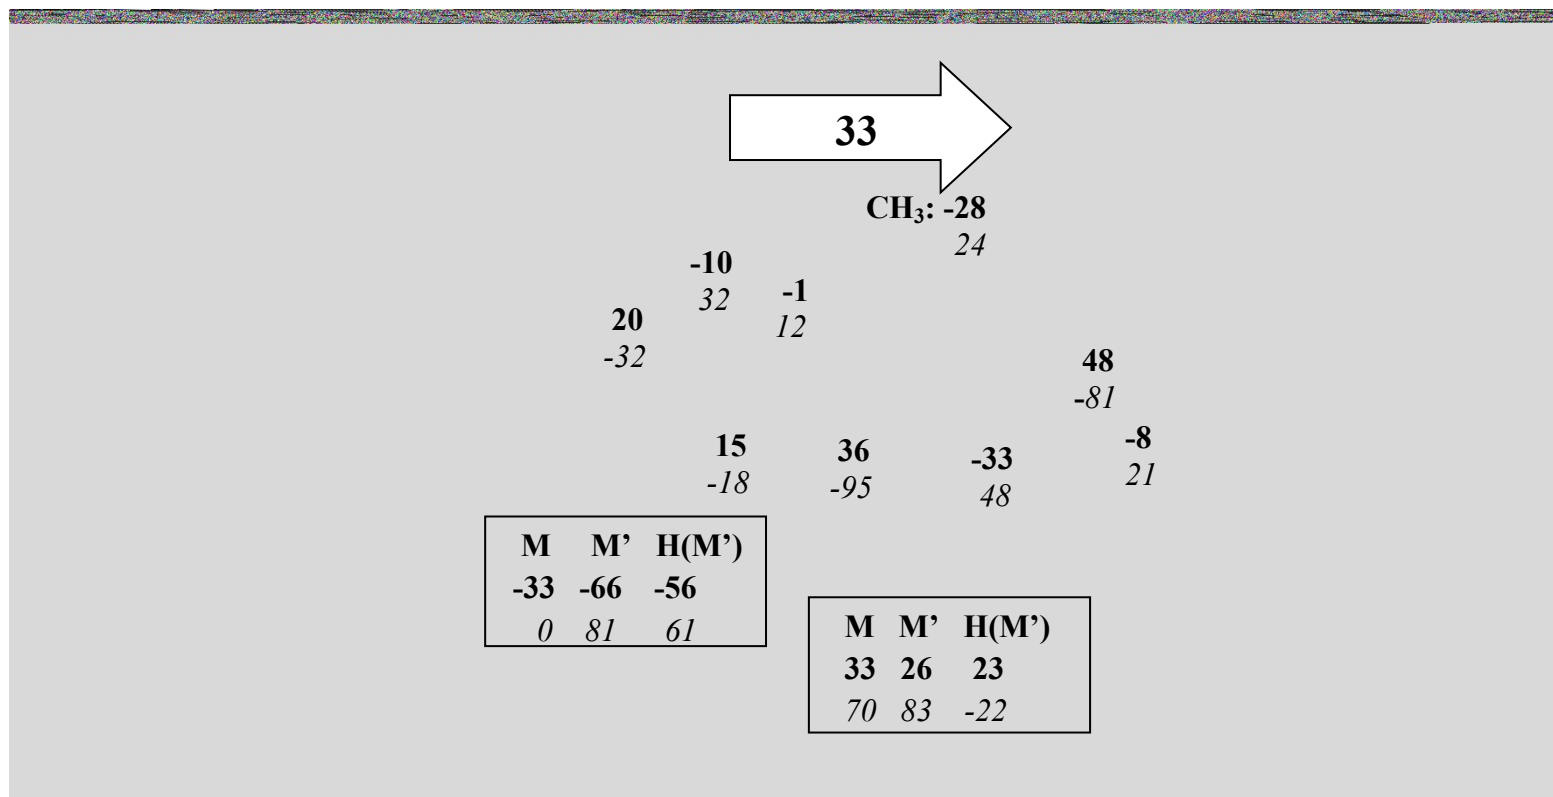

**Supplementary Figure 25** Most significant  $\Delta_b^{CPN}(\Omega)$  (in boldface and in au and multiplied by  $10^3$ ) and  $\Delta_b^{CPE}(\Omega)$  values (in italics and expressed in  $\text{kJ mol}^{-1}$ ) in **MC1**. Summation of these atomic variations are shown for whole monomers (M), atoms and groups whose variation is not detailed (M'), and hydrogens not detailed (H(M')). The arrow indicates the total electron density transference between both monomers (in au multiplied by  $10^3$ ).

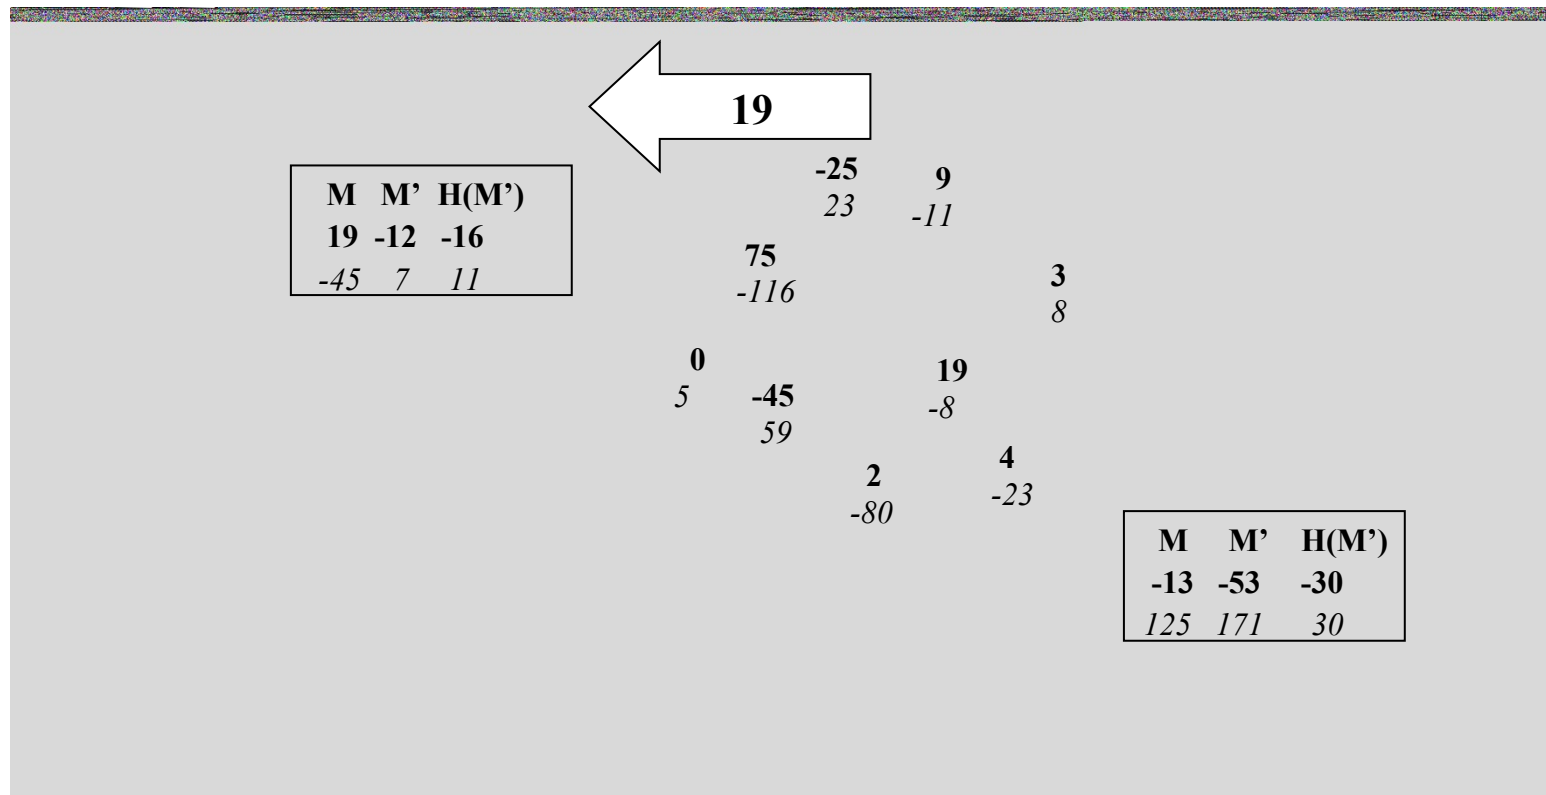



**Supplementary Figure 26** Most significant  $\Delta_b^{CPN}(\Omega)$  (in boldface and in au and multiplied by  $10^3$ ) and  $\Delta_b^{CPE}(\Omega)$  values (in italics and expressed in  $\text{kJ mol}^{-1}$ ) in **MC2**. Summation of these atomic variations are shown for whole monomers (M), atoms and groups whose variation is not detailed (M'), and hydrogens not detailed (H(M')). The arrow indicates the total electron density transference between both monomers (in au multiplied by  $10^3$ ).

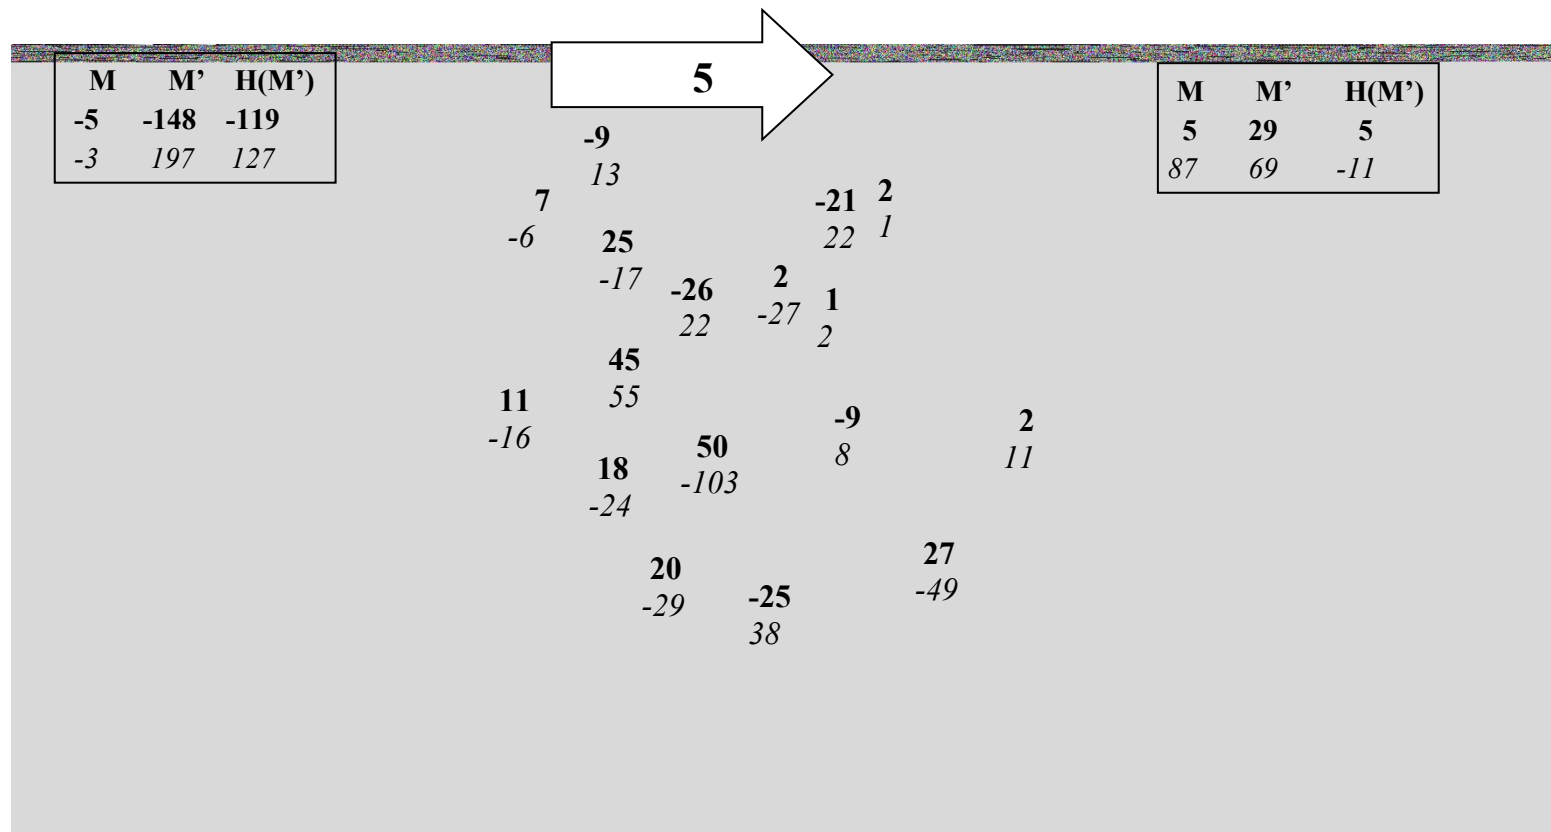

**Supplementary Figure 27** Most significant  $\Delta_b^{CPN}(\Omega)$  (in boldface and in au and multiplied by  $10^3$ ) and  $\Delta_b^{CPE}(\Omega)$  values (in italics and expressed in  $\text{kJ mol}^{-1}$ ) in **MC3**. Summation of these atomic variations are shown for whole monomers (M), atoms and groups whose variation is not detailed ( $M'$ ), and hydrogens not detailed ( $H(M')$ ). The arrow indicates the total electron density transference between both monomers (in au multiplied by  $10^3$ ).

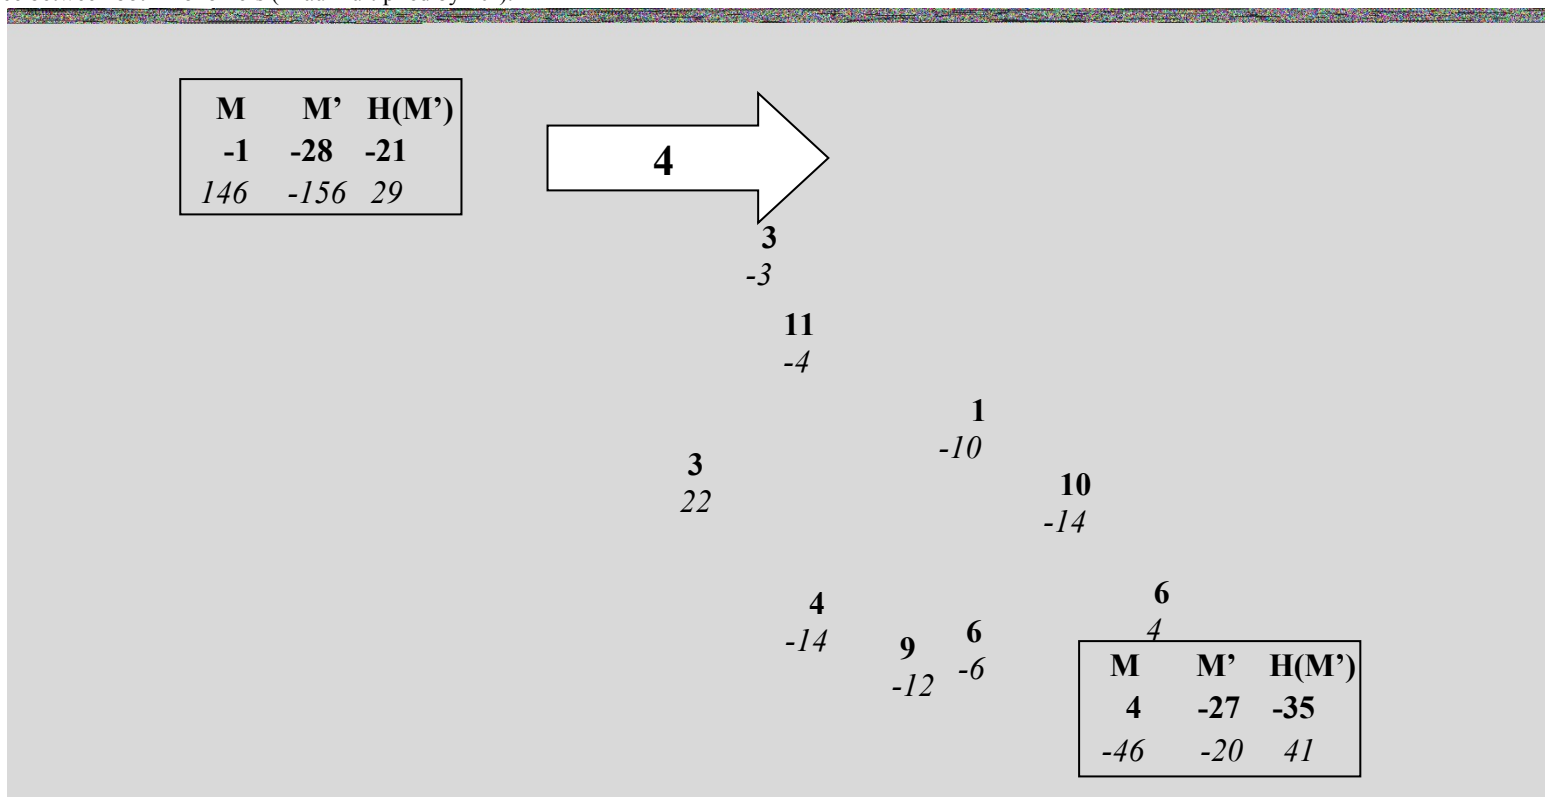

**Supplementary Figure 28** Most significant  $\Delta_b^{CPN}(\Omega)$  (in boldface and in au and multiplied by  $10^3$ ) and  $\Delta_b^{CPE}(\Omega)$  values (in italics and expressed in  $\text{kJ mol}^{-1}$ ) in **MC4**. Summation of these atomic variations are shown for whole monomers (M), atoms and groups whose variation is not detailed ( $M'$ ), and hydrogens not detailed ( $H(M')$ ). The arrow indicates the total electron density transference between both monomers (in au multiplied by  $10^3$ ).

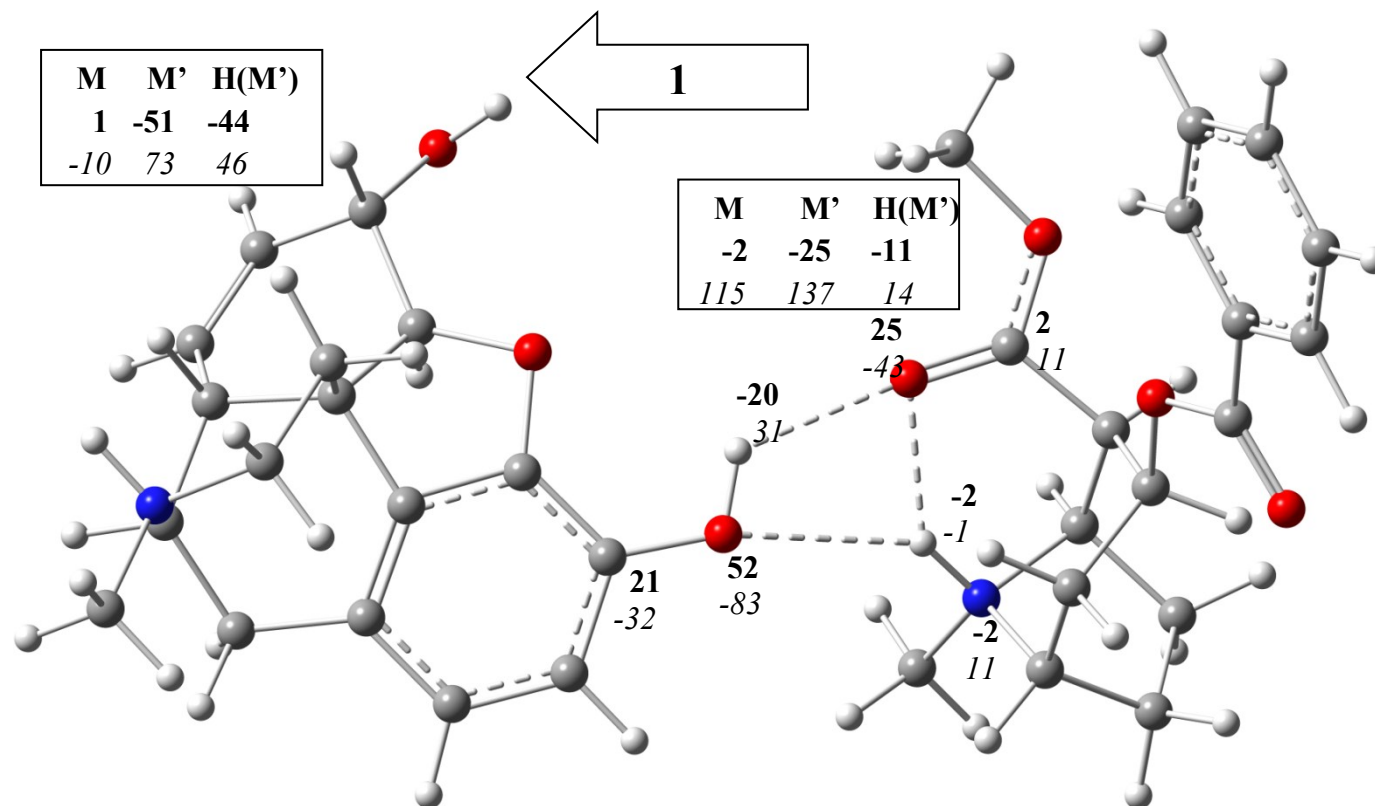

**Supplementary Figure 29** Most significant  $\Delta_b^{CPN}(\Omega)$  (in boldface and in au and multiplied by  $10^3$ ) and  $\Delta_b^{CPE}(\Omega)$  values (in italics and expressed in  $\text{kJ mol}^{-1}$ ) in **ME1**. Summation of these atomic variations are shown for whole monomers (M), atoms and groups whose variation is not detailed ( $M'$ ), and hydrogens not detailed ( $H(M')$ ). The arrow indicates the total electron density transference between both monomers (in au multiplied by  $10^3$ ).

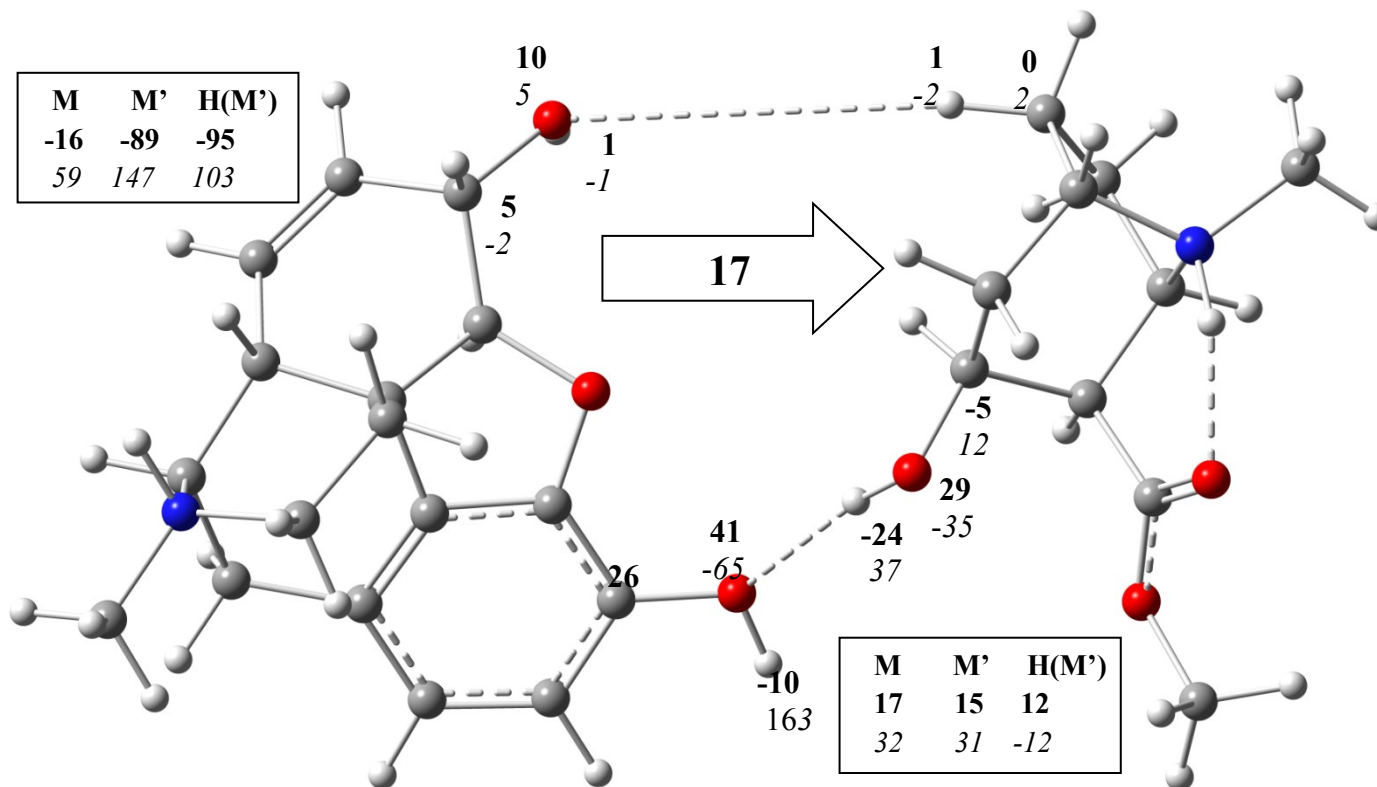

**Supplementary Figure 30** Most significant  $\Delta_b^{CP}N(\Omega)$  (in boldface and in au and multiplied by  $10^3$ ) and  $\Delta_b^{CP}E(\Omega)$  values (in italics and expressed in  $\text{kJ mol}^{-1}$ ) in **ME2**. Summation of these atomic variations are shown for whole monomers (M), atoms and groups whose variation is not detailed (M'), and hydrogens not detailed (H(M')). The arrow indicates the total electron density transference between both monomers (in au multiplied by  $10^3$ ).

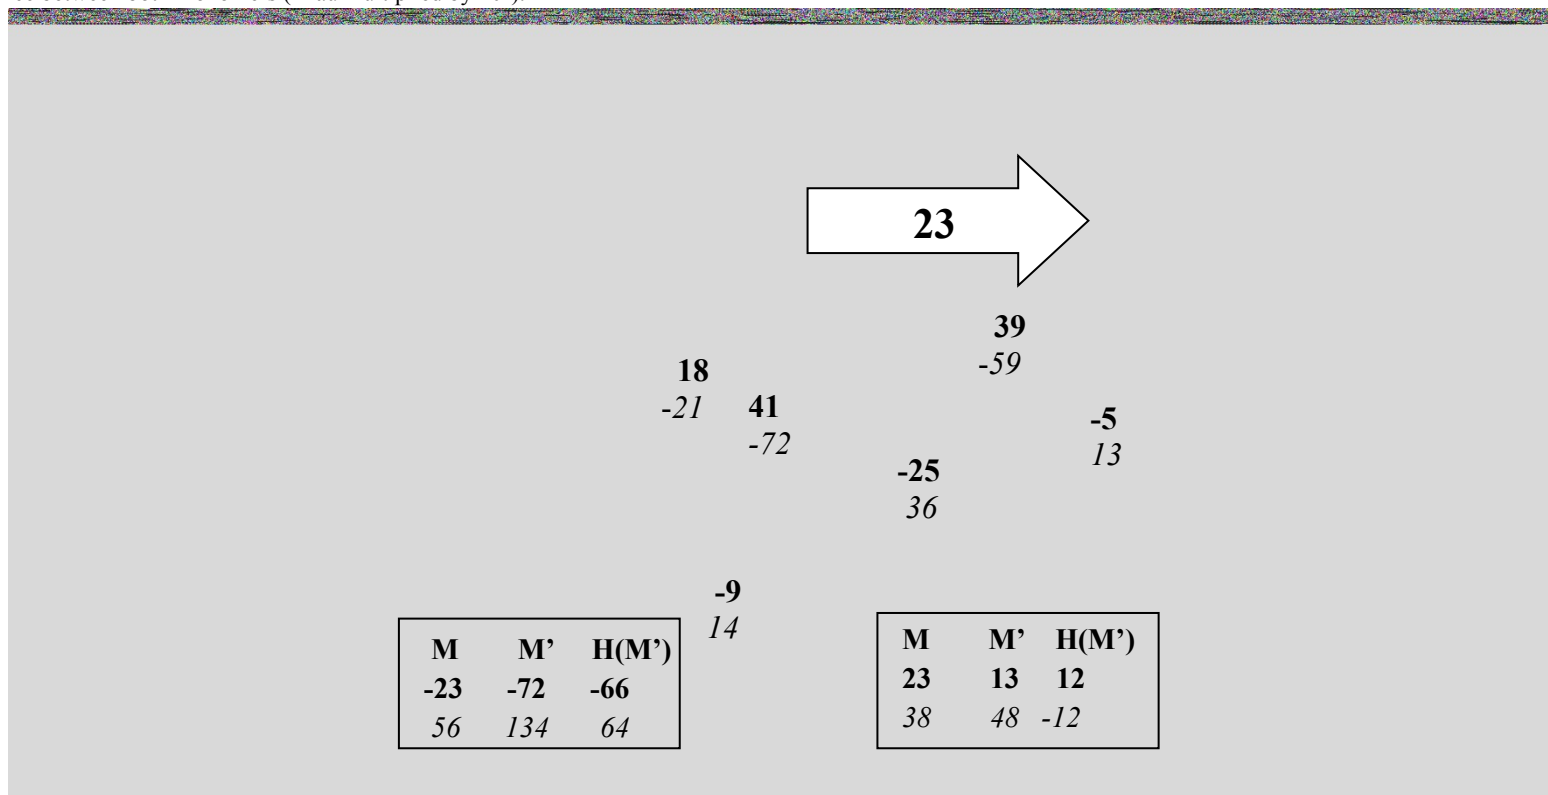

**Supplementary Figure 31** Most significant  $\Delta_b^{CPN}(\Omega)$  (in boldface and in au and multiplied by  $10^3$ ) and  $\Delta_b^{CPE}(\Omega)$  values (in italics and expressed in  $\text{kJ mol}^{-1}$ ) in **ME3**. Summation of these atomic variations are shown for whole monomers (M), atoms and groups whose variation is not detailed (M'), and hydrogens not detailed (H(M')). In this case, we do not observe total electron density transference between both monomers.

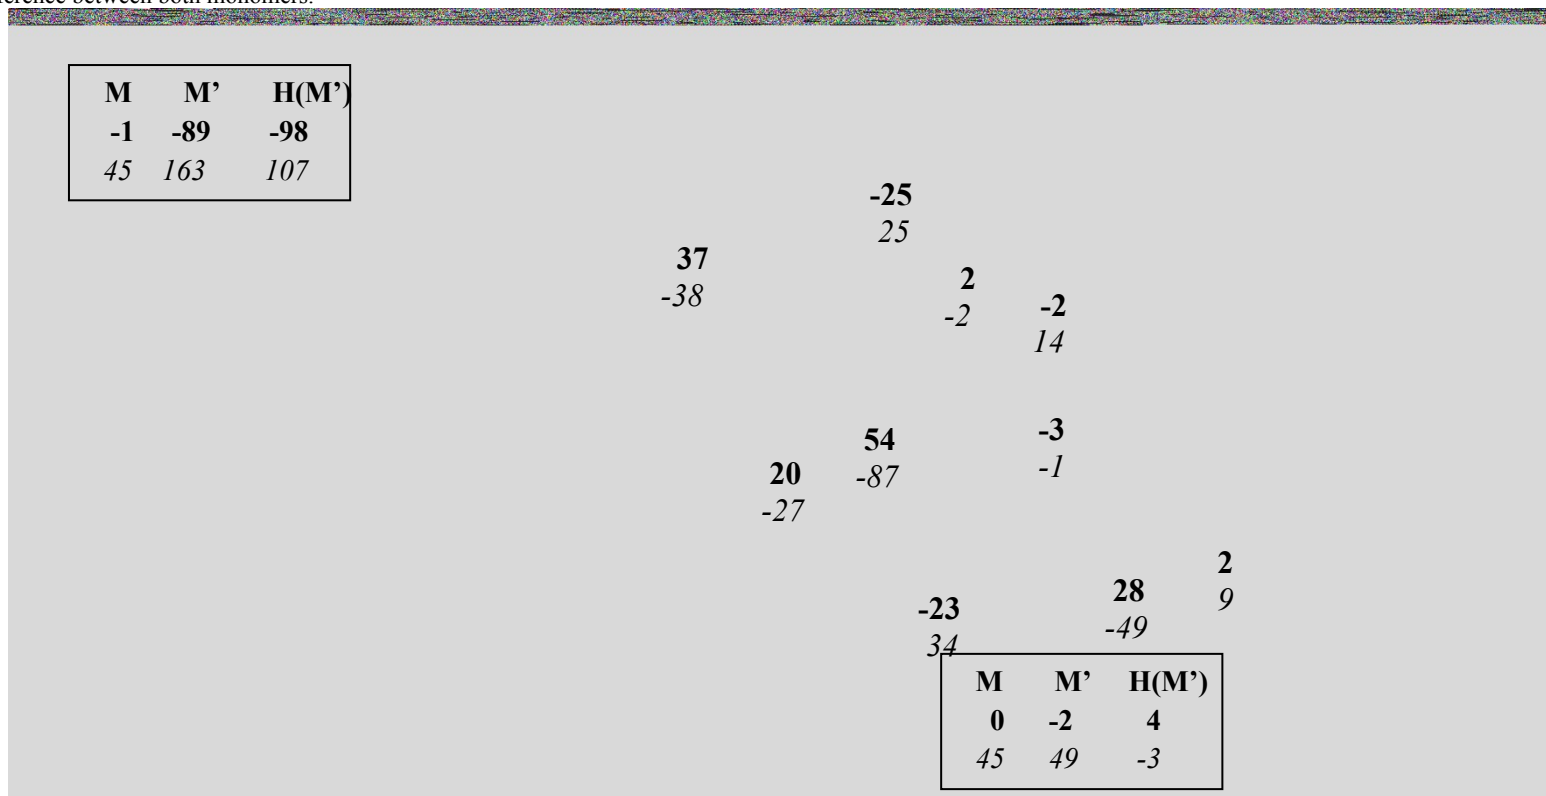

**Supplementary Figure 32** Most significant  $\Delta_b^{CP}N(\Omega)$  (in boldface and in au and multiplied by  $10^3$ ) and  $\Delta_b^{CP}E(\Omega)$  values (in italics and expressed in  $\text{kJ mol}^{-1}$ ) in **ME4**. Summation of these atomic variations are shown for whole monomers (M), atoms and groups whose variation is not detailed (M'), and hydrogens not detailed (H(M')). The arrow indicates the total electron density transference between both monomers (in au multiplied by  $10^3$ ).

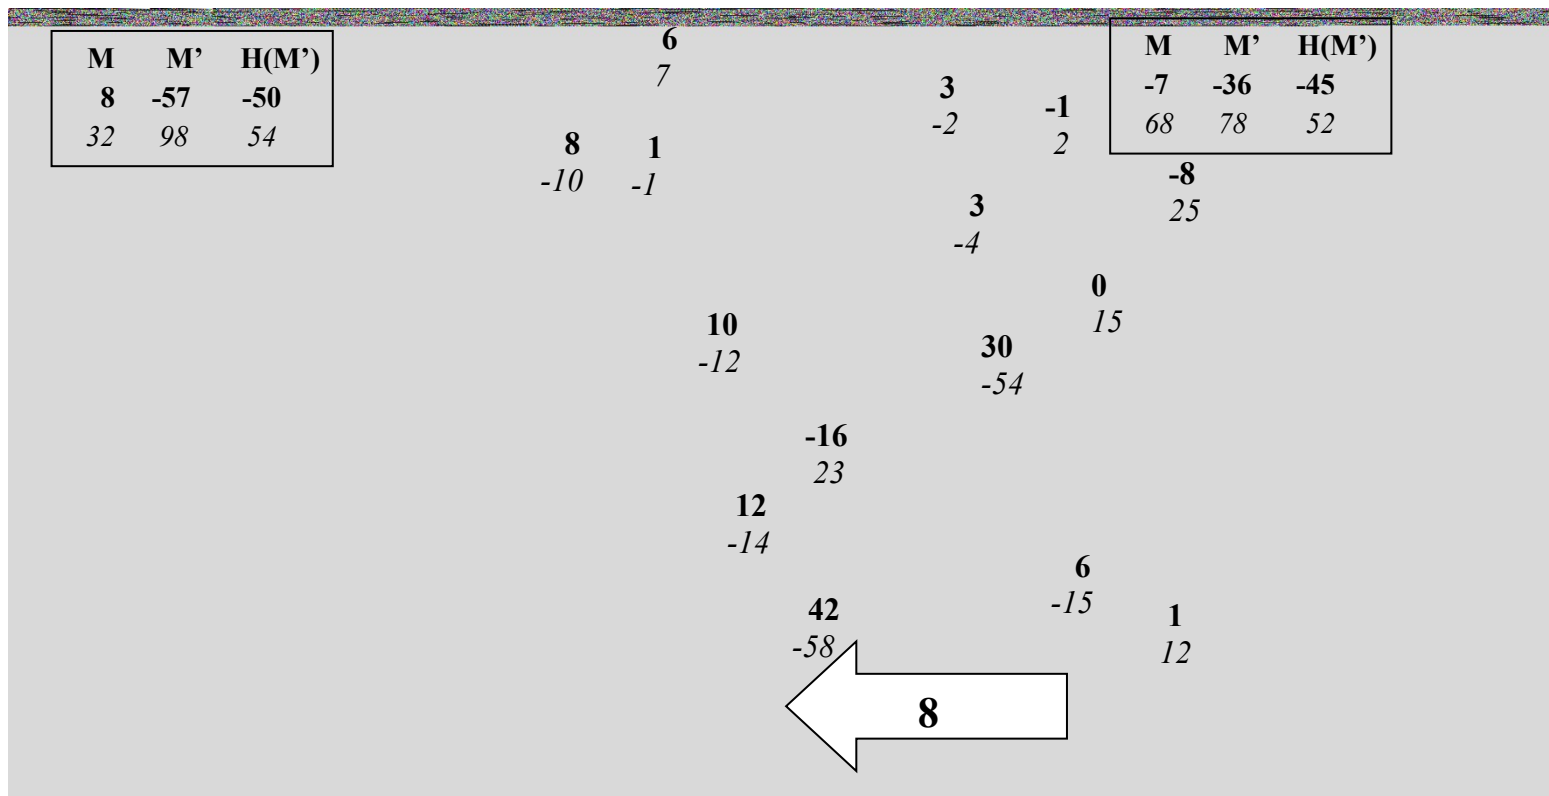

**Supplementary Figure 33** Most significant  $\Delta_b^{CPN}(\Omega)$  (in boldface and in au and multiplied by  $10^3$ ) and  $\Delta_b^{CPE}(\Omega)$  values (in italics and expressed in  $\text{kJ mol}^{-1}$ ) in **ME5**. Summation of these atomic variations are shown for whole monomers (M), atoms and groups whose variation is not detailed (M'), and hydrogens not detailed (H(M')). The arrow indicates the total electron density transference between both monomers (in au multiplied by  $10^3$ ).

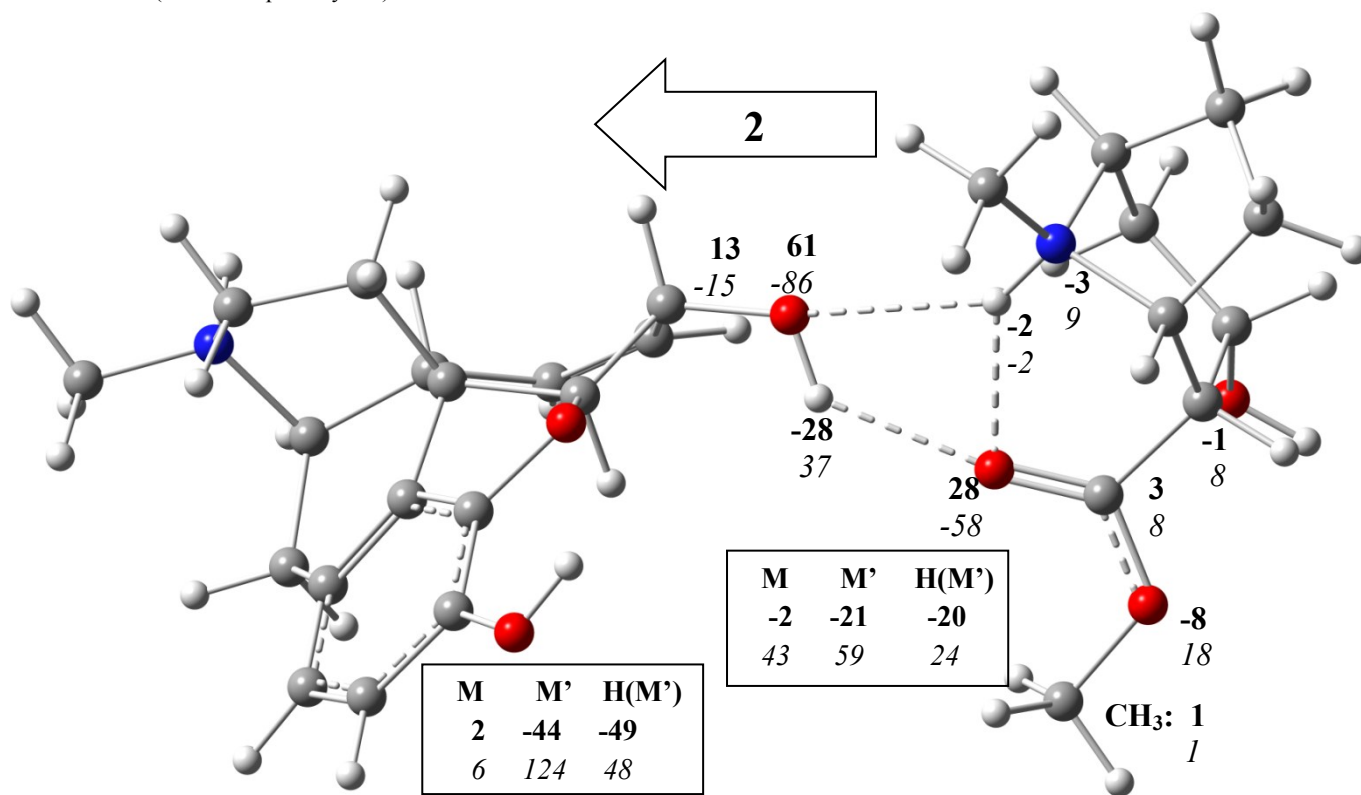

Supplement: c6ra22736h1.pdf [file c6ra22736h1.pdf]
